# Supplementary material for: Synthesis of purine derivatives of Me-TaNA and properties of Me-TaNA-modified oligonucleotides
Source: Royal Society of Chemistry journal article supplement (doi:10.1039/d3ob00745f), 2023-01-01

## Electronic Supplementary Information

### Synthesis of Purine Derivatives of Me-TaNA and Properties of Me-TaNA-modified Oligonucleotides

Yasufumi Fuchi, Kouki Watanabe, Misa Shoji, Yuta Ito and Yoshiyuki Hari \*

*Faculty of Pharmaceutical Sciences, Tokushima Bunri University, Nishihama, Yamashiro-cho, Tokushima 770-8514, Japan*

\*corresponding author: hari@ph.bunri-u.ac.jp

#### List of contents

|                                                                                    |           |
|------------------------------------------------------------------------------------|-----------|
| NOESY spectra (Figure S1–3) and Plausible mechanism (Scheme S1)                    | pp. 2–4   |
| ORTEP structure (Figure S4) and crystallographic data (Table S1)                   | pp. 5–6   |
| NOESY spectrum (Figure S5)                                                         | pp. 7     |
| Experimental procedure (Scheme S2–4)                                               | pp. 8–9   |
| ESI-MS data (Table S2)                                                             | pp. 10    |
| HPLC chromatograms of the crude products ( <b>ON1</b> and <b>ON3</b> ) (Figure S6) | pp. 10    |
| UV melting analyses and CD spectra (Figure S7–9 and Table S3–5)                    | pp. 11–14 |
| <sup>1</sup> H, <sup>13</sup> C and <sup>31</sup> P spectra of new compounds       | pp. 15–66 |
| HPLC analyses and ESI-MS spectra of new oligonucleotides                           | pp. 67–71 |

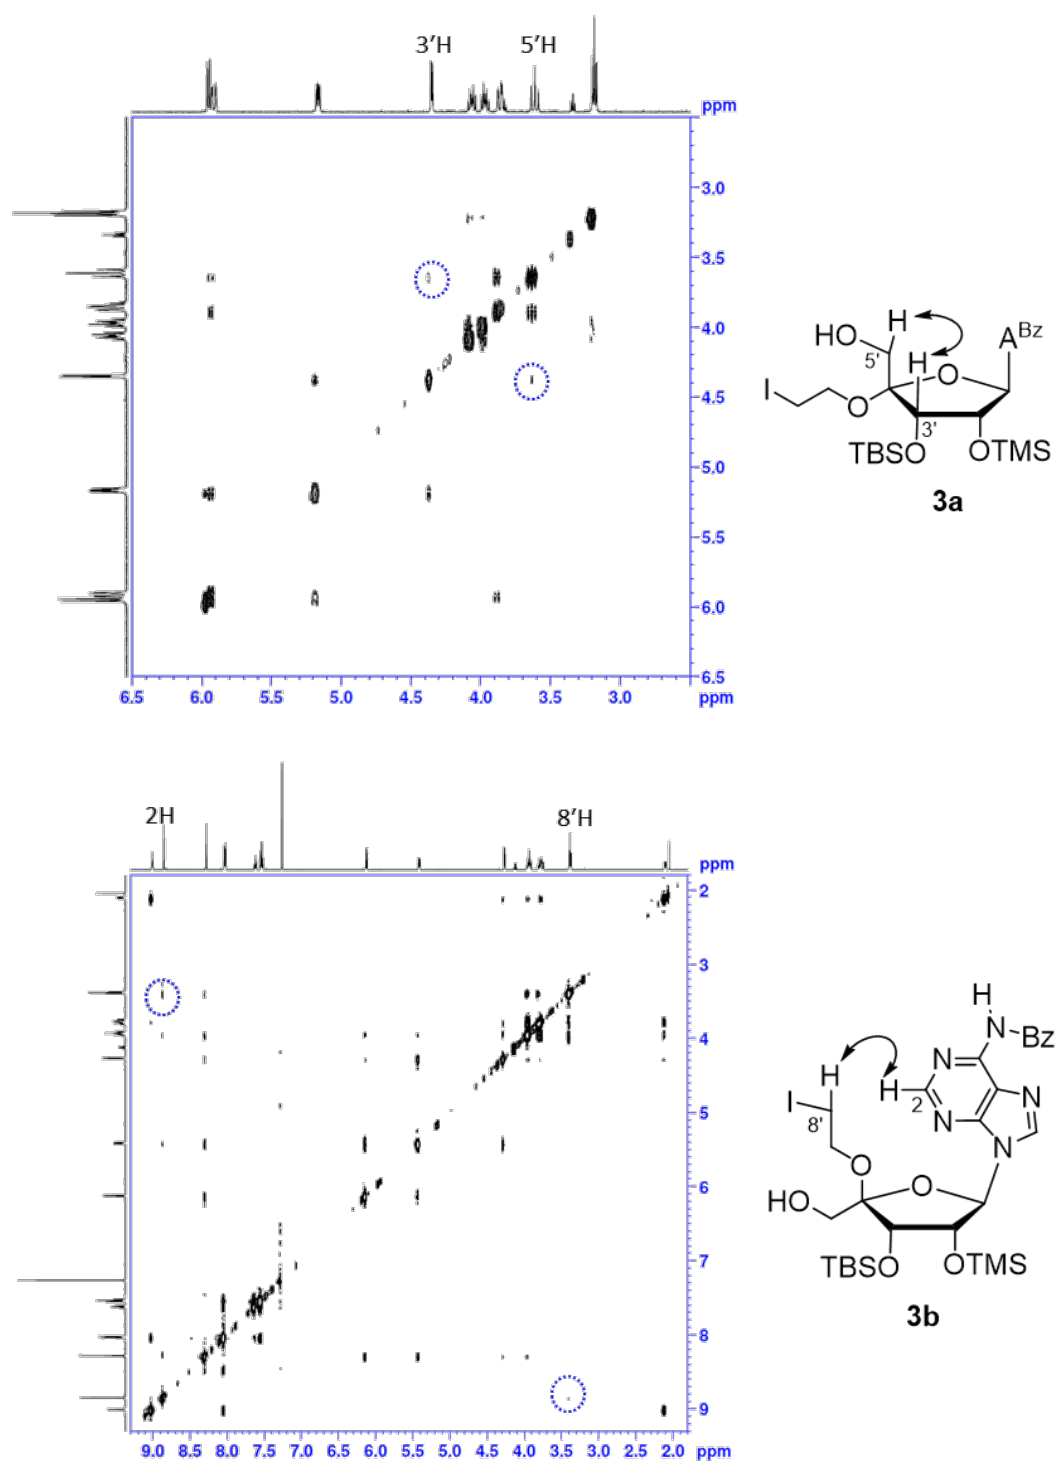

**Figure S1.** NOESY spectrum of compound **3a** (upper) and **3b** (lower). Measurement was performed in CDCl<sub>3</sub>.

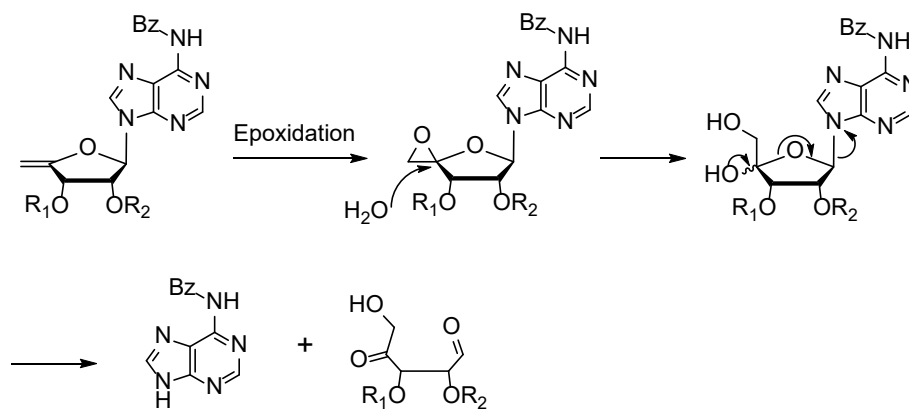

**Scheme S1.** Plausible depurination mechanism of epoxidized adenosine derivative.

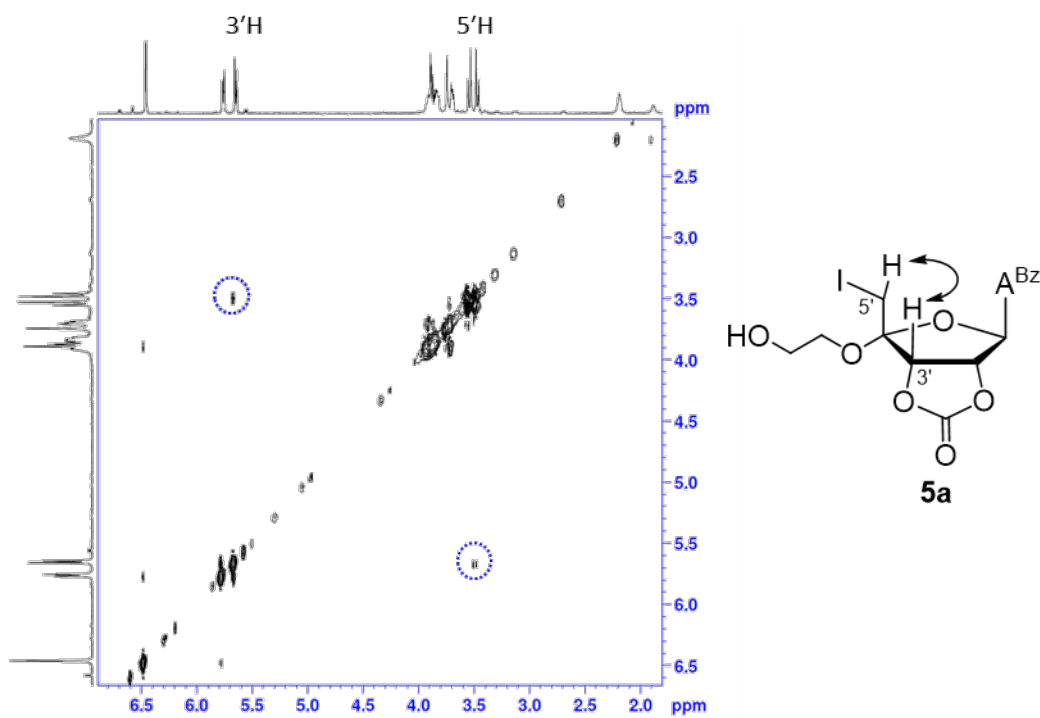

**Figure S2.** NOESY spectrum of compound **5a**. Measurement was performed in CDCl<sub>3</sub>.

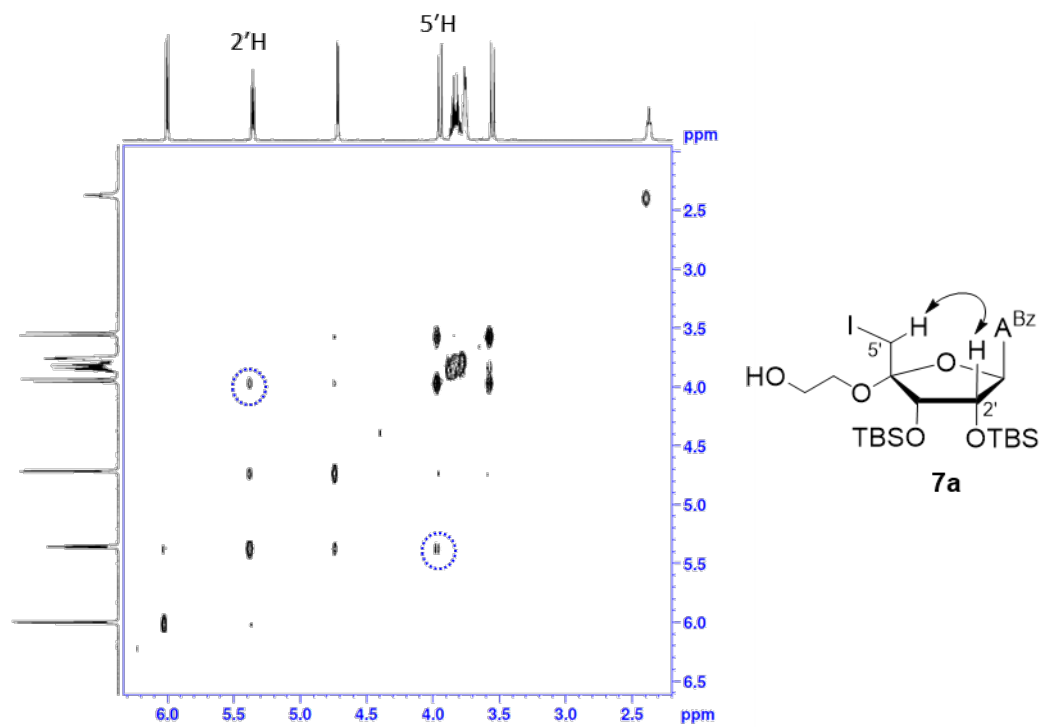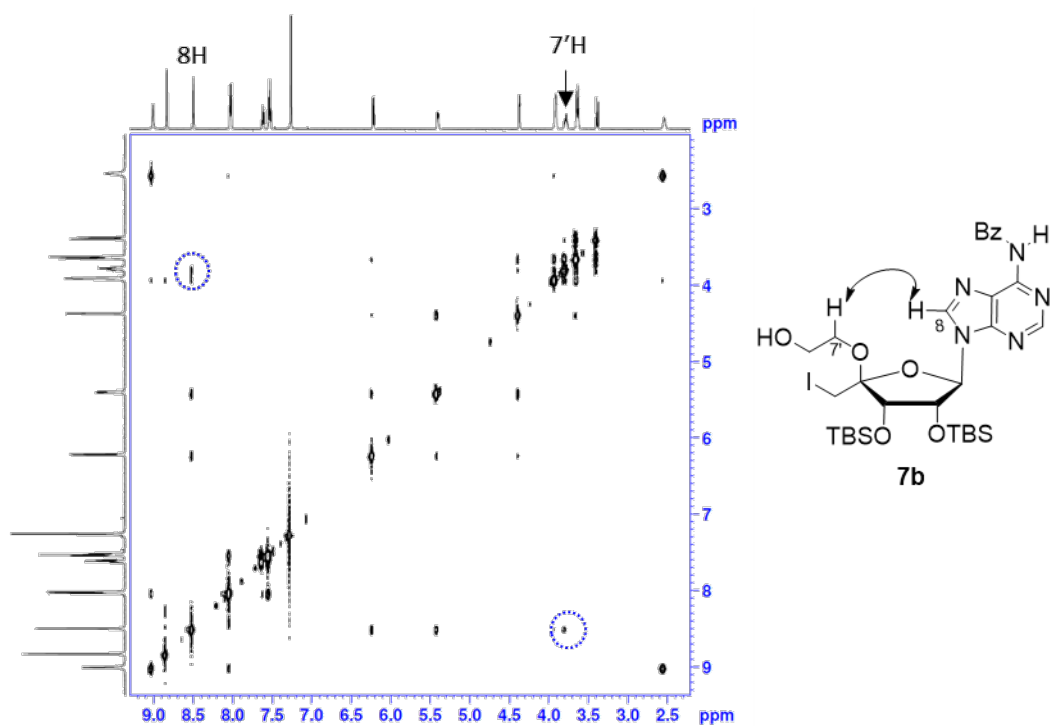

**Figure S3.** NOESY spectrum of compound **7a** (upper) and **7b** (lower). Measurement was performed in  $\text{CDCl}_3$ .

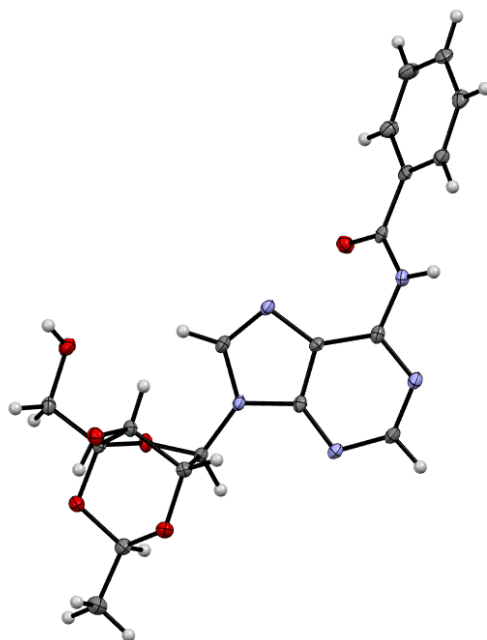

**Figure S4.** ORTEP drawings of compound **12** with 50% ellipsoid probability. The phase angles of pseudorotation was  $13.8^\circ$ .

**Table S1.** Crystallographic and Refinement Parameters of compound **12**.

|                                             | <b>12</b>                                                     |
|---------------------------------------------|---------------------------------------------------------------|
| Empirical formula                           | C <sub>19</sub> H <sub>19</sub> N <sub>5</sub> O <sub>6</sub> |
| Formula weight                              | 413.39                                                        |
| Crystal dimensions                          | 0.2 x 0.4 x 0.4 mm                                            |
| Crystal system                              | Monoclinic                                                    |
| Space group                                 | C2 (#5)                                                       |
| <i>a</i> / Å                                | 23.660(2)                                                     |
| <i>b</i> / Å                                | 6.1601(6)                                                     |
| <i>c</i> / Å                                | 14.0178(13)                                                   |
| $\alpha$ / deg                              | 90                                                            |
| $\beta$ / deg                               | 112.573(2)                                                    |
| $\gamma$ / deg                              | 90                                                            |
| Volume / Å <sup>3</sup>                     | 1886.5(3)                                                     |
| <i>Z</i>                                    | 4                                                             |
| Density (calc.) / g/cm <sup>3</sup>         | 1.455                                                         |
| <i>F</i> <sub>000</sub>                     | 864                                                           |
| Reflections collected                       | 4765                                                          |
| Unique reflections                          | 3282                                                          |
| <i>R</i> <sub>int</sub>                     | 0.0269                                                        |
| Absorption coefficient / cm <sup>-1</sup>   | 1.11                                                          |
| <i>R</i> <sub>I</sub> [I>2.00σ(I)]          | 0.0365                                                        |
| <i>wR</i> <sub>2</sub> (All reflections)    | 0.0974                                                        |
| Goodness-of-fit on F <sup>2</sup>           | 1.029                                                         |
| Largest diff. peak/hole / e Å <sup>-3</sup> | 0.176/-0.256                                                  |
| CCDC No.                                    | 2253791                                                       |

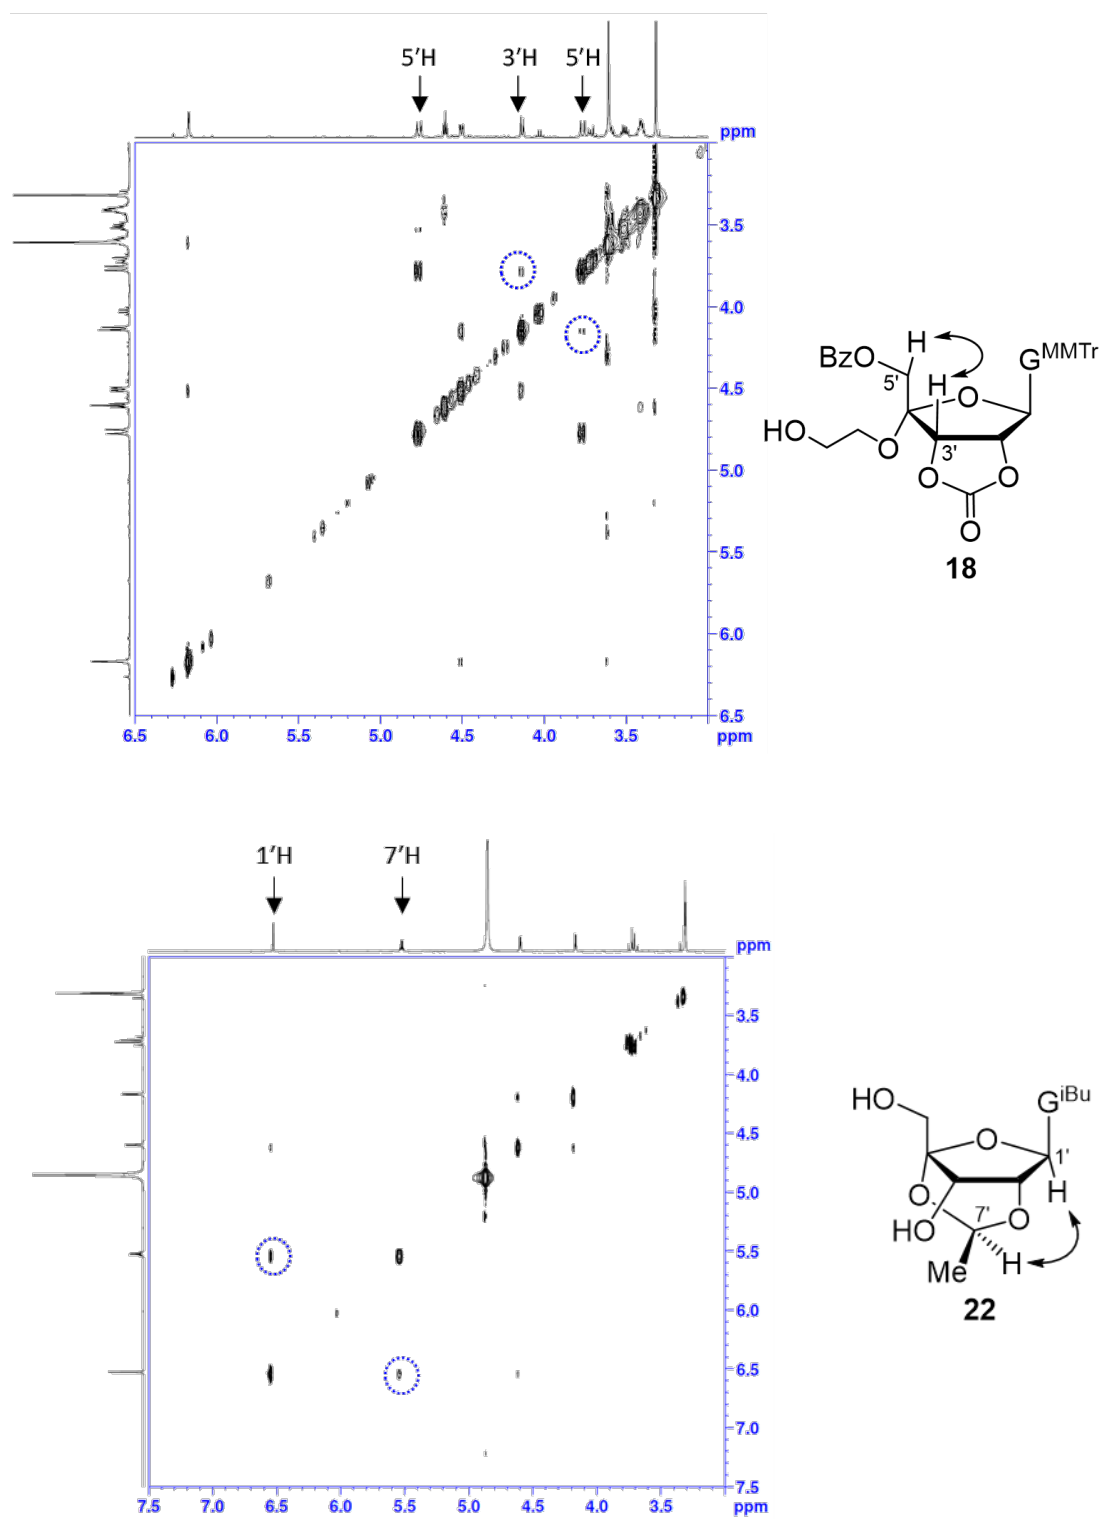

**Figure S5.** NOESY spectrum of compound **18** (upper) and compound **22** (lower). Measurement was performed in DMSO-*d*<sub>6</sub> and CD<sub>3</sub>OD for compound **18** and **22**, respectively.

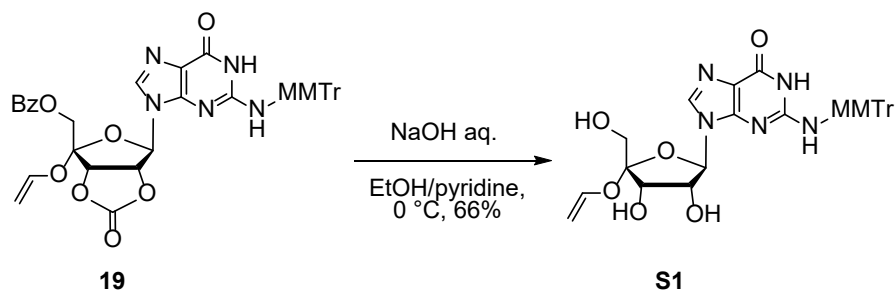

**Scheme S2.** Synthesis of compound **S1**.

*N*<sup>2</sup>-(4-Methoxytrityl)-4'-C-(vinyl-2',3'-O-dihydroxy)-5-deoxy-*b*-D-erythro-pentofuranosylguanine (**S1**). To a solution of compound **9** (240 mg, 0.33 mmol) in EtOH/pyridine (1:1, 3 mL), 2 M NaOH aq. (0.83 mL, 1.66 mmol) was added at 0 °C, and the reaction mixture was stirred at same temperature for 1 h. The reaction mixture was neutralized with DOWEX 50Wx8, and then filtered for removing the resins. The resulting filtrate was concentrated in vacuo. The obtained residue was purified by silica gel column chromatography (CHCl<sub>3</sub> / MeOH = 20:1) to give compound **S1** as a white solid (131 mg, 66%). <sup>1</sup>H NMR (500 MHz, CD<sub>3</sub>OD) δ 7.82 (s, 1H), 7.35–7.27 (m, 9H), 7.26–7.22 (m, 3H), 6.86 (d, 2H, *J* = 9.0 Hz), 6.53 (dd, 1H, *J* = 14.0, 6.0 Hz), 5.46–5.44 (m, 1H), 4.51 (d, 1H, *J* = 14.0 Hz), 4.12–4.09 (m, 3H), 3.78 (s, 3H), 3.48–3.43 (ABq, 2H, *J* = 12.0 Hz). <sup>13</sup>C{<sup>1</sup>H} NMR (125 MHz, CD<sub>3</sub>OD) δ 160.0, 159.3, 152.8, 151.7, 146.0, 146.2, 145.8, 138.4, 138.0, 131.3, 130.0, 130.0, 128.9, 128.9, 128.0, 128.0, 118.2, 114.2, 107.7, 93.0, 90.2, 73.1, 72.0, 72.0, 63.4, 55.7. IR (ATR) cm<sup>-1</sup>: 3324, 1676, 1562, 1508. HRMS (ESI-TOF): calcd for C<sub>32</sub>H<sub>31</sub>N<sub>5</sub>O<sub>7</sub>Na [M+Na]<sup>+</sup> 620.2121, found 620.2124.

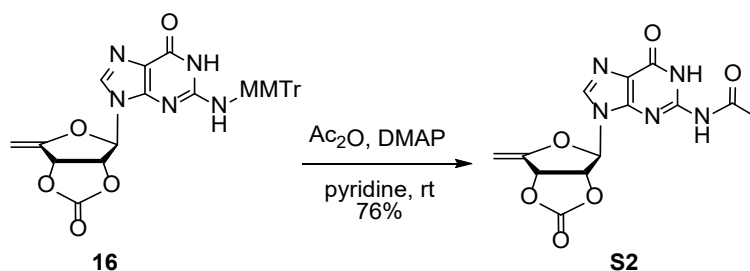

**Scheme S3.** Substitution reaction of MMTTr-protection (compound **16**) to acetyl protection (compound **S2**).

*N*<sup>2</sup>-Acetyl-9-(2,3-O-carbonyl-5-deoxy-*b*-D-erythro-pentofuranosyl)guanine. To a solution of compound **16** (100 mg, 0.18 mmol) in anhydrous pyridine (2 mL), acetic anhydride (36 μL, 0.36 mmol) and DMAP (2.4 mg, 0.02 mmol) were added under an argon atmosphere. The reaction mixture was stirred at room temperature for 23 h and evaporated in vacuo. The obtained residue was purified by column chromatography (silica gel, CHCl<sub>3</sub>/ MeOH = 20:1) to give compound **S2** as a white solid (47 mg, 76%). <sup>1</sup>H NMR (500 MHz, DMSO-*d*<sub>6</sub>) δ 12.06 (s, 1H), 11.35 (s, 1H), 8.12 (s, 1H), 6.77 (s, 1H), 6.52 (d, 1H, *J* = 7.0 Hz), 5.88 (d, 1H, *J* = 7.0 Hz), 4.73 (d, 1H, *J* = 2.5 Hz), 4.59 (d, 1H, *J* = 2.5 Hz),



2.23 (s, 3H).  $^{13}\text{C}\{^1\text{H}\}$  NMR (125 MHz,  $\text{DMSO-}d_6$ )  $\delta$  173.4, 158.4, 154.5, 153.3, 147.9, 147.5, 139.1, 120.6, 90.6, 87.9, 81.3, 78.3, 24.1. IR (ATR)  $\text{cm}^{-1}$ : 3147, 1794, 1669, 1609, 1559. HRMS (ESI-TOF): calcd for  $\text{C}_{13}\text{H}_{10}\text{N}_5\text{O}_6$   $[\text{M-H}]^-$  332.0631, found 332.0631.

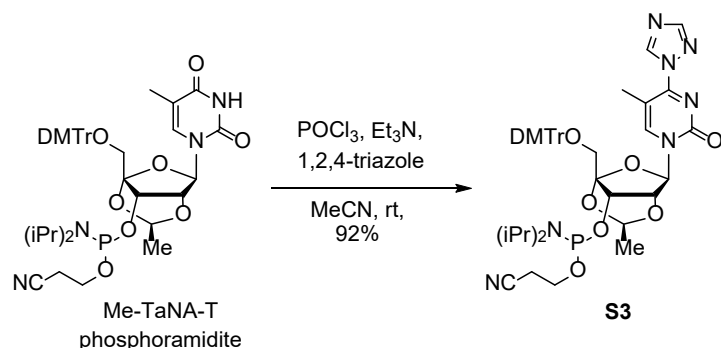

**Scheme S4.** Synthesis of triazolyl compound **S3** from Me-TaNA-T phosphoramidite.

*1-[(1R,3R,5S,7R,8S)-8-[2-Cyanoethoxy(diisopropylamino)phosphinoxy]-5-(4,4'-dimethoxytrityloxy)methyl-3-methyl-2,4,6-trioxabicyclo[3.2.1]octan-7-yl]-4-(1,2,4-triazolyl)thymine (S3)*. Under an argon atmosphere,  $\text{POCl}_3$  (113  $\mu\text{L}$ , 1.25 mmol) and  $\text{Et}_3\text{N}$  (1.0 mL, 7.47 mmol) were added dropwise to a solution of 1,2,4-triazole (430 mg, 6.23 mmol) in MeCN (15 mL) at 0 °C. The reaction mixture was stirred at 0 °C, and then Me-TaNA-T phosphoramidite (200 mg, 0.25 mmol) in MeCN (5 mL) was added to the mixture. The reaction mixture was further stirred at room temperature for 2 h before being quenched by sat.  $\text{NaHCO}_3$  aq., and then diluted with EtOAc. The organic layer was washed with water and brine, dried over  $\text{Na}_2\text{SO}_4$ , filtered, and concentrated in vacuo. The residue was purified by silica gel column chromatography (hexane/EtOAc = 1/2 to 1/3) to obtain compound **S3** (195 mg, 92%) as a white solid.  $^1\text{H}$  NMR (500 MHz,  $\text{CDCl}_3$ )  $\delta$ : 9.26 (s, 0.5H), 9.25 (s, 0.5H), 8.40 (s, 1H), 8.07 (s, 0.5H), 8.06 (s, 0.5H), 7.46–7.40 (m, 2H), 7.35–7.27 (m, 7H), 6.89–6.82 (m, 4H), 6.33 (s $\times$ 2, 1H), 5.47–5.42 (m, 1H), 4.79–4.77 (m, 1H), 4.37–4.32 (m, 1H), 3.87–3.79 (m, 7H), 3.67–3.50 (m, 5H), 3.44–3.41 (m, 1H), 2.64–2.48 (m, 1H), 2.45–2.34 (m, 1H), 1.70 (s, 1.5H), 1.66 (s, 1.5H), 1.38–1.36 (m, 3H), 1.19–1.08 (m, 12H)  $^{31}\text{P}\{^1\text{H}\}$  NMR (162 MHz,  $\text{CDCl}_3$ )  $\delta$ : 150.2, 149.3. IR (ATR)  $\nu$ : 2966, 2933, 2877, 2837, 1675, 1630, 1607, 1502  $\text{cm}^{-1}$ . HRMS (ESI)  $m/z$ :  $[\text{M}+\text{Na}]^+$  Calcd for  $\text{C}_{44}\text{H}_{52}\text{N}_7\text{O}_9\text{NaP}$  876.3462, Found 876.3469.

**Table S2.** ESI-MS analysis data and the overall yields of new ONs produced in this study.

| ONs        | Formula                                                                           | Calcd. [M] | Found [M] | Overall yield (%) |
|------------|-----------------------------------------------------------------------------------|------------|-----------|-------------------|
| <b>ON1</b> | C <sub>118</sub> H <sub>148</sub> N <sub>49</sub> O <sub>68</sub> P <sub>11</sub> | 3681.47    | 3682.00   | 16%               |
| <b>ON2</b> | C <sub>118</sub> H <sub>148</sub> N <sub>49</sub> O <sub>68</sub> P <sub>11</sub> | 3681.47    | 3681.90   | 17%               |
| <b>ON3</b> | C <sub>120</sub> H <sub>150</sub> N <sub>49</sub> O <sub>70</sub> P <sub>11</sub> | 3739.50    | 3740.00   | 15%               |
| <b>ON4</b> | C <sub>120</sub> H <sub>150</sub> N <sub>49</sub> O <sub>70</sub> P <sub>11</sub> | 3739.50    | 3740.00   | 14%               |
| <b>ON5</b> | C <sub>144</sub> H <sub>178</sub> N <sub>49</sub> O <sub>90</sub> P <sub>11</sub> | 4375.97    | 4376.00   | 5%                |

Crude (**ON1**)

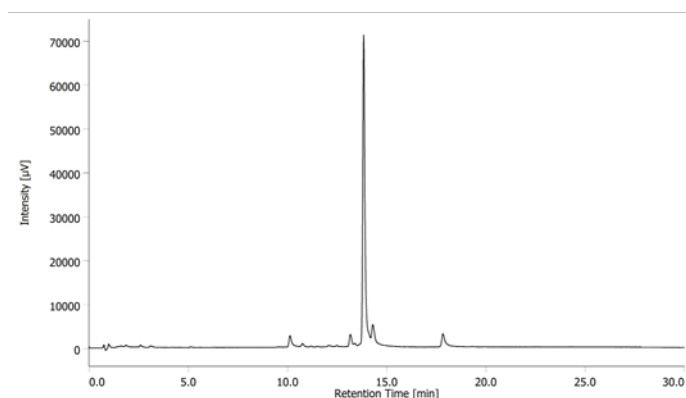

Crude (**ON3**)

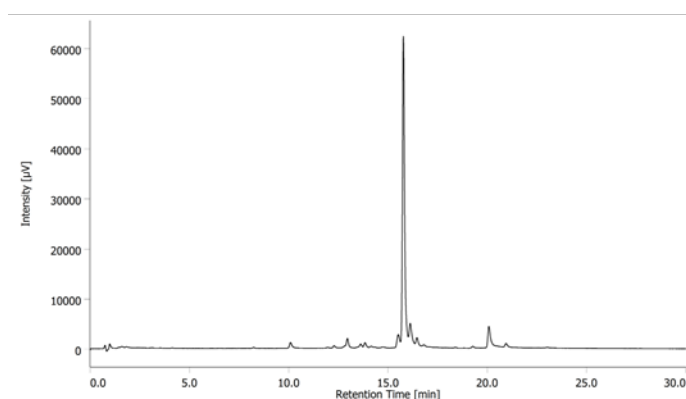

**Figure S6.** HPLC chromatograms of the crude products (**ON1** and **ON3**) before HPLC purification. HPLC conditions: Waters XBridge<sup>®</sup> MS C<sub>18</sub> 5.0  $\mu\text{m}$ , 4.6  $\times$  50 mm; gradient, 5-15% MeCN in triethylammonium acetate (0.1 M, pH 7.0) buffer for 30 min; flow rate, 1.0 mL/min; column temp., 40  $^{\circ}\text{C}$ .

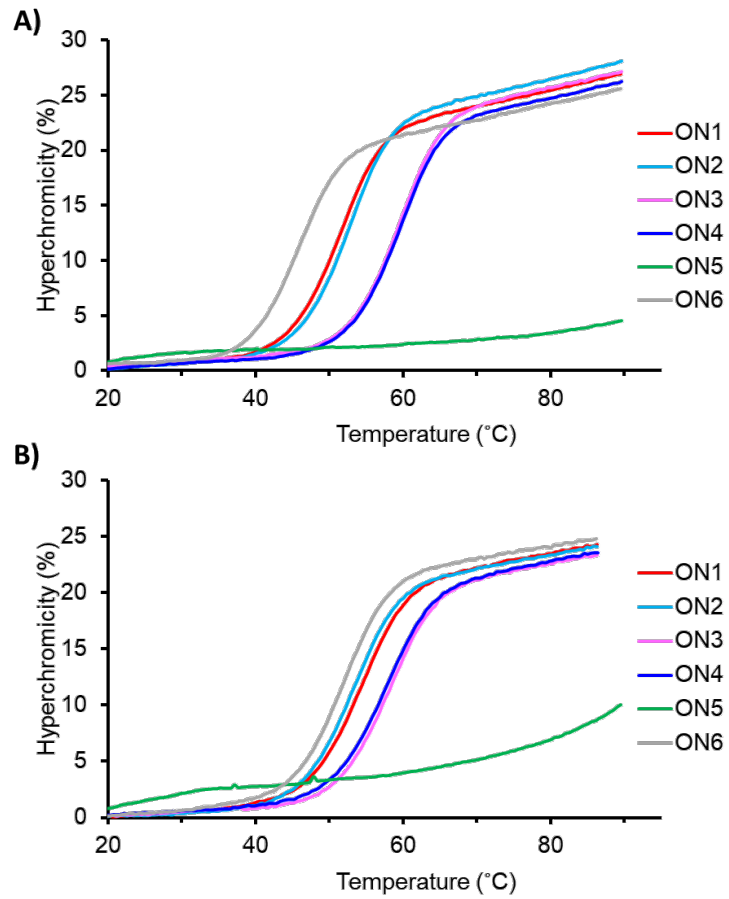

**Figure S7.** UV melting curves of DNA-RNA duplex and DNA-DNA duplex. A) For target ssRNA and B) for target ssDNA

**Table S3.** Duplex stability of ONs modified by 2',4'-BNA/LNA with ssRNA and ssDNA <sup>a</sup>

| ON (5' to 3')               | ssRNA                            | ssDNA                            |
|-----------------------------|----------------------------------|----------------------------------|
|                             | $T_m$ ( $\Delta T_m$ /mod.) (°C) | $T_m$ ( $\Delta T_m$ /mod.) (°C) |
| ACGAGA <u>A</u> CATCC       | 50 (+5.0)                        | 54 (+3.0)                        |
| ACGAGA <u>A</u> ACATCC      | 52 (+7.0)                        | 54 (+3.0)                        |
| ACGAGA <u>A</u> ACATCC      | 58 (+6.5)                        | 57 (+3.0)                        |
| ACGAGA <u>A</u> ACATCC      | 58 (+6.5)                        | 57 (+3.0)                        |
| ACGAGAACATCC ( <b>ON6</b> ) | 45                               | 51                               |

<sup>a</sup> Conditions: 10 mM sodium phosphate buffer (pH 7.0) containing 200 mM NaCl and 2.5  $\mu$ M of each ON. Underlined letters in the sequences denotes the 2',4'-BNA/LNA derivatives. The ssRNA and ssDNA sequences were 5'-r(GGAUGUUCUCGU)-3' and 5'-d(GGATGTTCTCGT)-3', respectively.  $\Delta T_m$ /mod.: Change in  $T_m$  value per modification relative to natural DNA (ON6).

**Table S4.**  $T_m$  and  $\Delta T_m$  values (°C) of full- and mis-match duplexes with ssRNA and ssDNA<sup>a</sup>

| 5'-ACGAGAXCATCC-3'           | ssRNA: 5'-r(GGAUGYUCUCGU)-3' |          |         |          |
|------------------------------|------------------------------|----------|---------|----------|
|                              | Y = U                        | Y = A    | Y = G   | Y = C    |
| X = Me-TaNA-A ( <b>ON1</b> ) | 51                           | 39 (-12) | 42 (-9) | 41 (-10) |
| X = A ( <b>ON6</b> )         | 45                           | 36 (-9)  | 38 (-7) | 36 (-9)  |
| 5'-ACGAGAXCATCC-3'           | ssDNA: 5'-d(GGATGYTCTCGT)-3' |          |         |          |
|                              | Y = T                        | Y = A    | Y = G   | Y = C    |
| X = Me-TaNA-A ( <b>ON1</b> ) | 54                           | 41 (-13) | 45 (-9) | 42 (-12) |
| X = A ( <b>ON6</b> )         | 51                           | 39 (-12) | 45 (-6) | 40 (-11) |

<sup>a</sup> Conditions: 10 mM sodium phosphate buffer (pH 7.0) containing 200 mM NaCl and 2.5  $\mu$ M of each ON. The  $\Delta T_m$  values, which are the changes in  $T_m$  values relative to those of the full-match duplex (Y = U or T), are shown in parentheses.

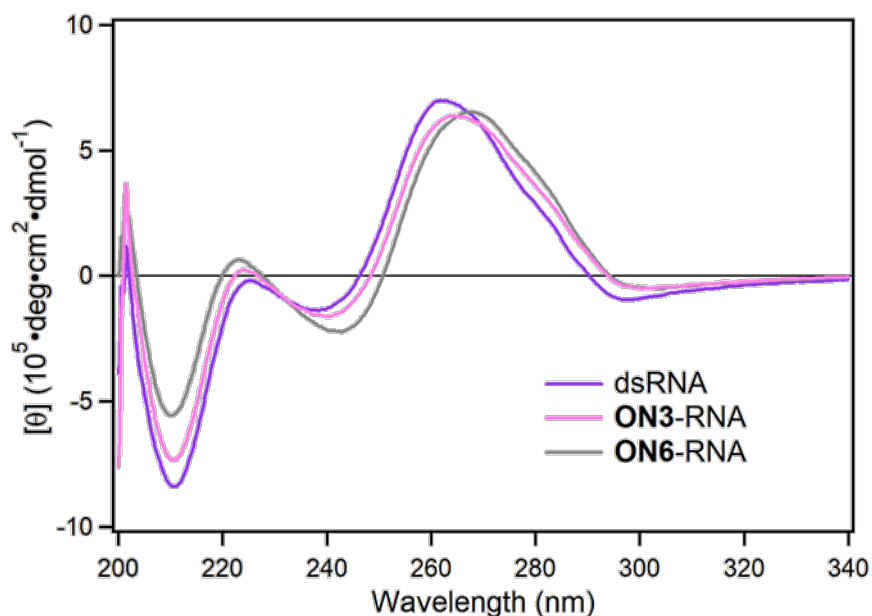

**Figure S8.** CD spectra of duplexes with RNA complements by DNA (**ON6**) and **ON3**. The sequence of RNA complement was 5'-r(GGAUGUUCUCGU)-3'. dsRNA denotes RNA duplex (5'-r(ACGAGAACAUC)-3'/3'-r(UGCUCUUGUAGG)-5'). Conditions: 10 mM sodium phosphate buffer (pH 7.0) containing 200 mM NaCl and 2.5  $\mu$ M of each ON.

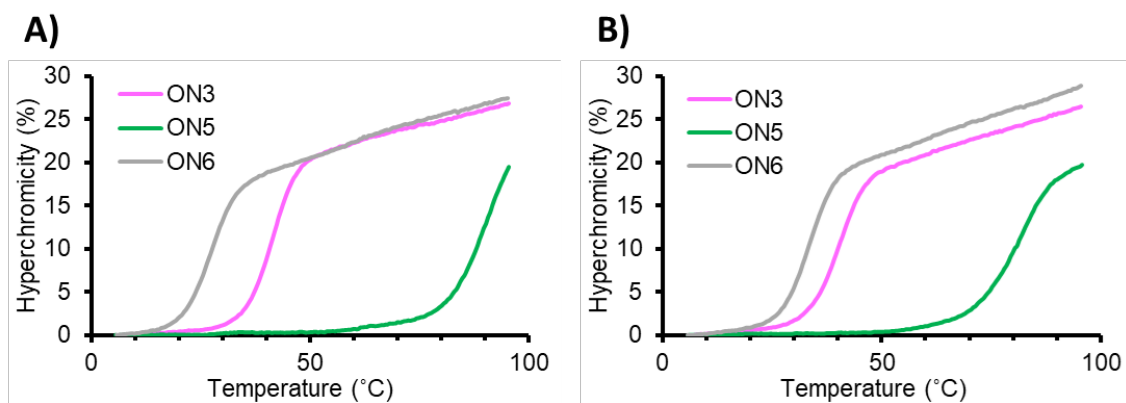

**Figure S9.** UV melting curves of DNA-RNA duplex (**A**) and DNA-DNA duplex (**B**). Conditions: 10 mM sodium phosphate buffer (pH 7.0) containing 2.5  $\mu$ M of each ON. The ssRNA and ssDNA sequences are 5'-r(GGAUGUUCUCGU)-3' and 5'-d(GGATGTTCTCGT)-3', respectively.  $T_m$  values; **ON3**: 41 and 40  $^{\circ}$ C, **ON5**: > 90 and 82  $^{\circ}$ C, **ON6**: 27 and 33  $^{\circ}$ C for RNA and DNA, respectively.

**Table S5.** Duplex stability of modified ONs.<sup>a</sup>

| Duplexes                                                              | $T_m$<br>$\Delta T_m/\text{mod. (}^\circ\text{C)}$ |
|-----------------------------------------------------------------------|----------------------------------------------------|
| 5'-d(ACGAG <b>A</b> ACATCC)-3'<br>3'-d(TGCTCTTGTAGG)-5'               | 56<br>(+2.5)                                       |
| 5'-d(ACGAG <b>A</b> ACATCC)-3'<br>3'-d(TGCT <sup>m</sup> CTTGTAGG)-5' | 55<br>(+2.0)                                       |
| 5'-d(ACGAG <b>A</b> ACATCC)-3'<br>3'-d(TGCT <sup>m</sup> CTTGTAGG)-5' | 67<br>(+4.0)                                       |
| 5'-d(ACGAG <b>A</b> ACATCC)-3'<br>3'-d(TGCT <sup>m</sup> CTTGTAGG)-5' | 68<br>(+4.3)                                       |
| 5'-d(ACGAG <b>A</b> ACATCC)-3'<br>3'-d(TGCTCTTGTAGG)-5'               | 51                                                 |

<sup>a</sup>Conditions: 10 mM sodium phosphate buffer (pH 7.0) containing 200 mM NaCl and 2.5  $\mu\text{M}$  of each ON. Bold letters in the sequences denotes Me-TaNA derivatives.

Compound **3a** (500 MHz  $^1\text{H}$  NMR in  $\text{CDCl}_3$ )

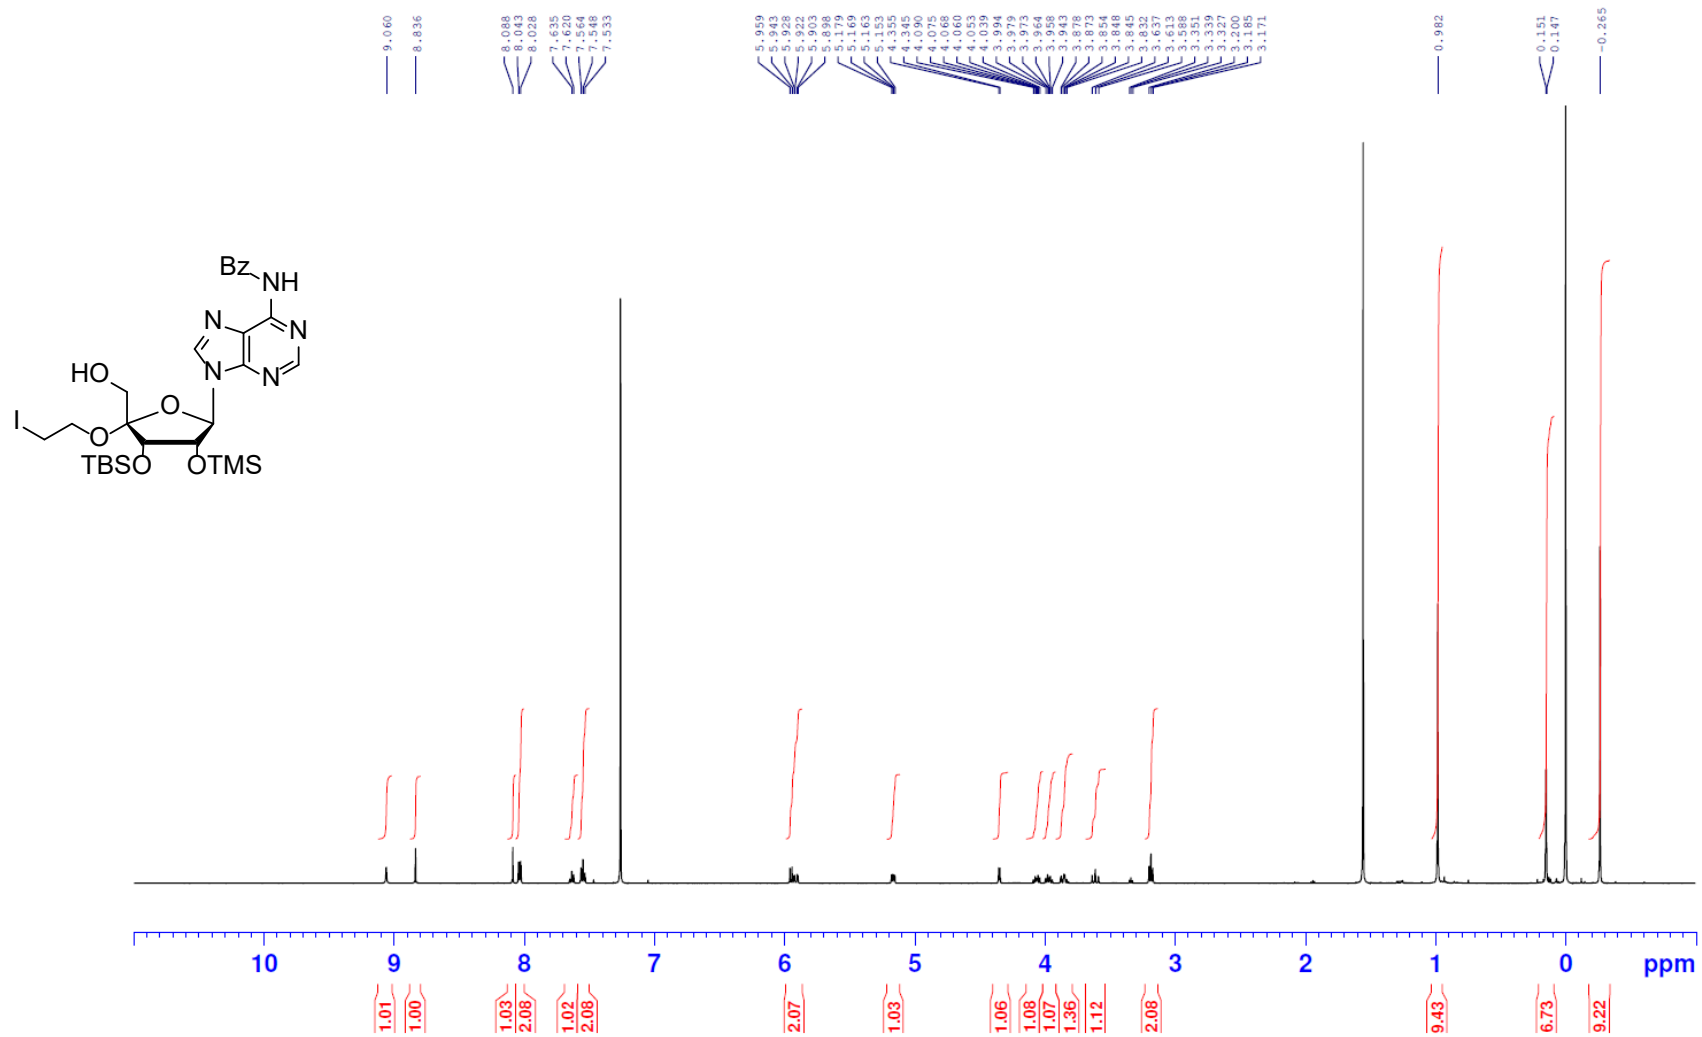

Compound **3a** (125 MHz  $^{13}\text{C}$  NMR in  $\text{CDCl}_3$ )

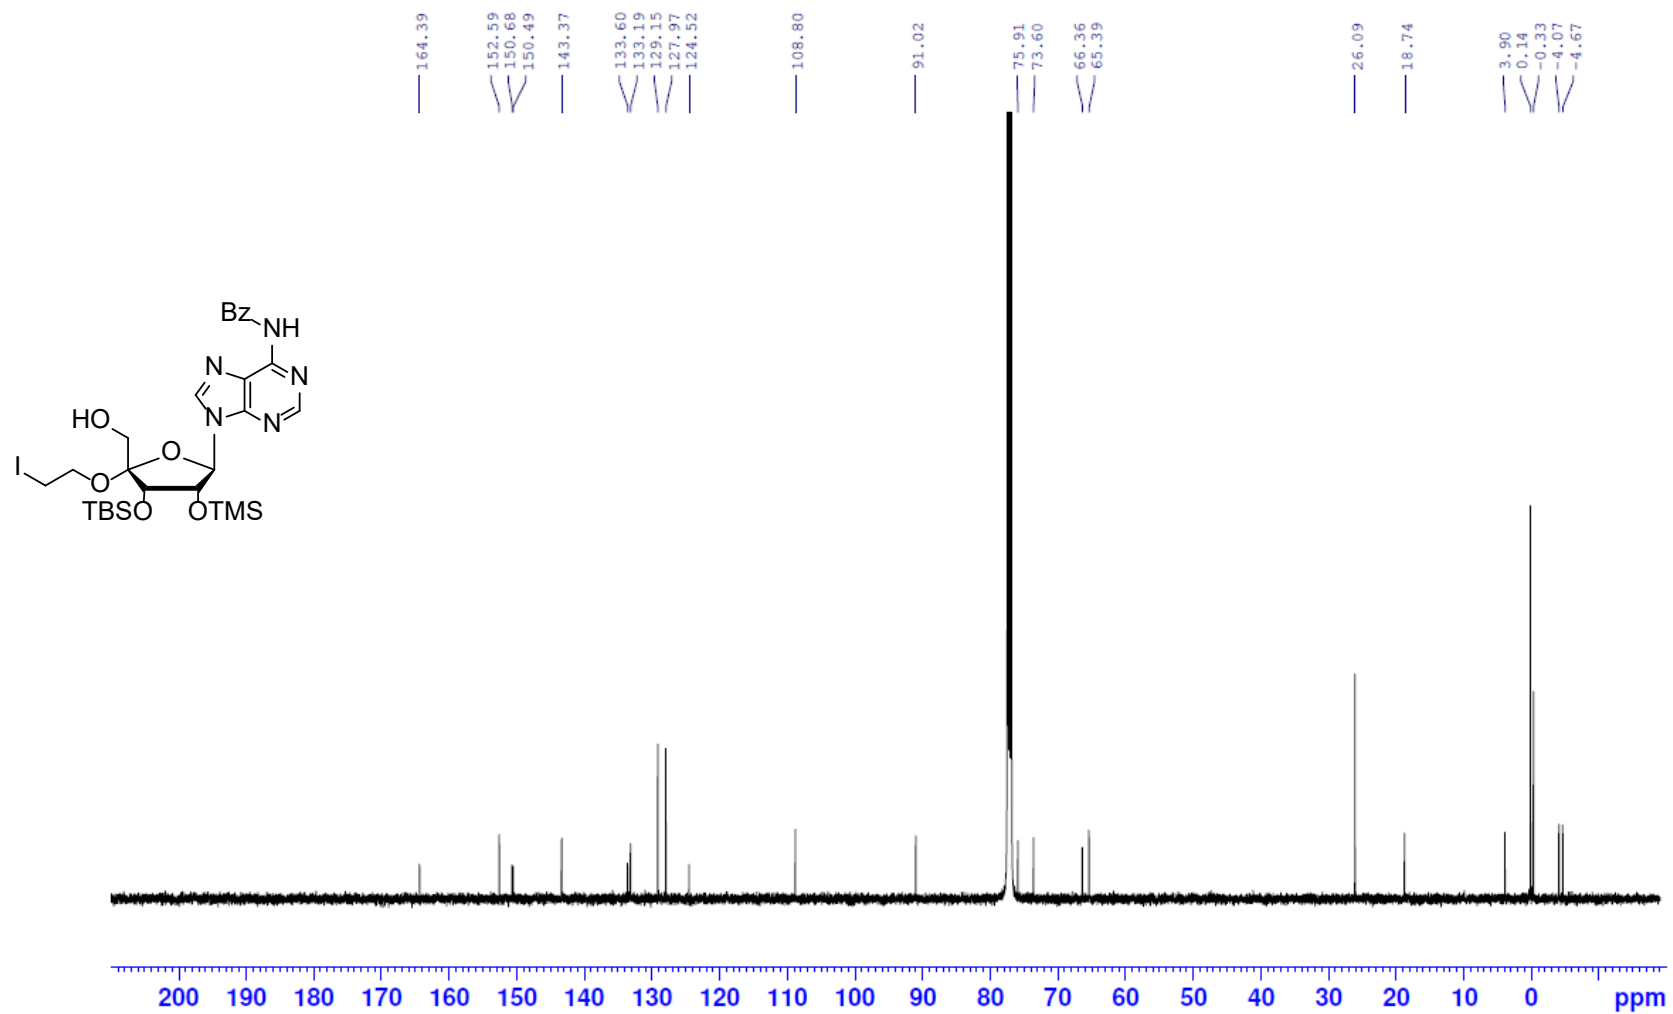



Compound **3b** (500 MHz  $^1\text{H}$  NMR in  $\text{CDCl}_3$ )

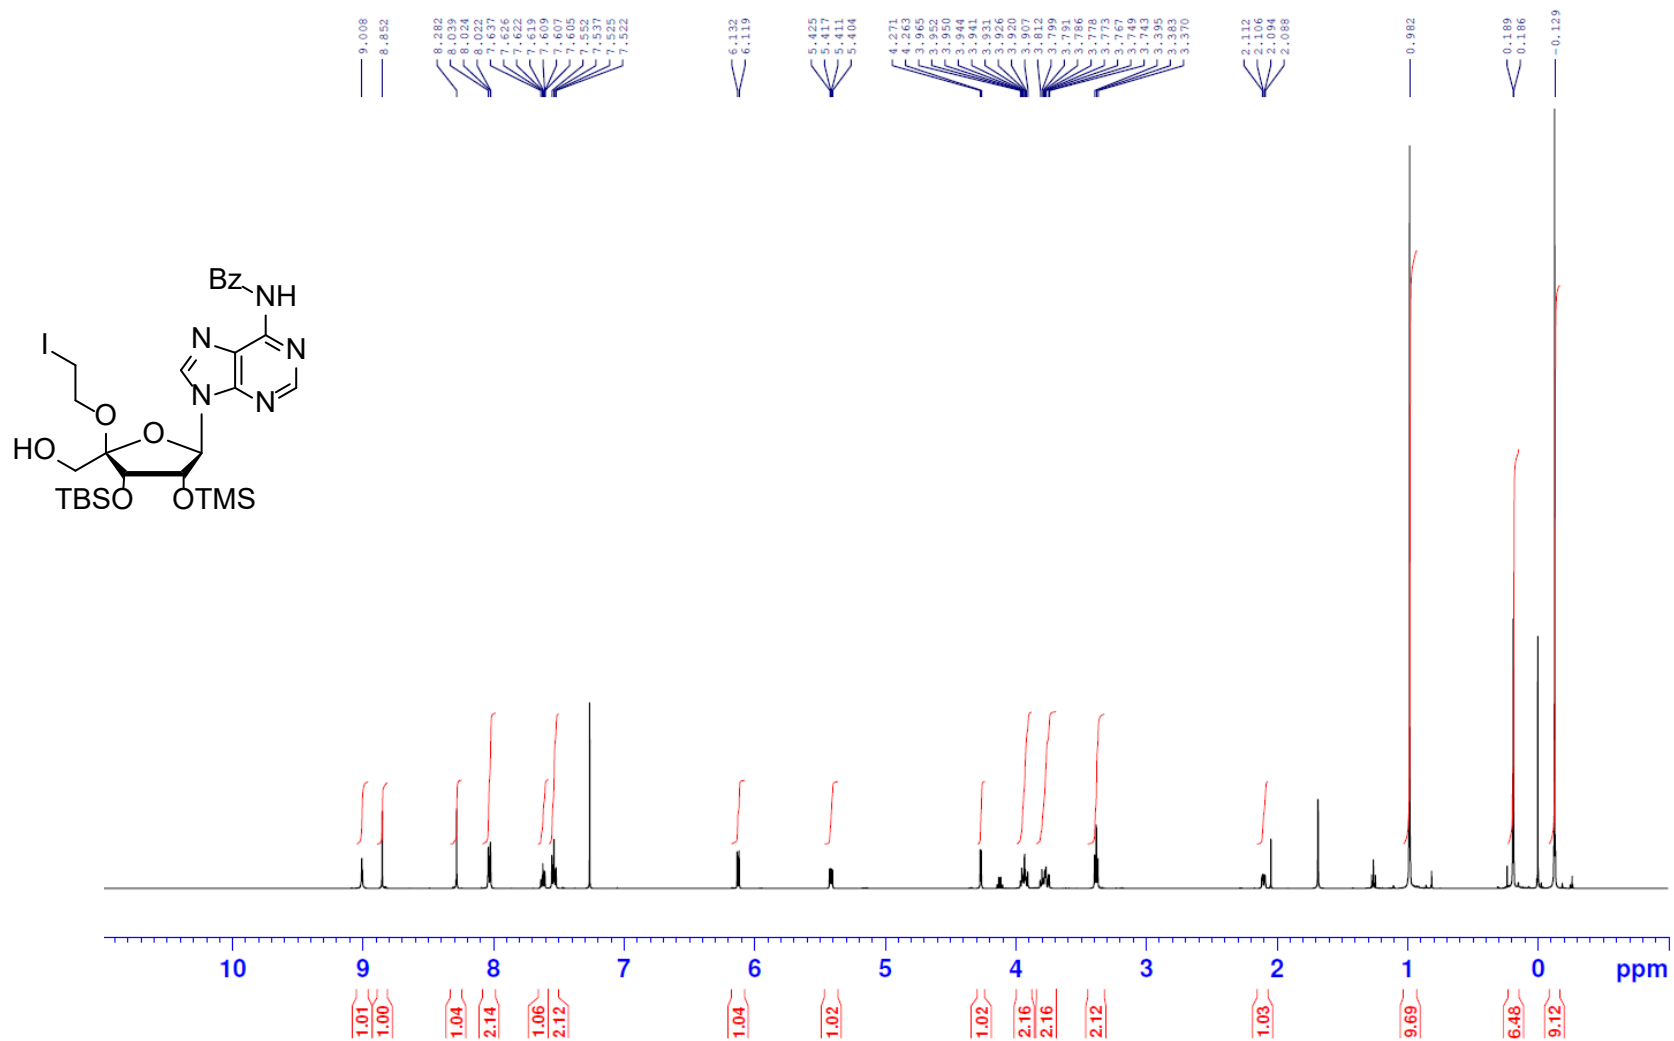

Compound **3b** (125 MHz  $^{13}\text{C}$  NMR in  $\text{CDCl}_3$ )

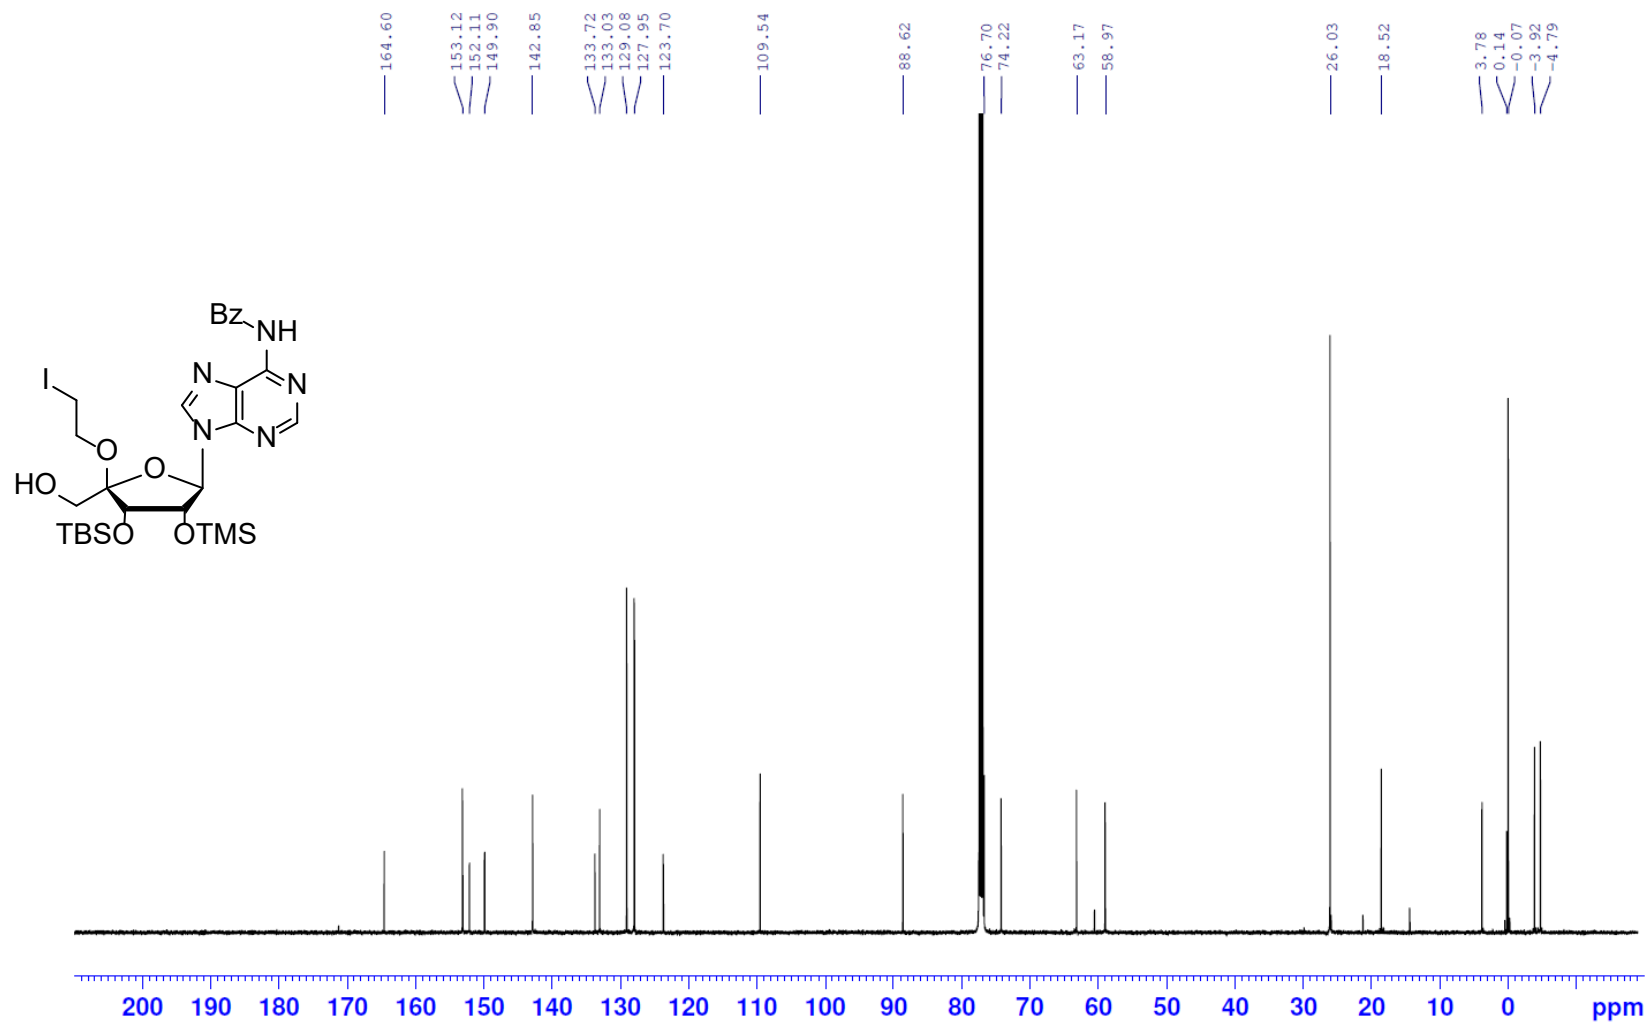

Compound **5a** (500 MHz  $^1\text{H}$  NMR in  $\text{CDCl}_3$ )

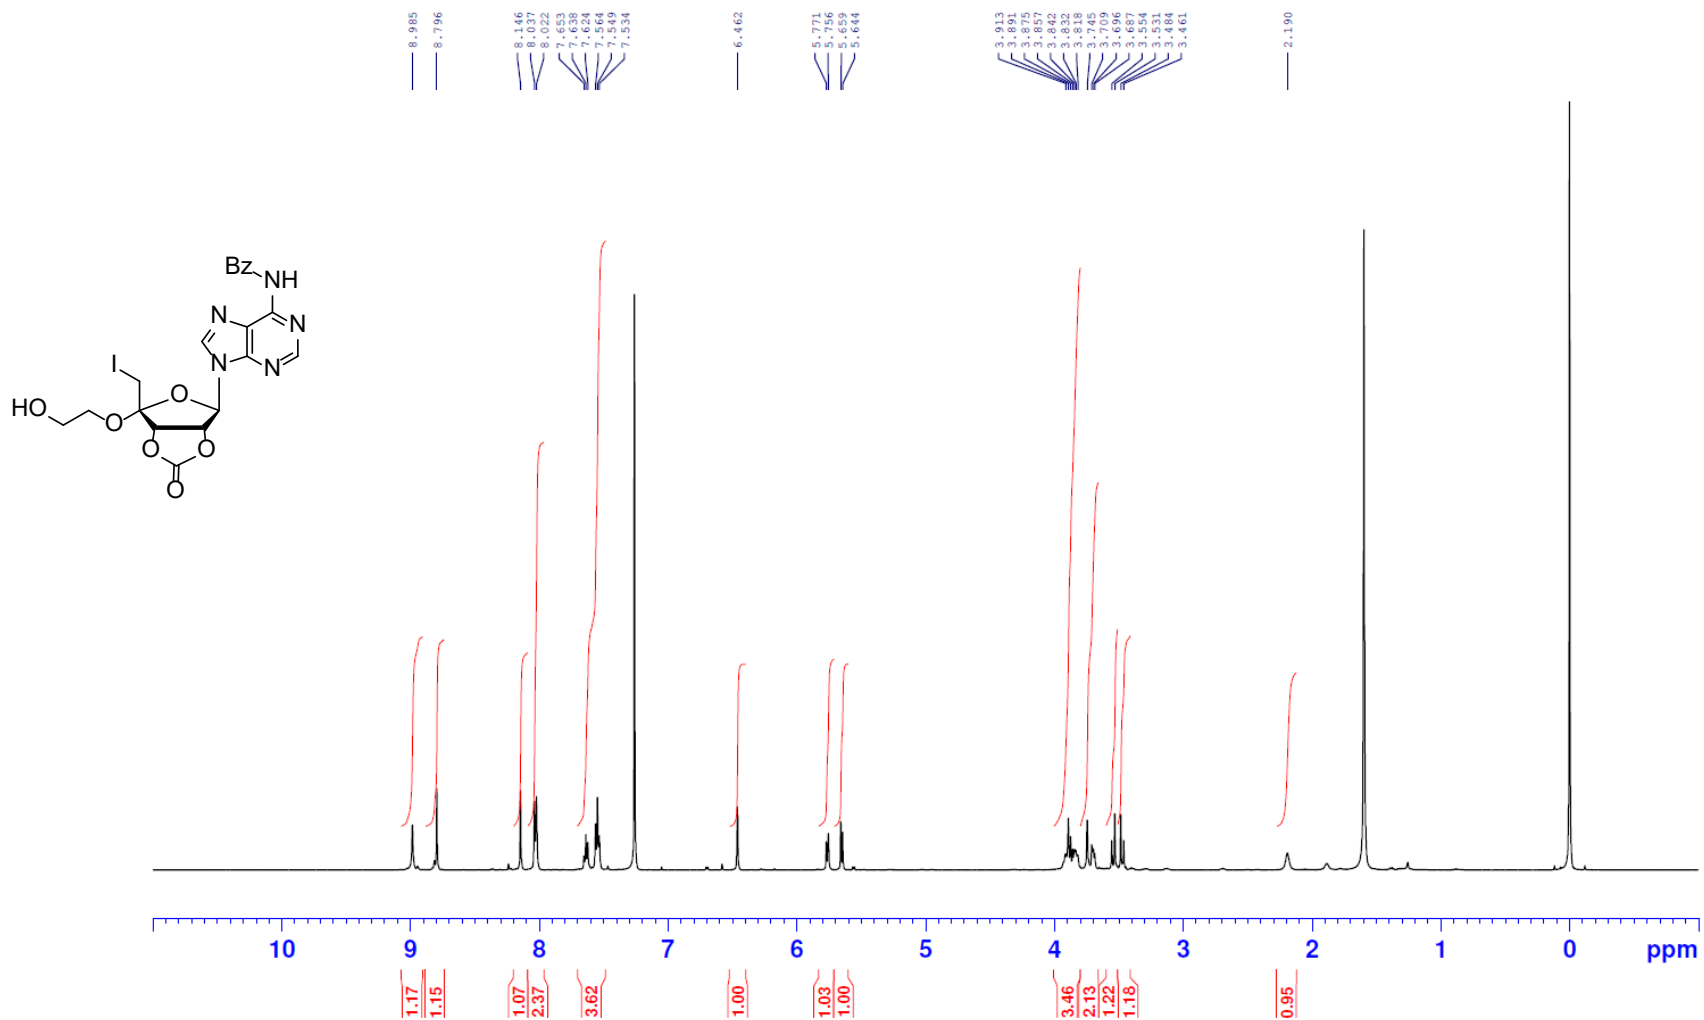

Compound **5a** (125 MHz  $^{13}\text{C}$  NMR in  $\text{CDCl}_3$ )

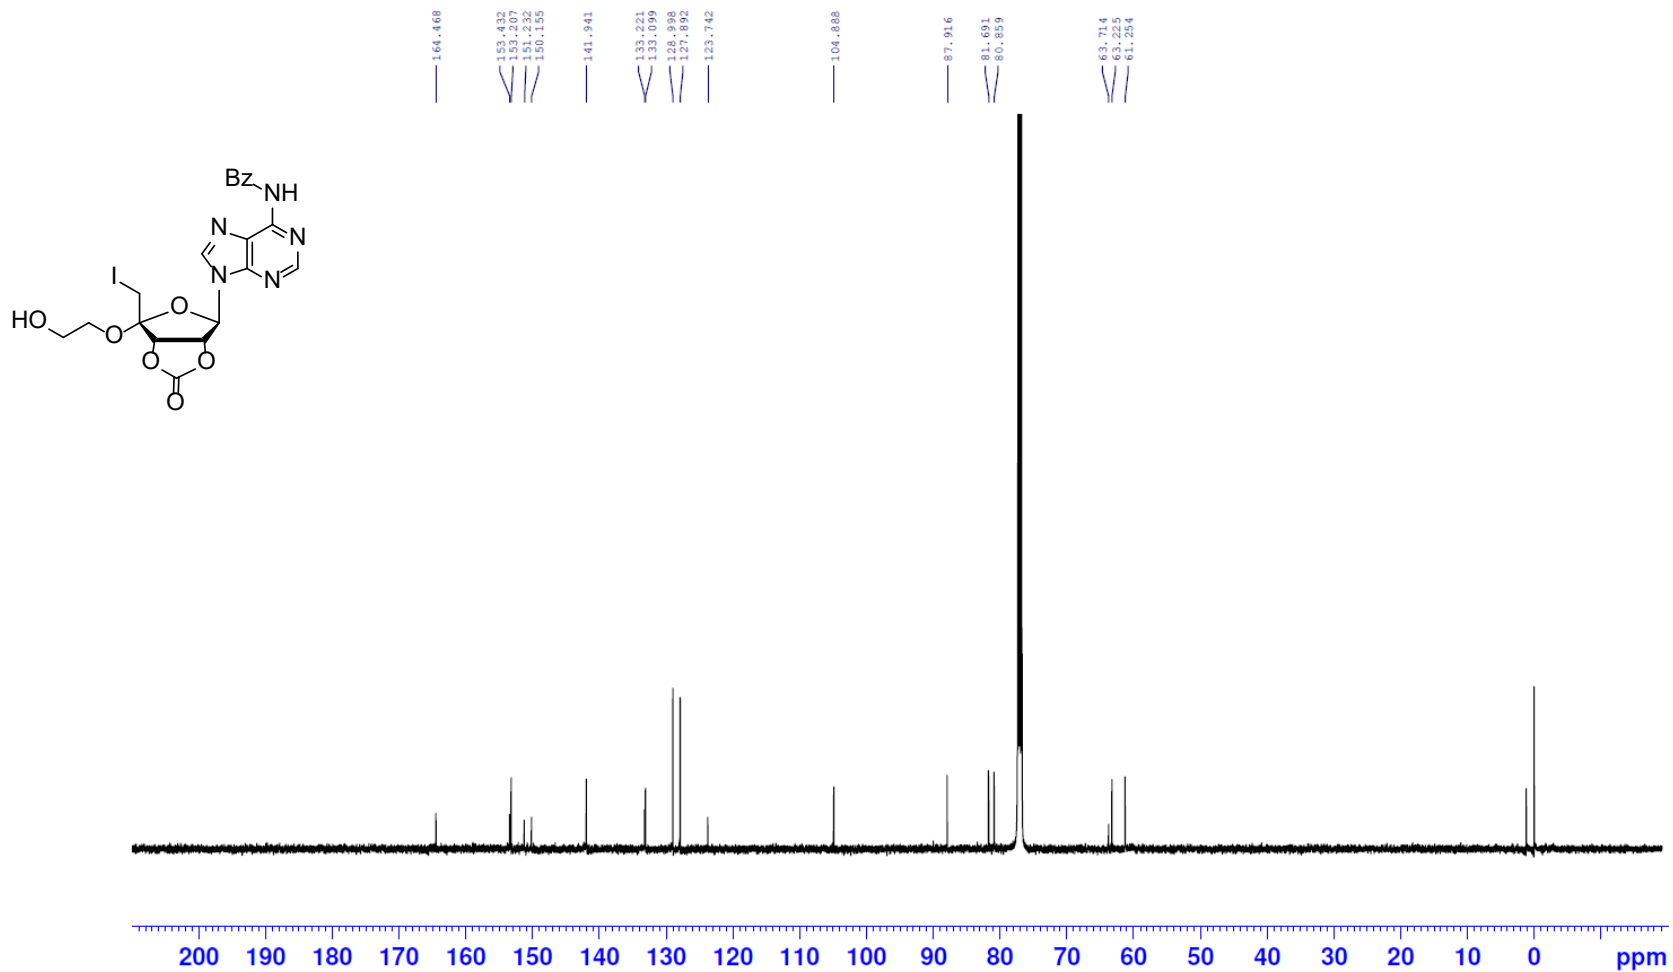

Compound 6 (500 MHz  $^1\text{H}$  NMR in  $\text{CDCl}_3$ )

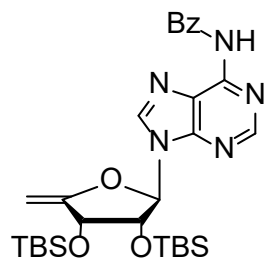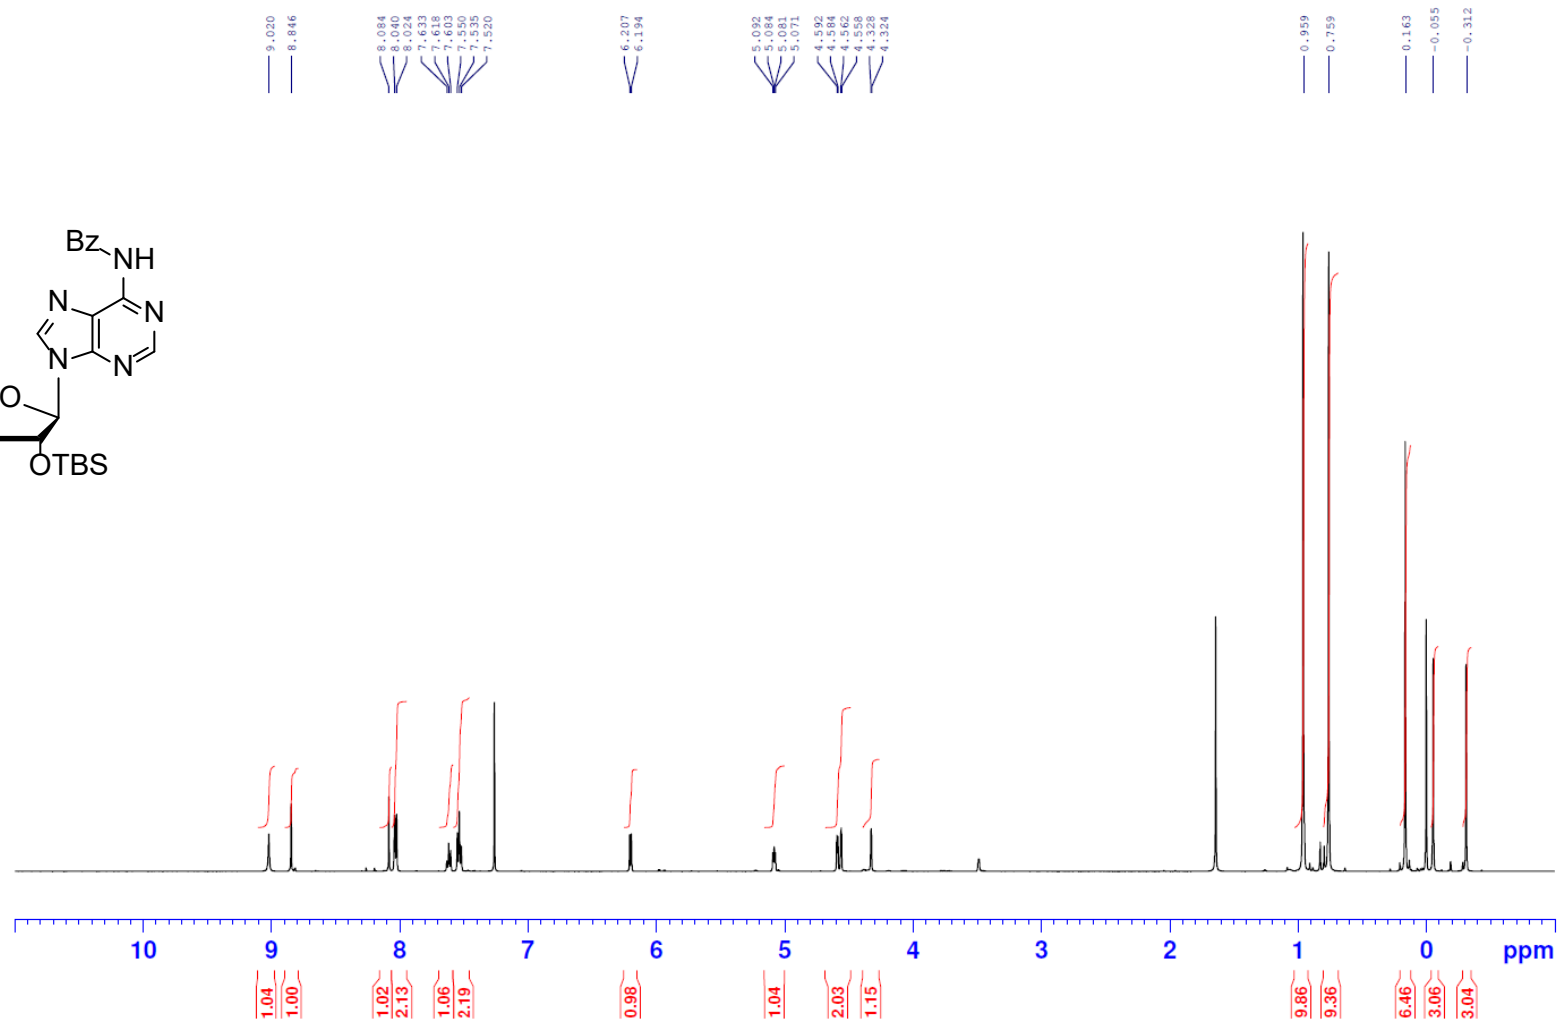

Compound 6 (125 MHz  $^{13}\text{C}$  NMR in  $\text{CDCl}_3$ )

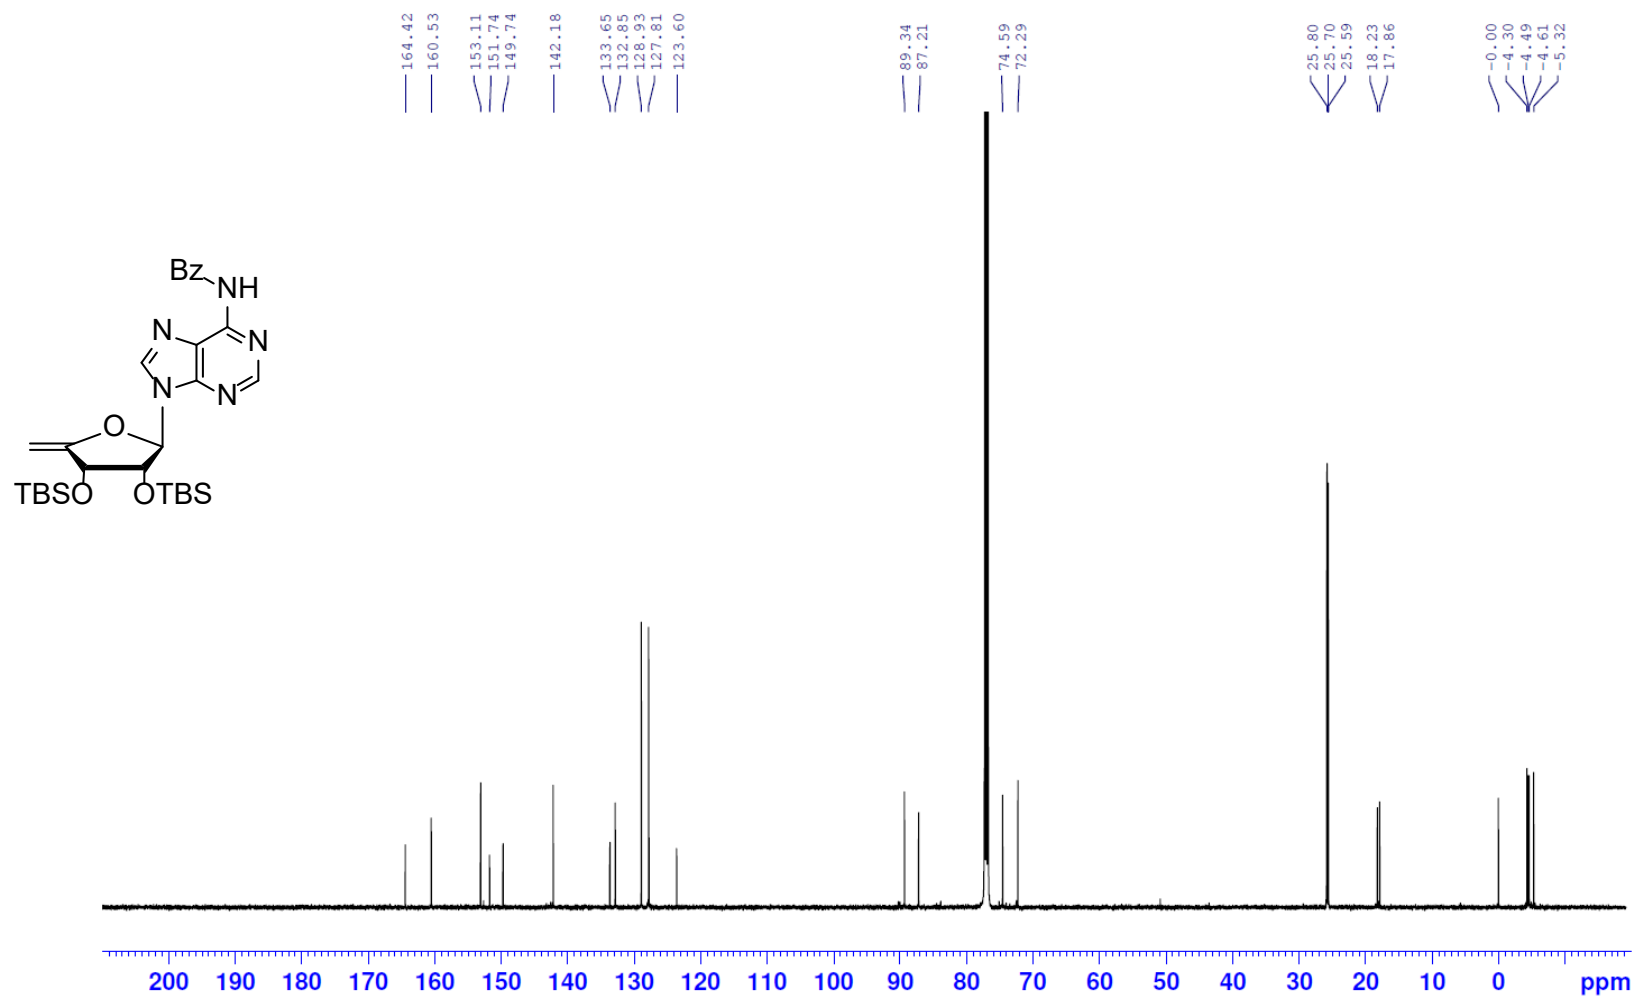

Compound **7a** (500 MHz  $^1\text{H}$  NMR in  $\text{CDCl}_3$ )

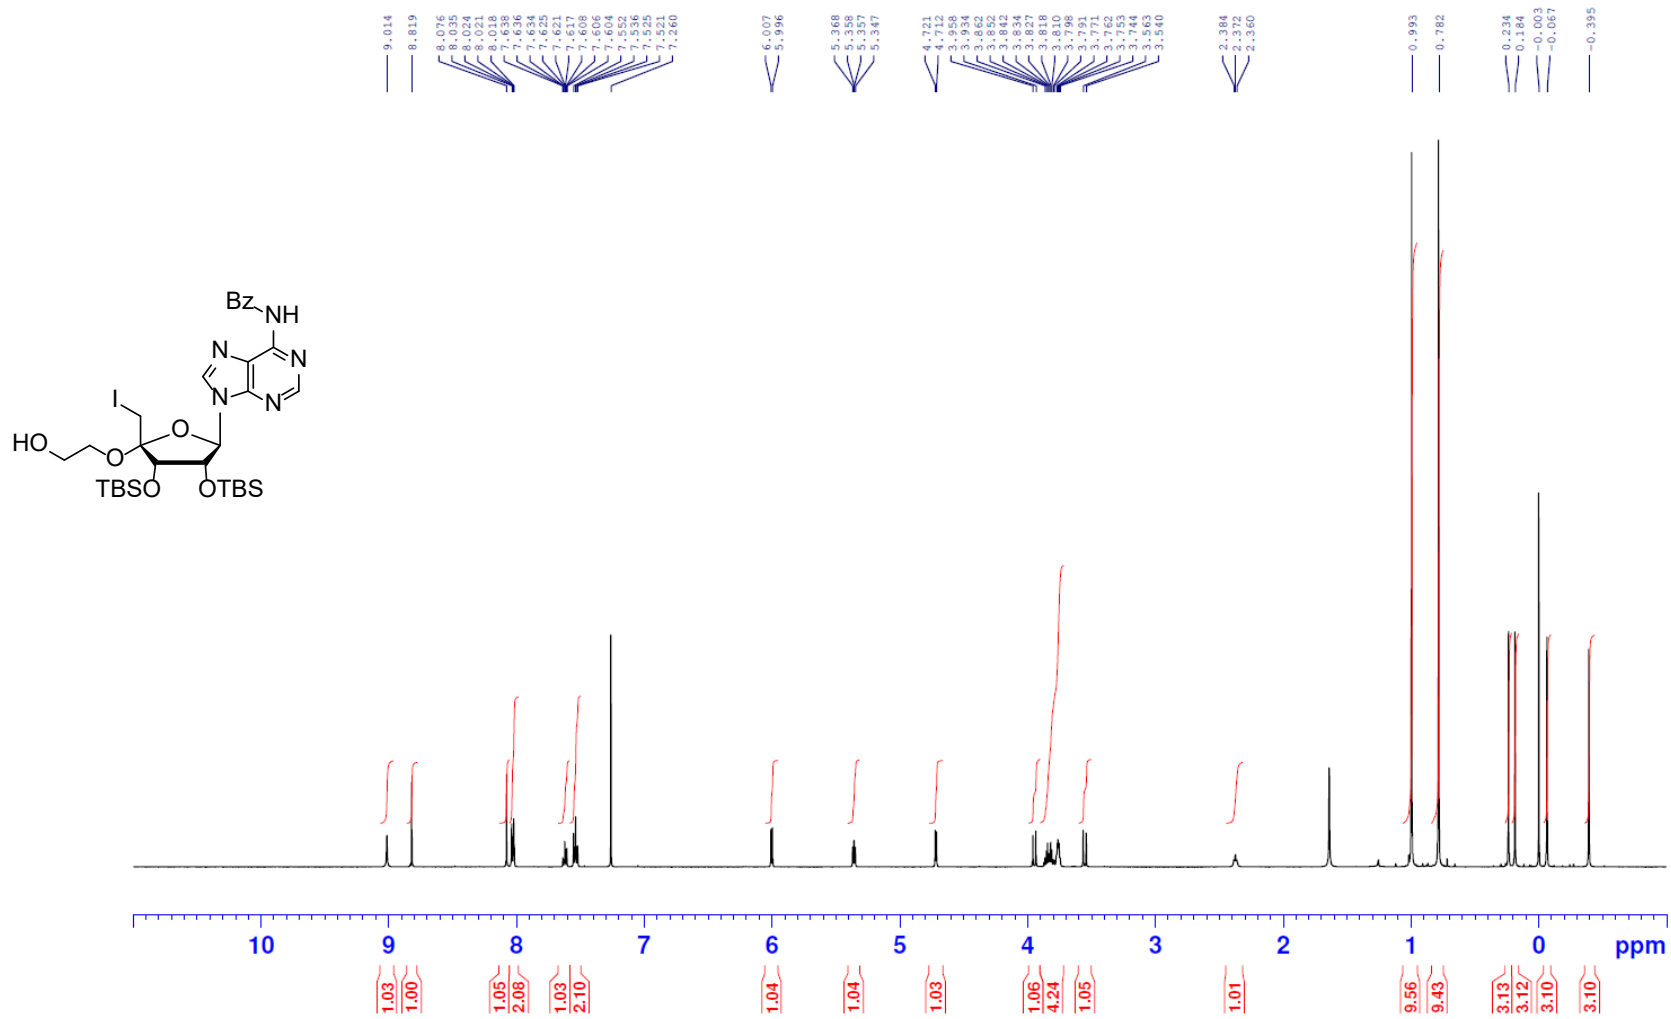

Compound **7a** (125 MHz  $^{13}\text{C}$  NMR in  $\text{CDCl}_3$ )

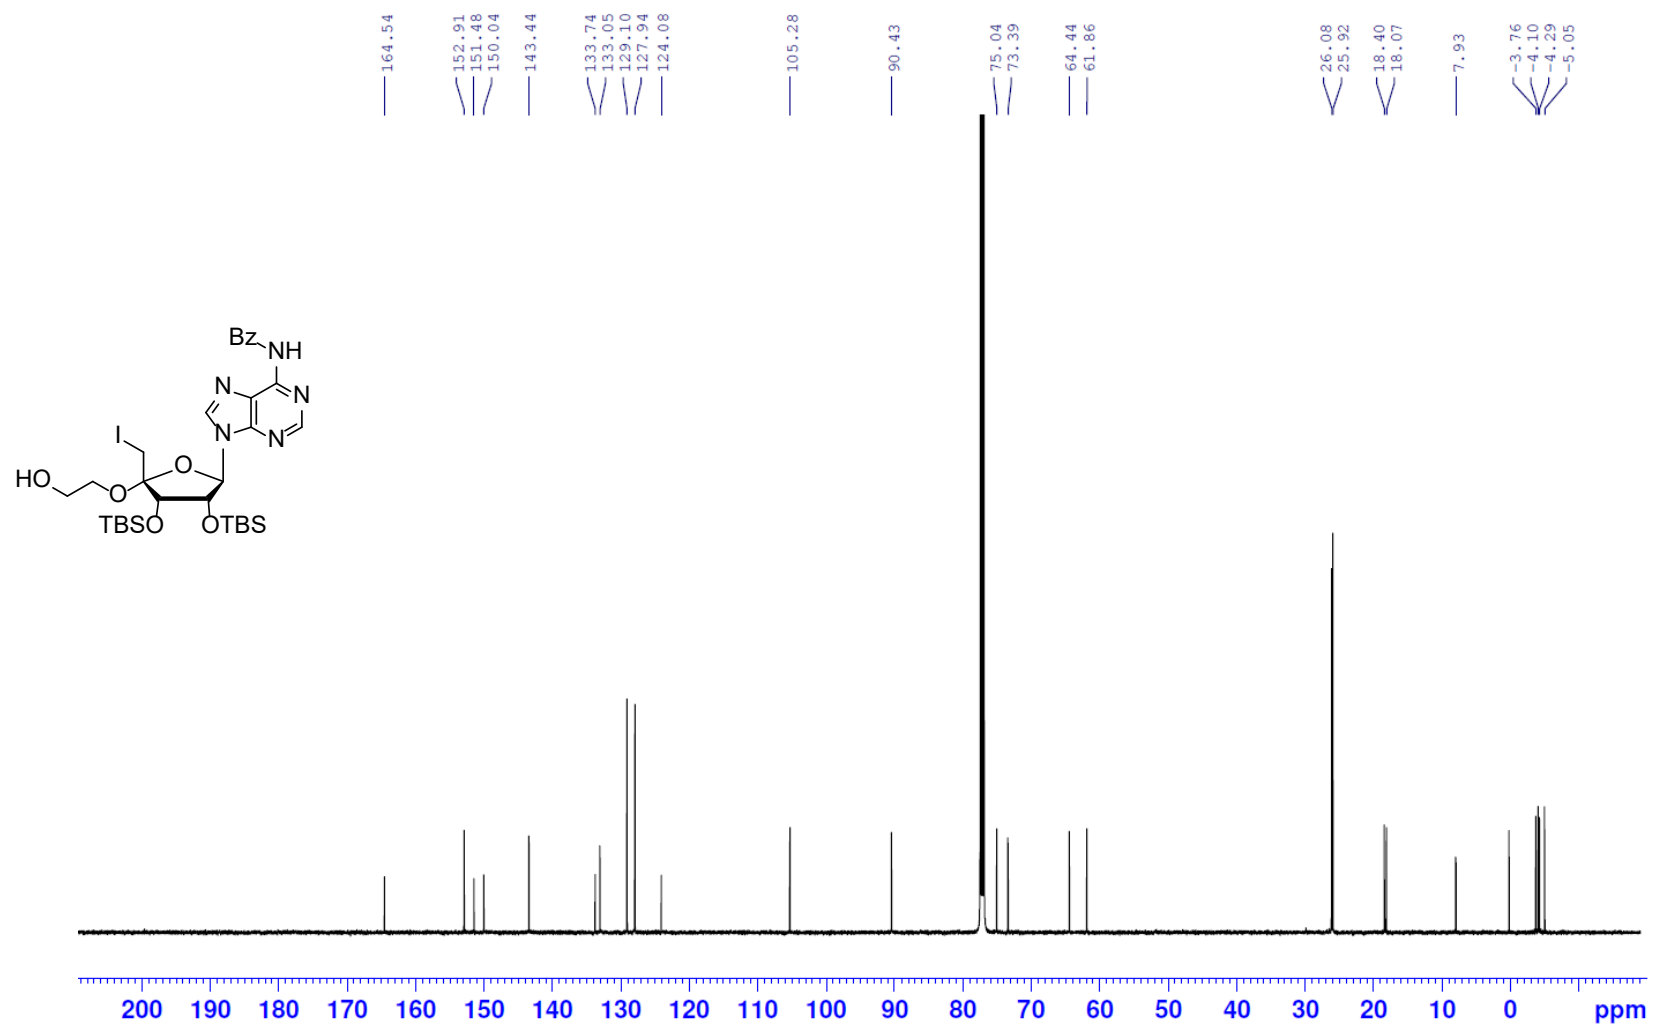



Compound **7b** (500 MHz  $^1\text{H}$  NMR in  $\text{CDCl}_3$ )

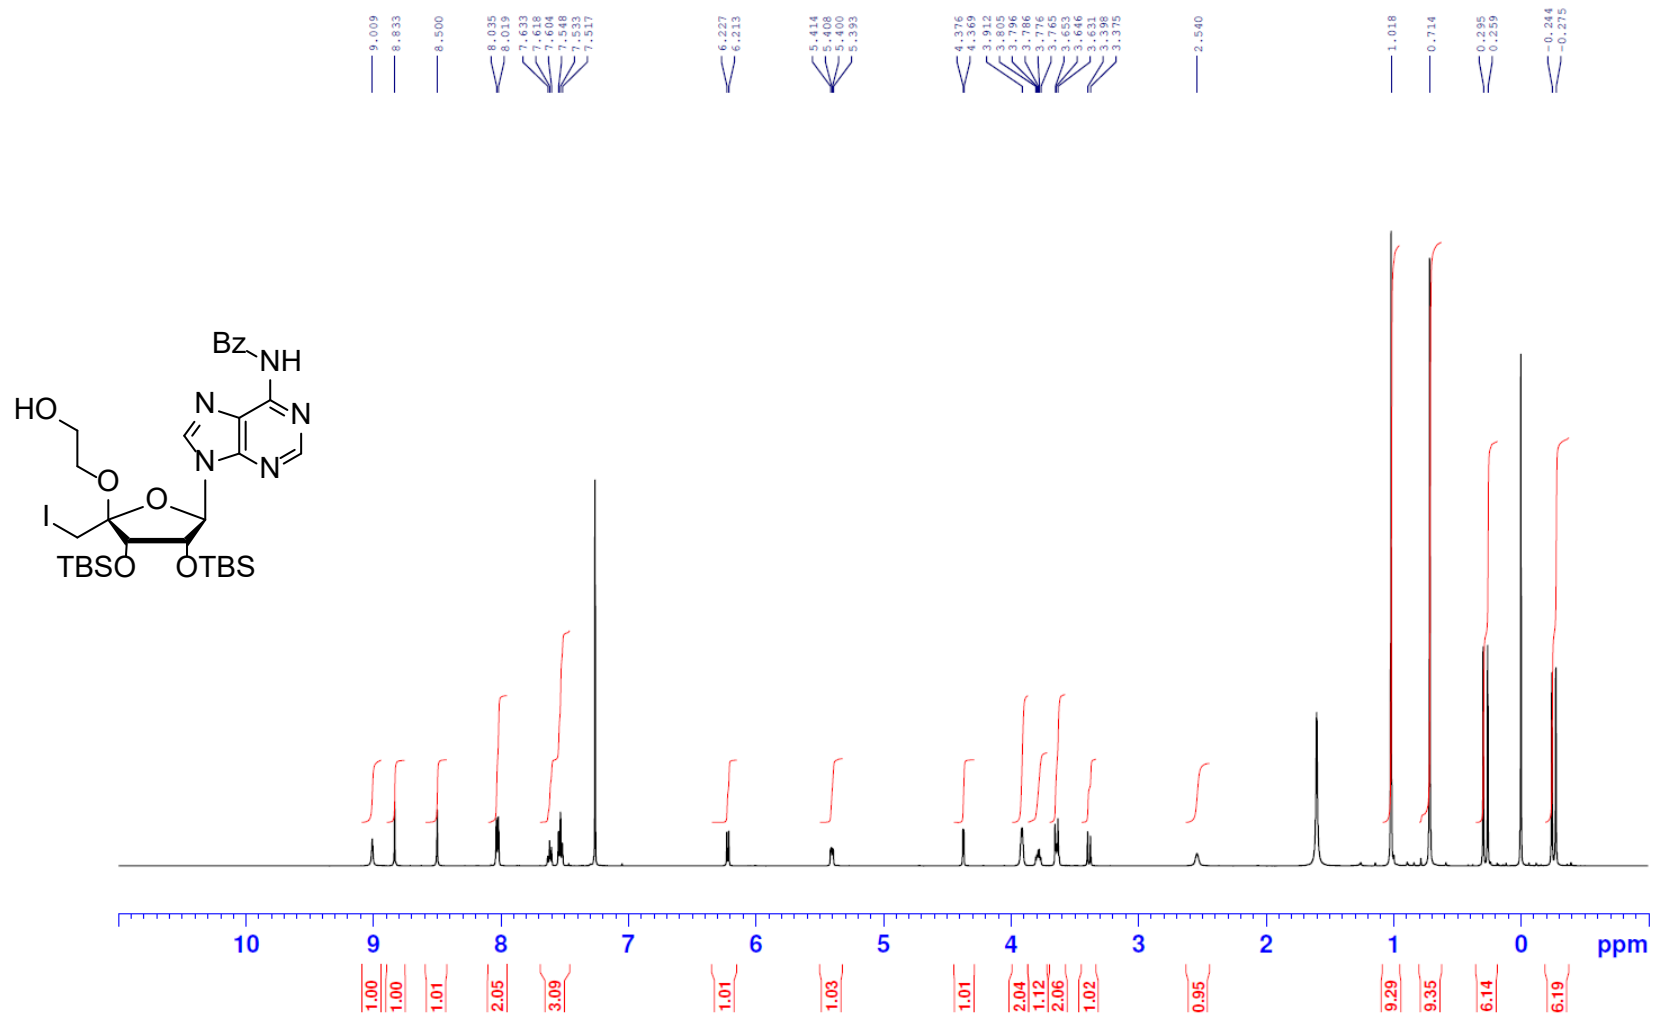

Compound **7b** (125 MHz  $^{13}\text{C}$  NMR in  $\text{CDCl}_3$ )

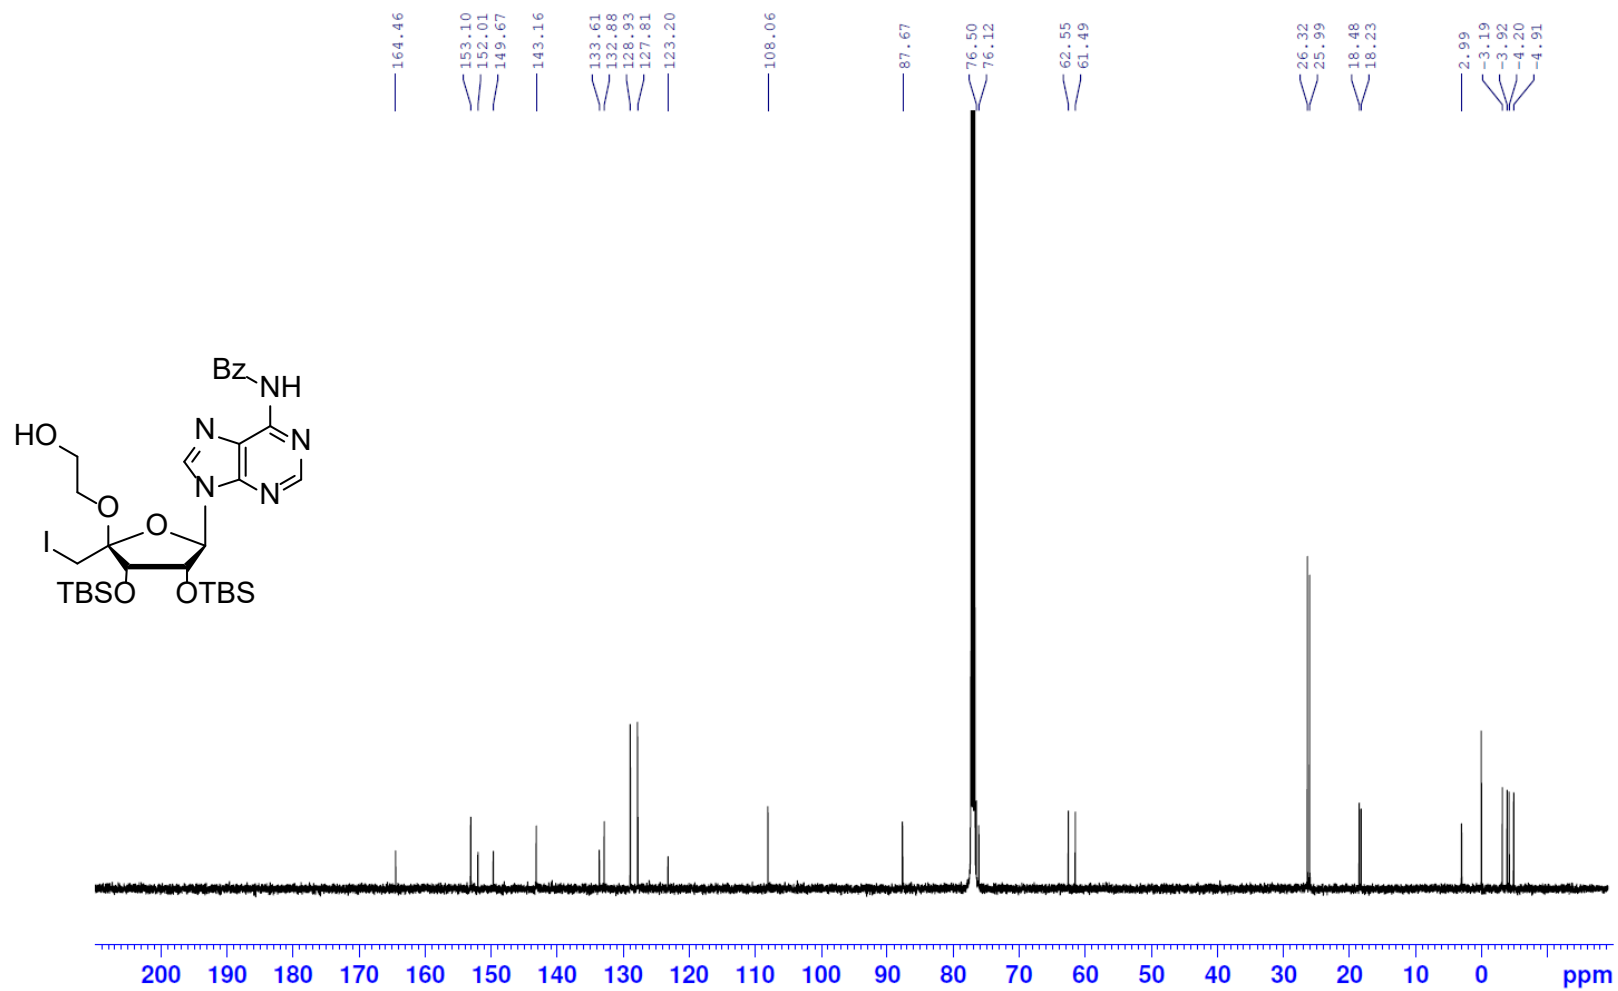

Compound **8** (500 MHz  $^1\text{H}$  NMR in  $\text{CDCl}_3$ )

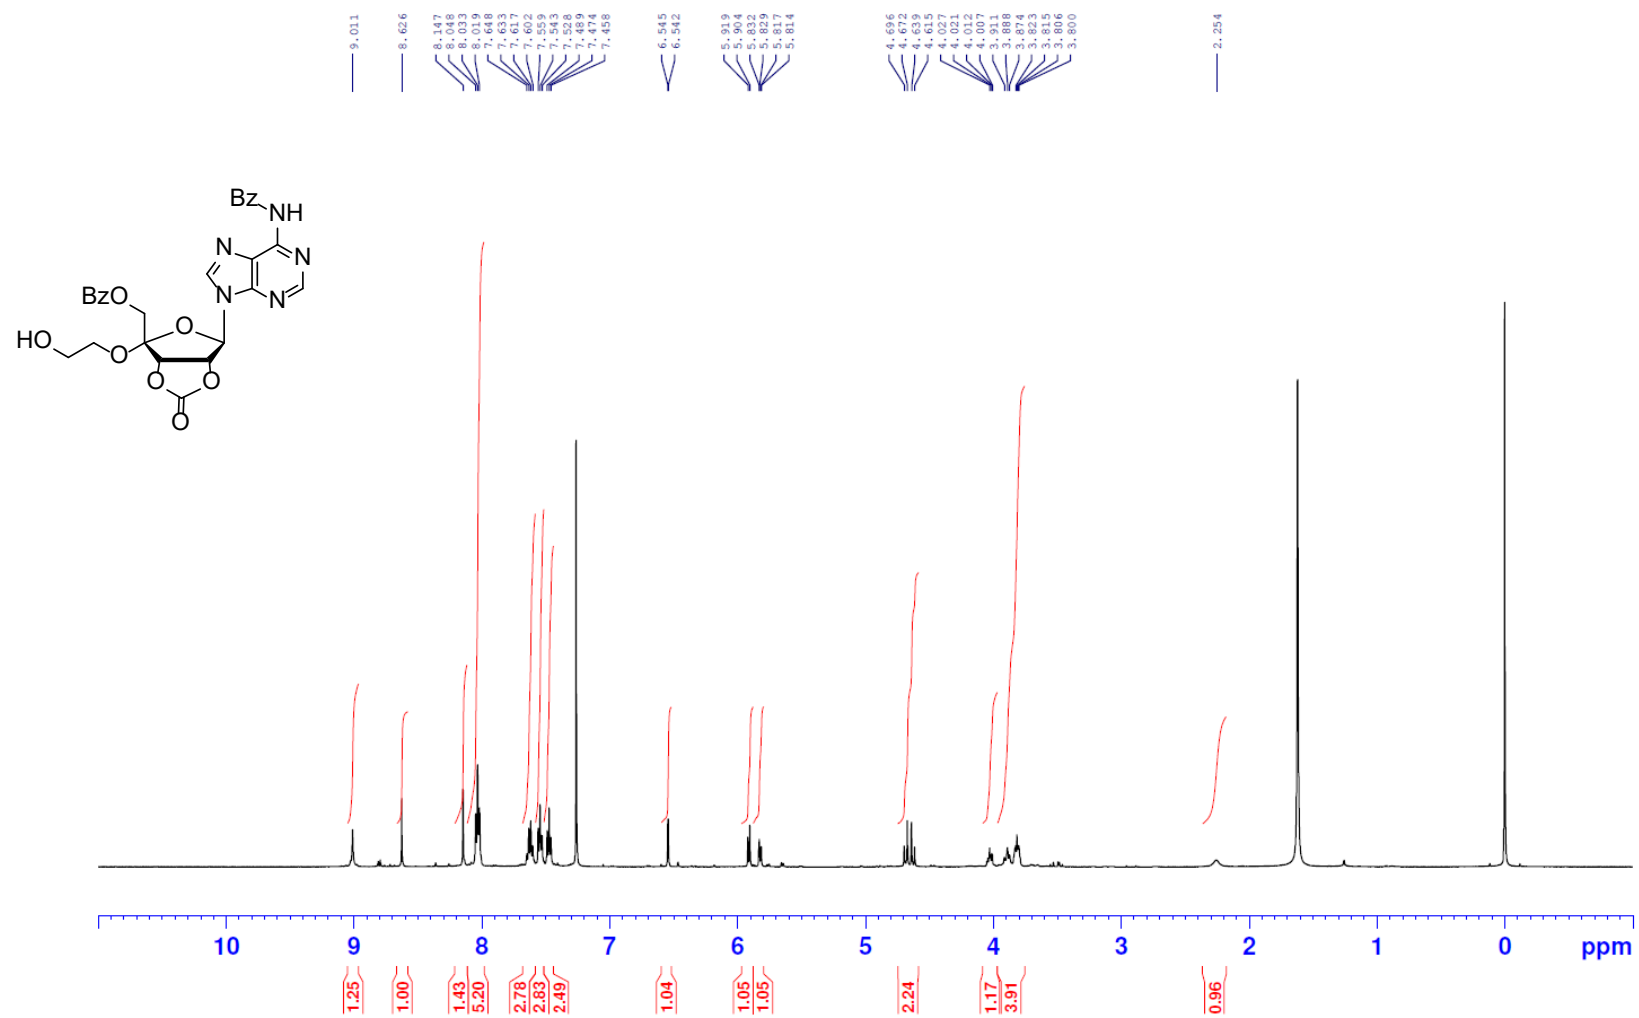

Compound **8** (125 MHz  $^{13}\text{C}$  NMR in  $\text{CDCl}_3$ )

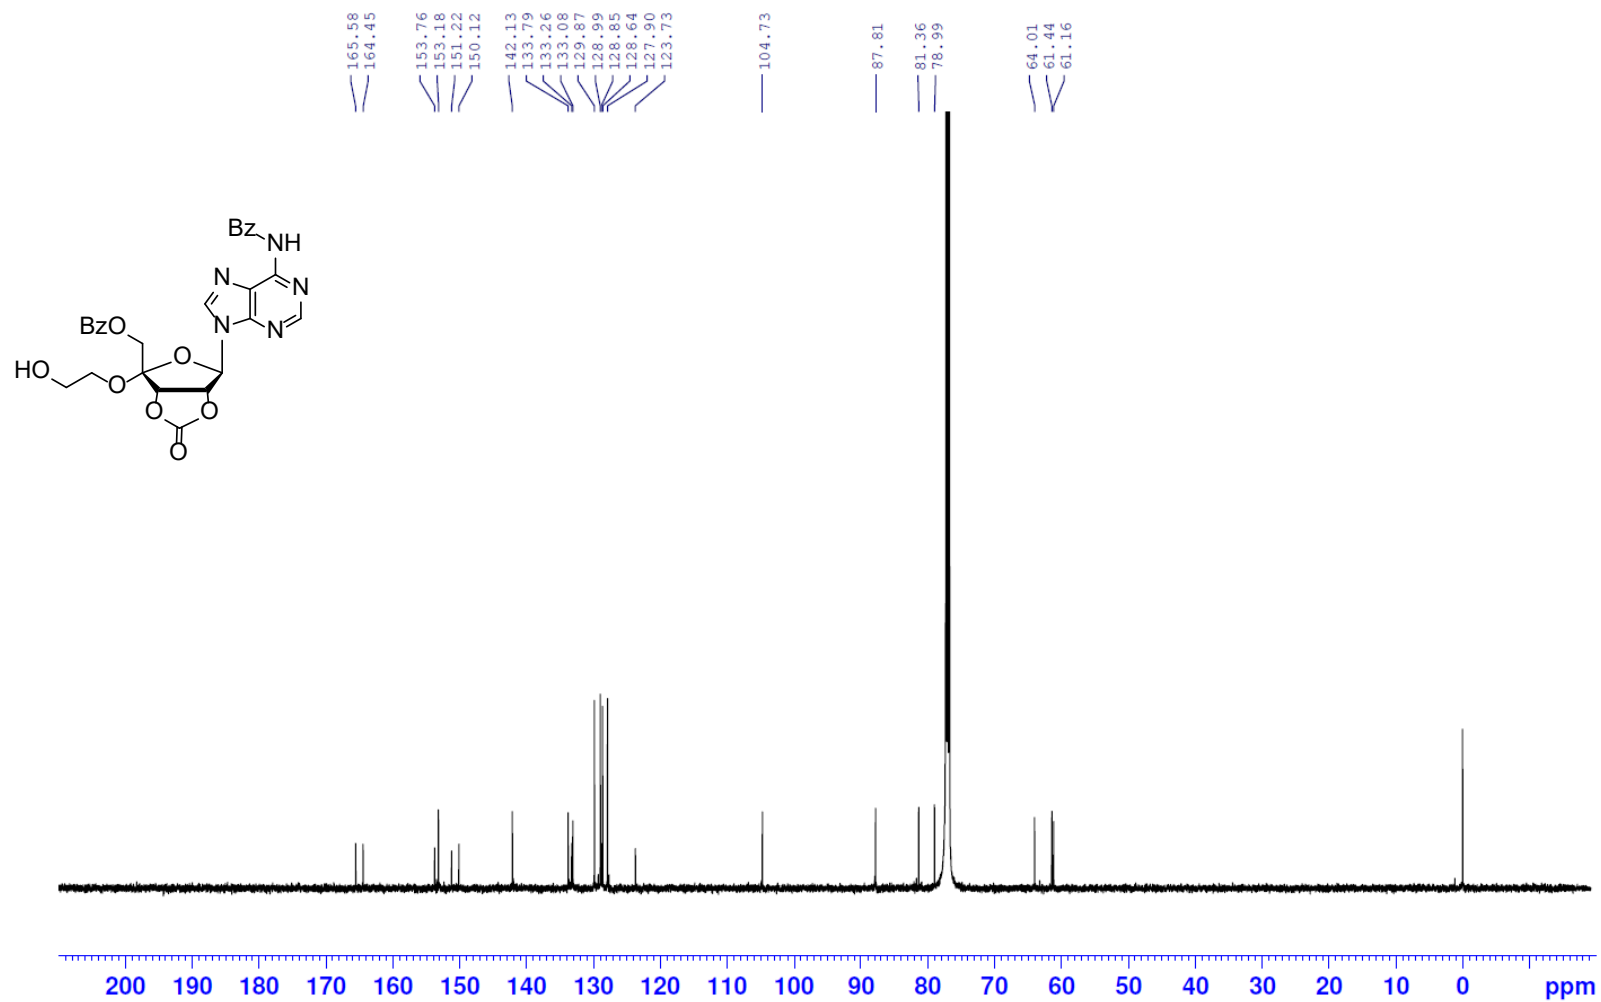

Compound 9 (500 MHz  $^1\text{H}$  NMR in  $\text{CDCl}_3$ )

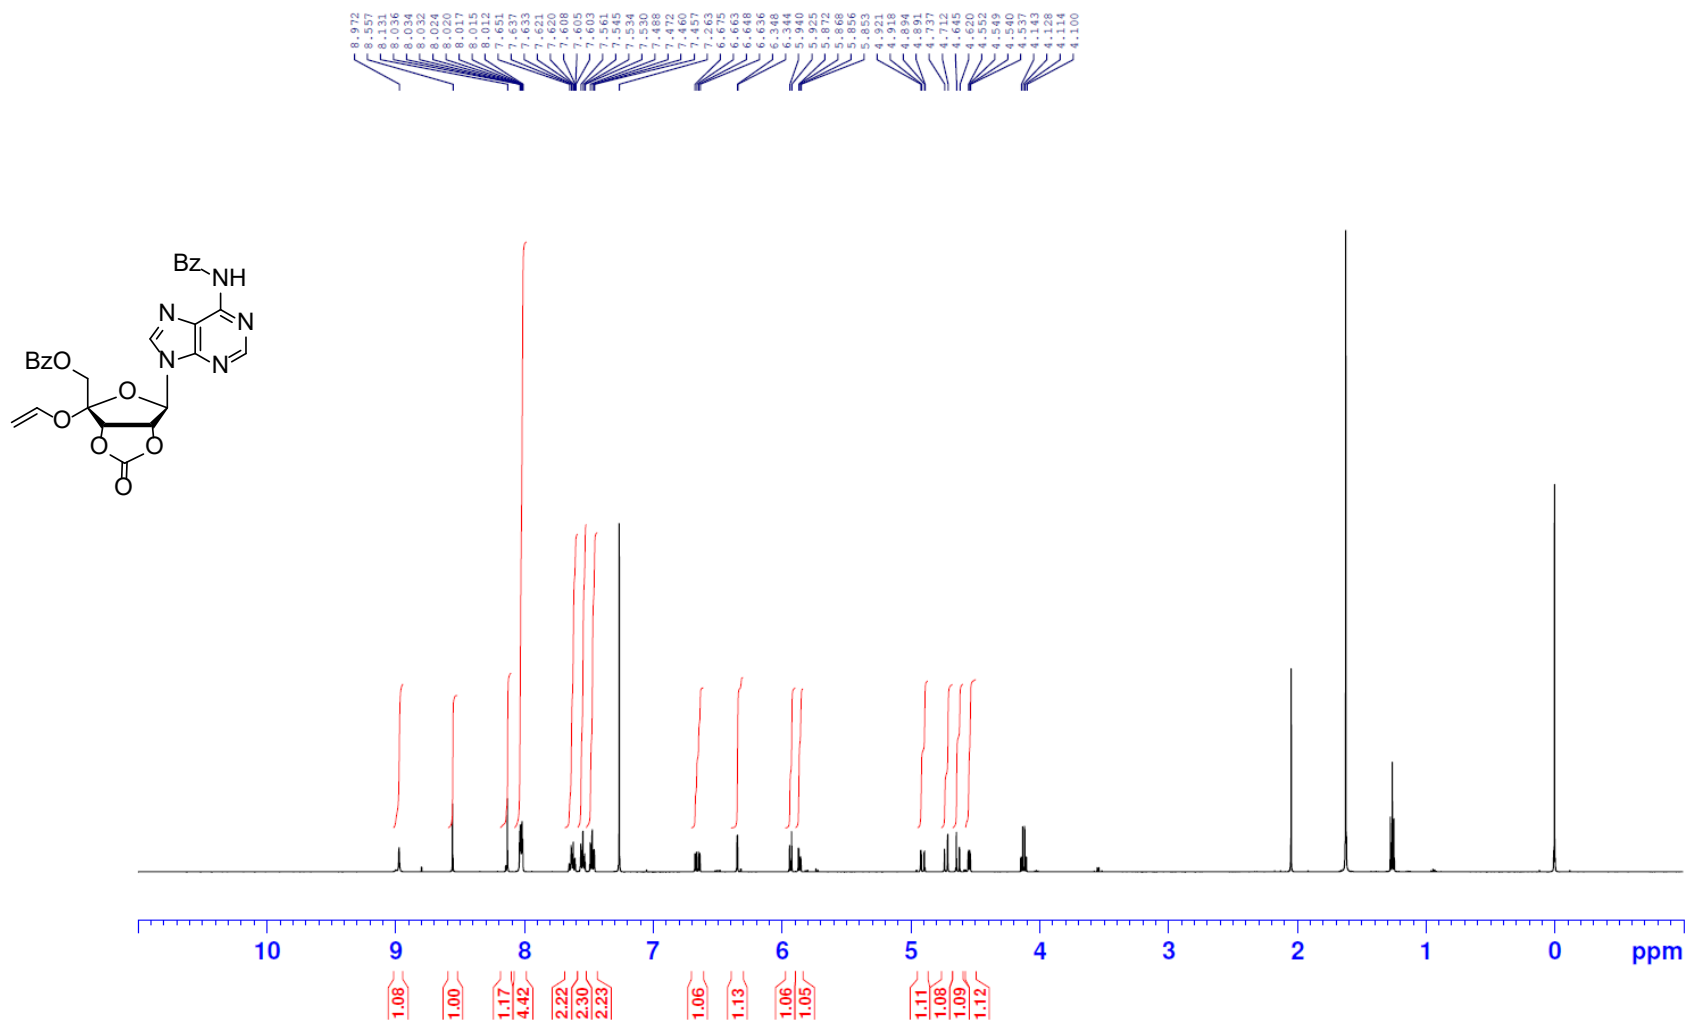

Compound 9 (125 MHz  $^{13}\text{C}$  NMR in  $\text{CDCl}_3$ )

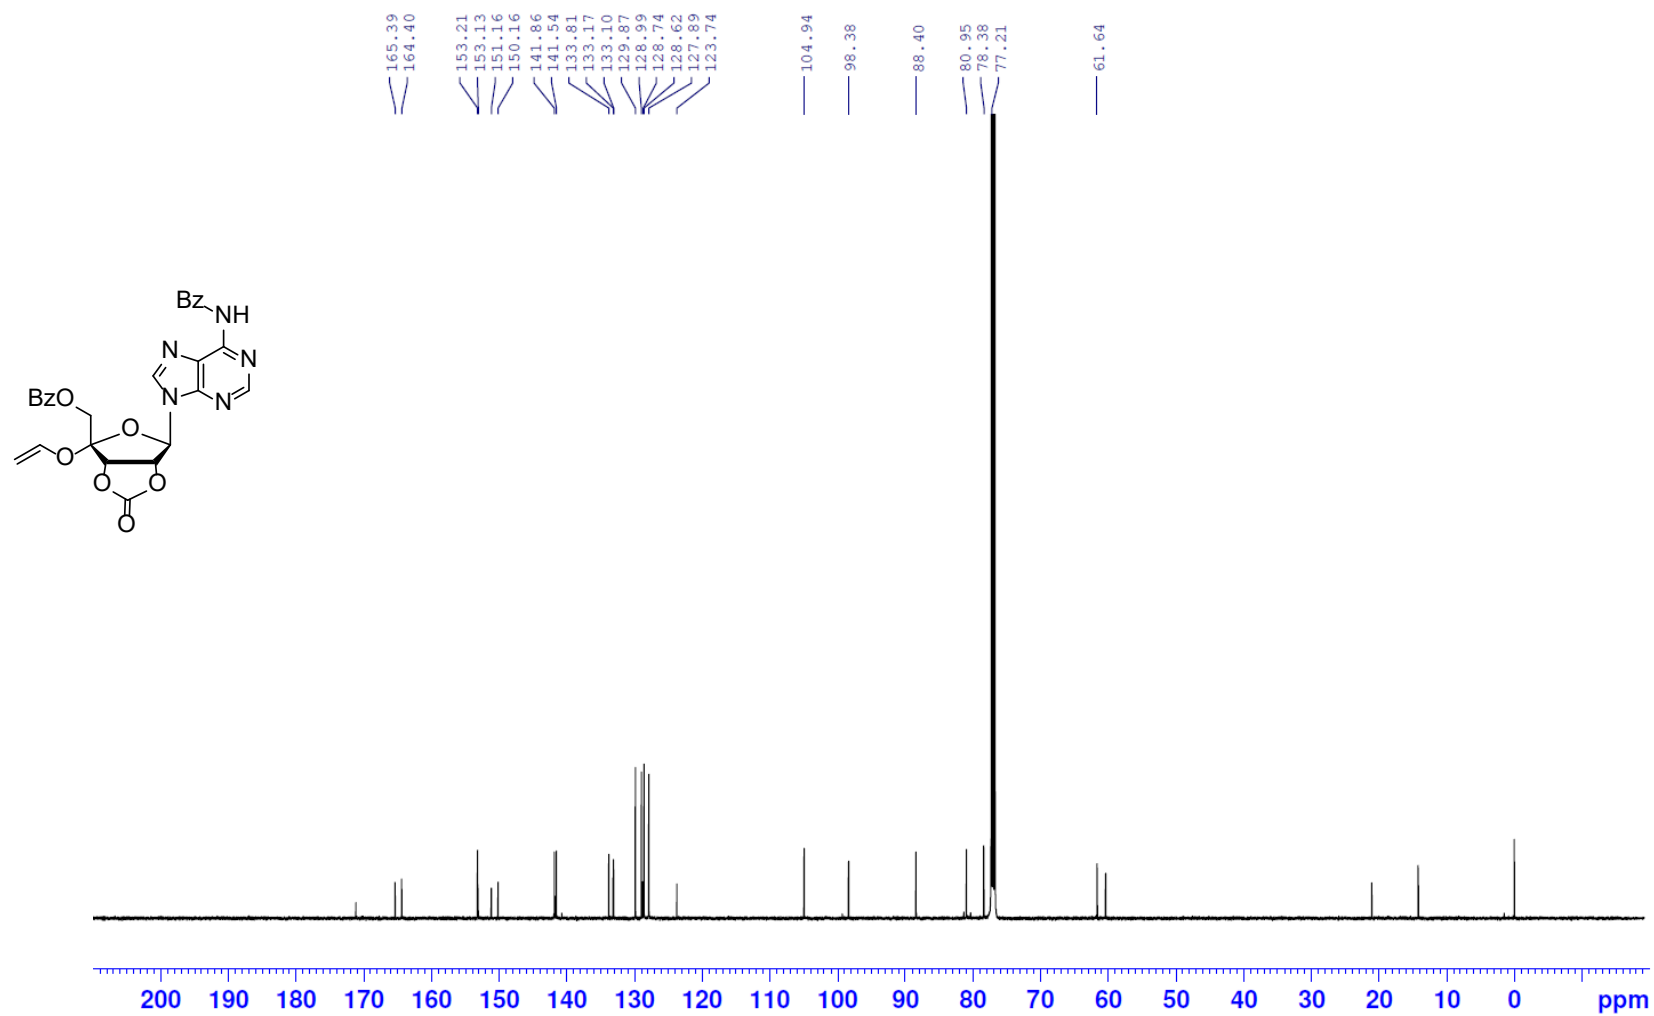

Compound **10** (500 MHz  $^1\text{H}$  NMR in  $\text{CD}_3\text{OD}$ )

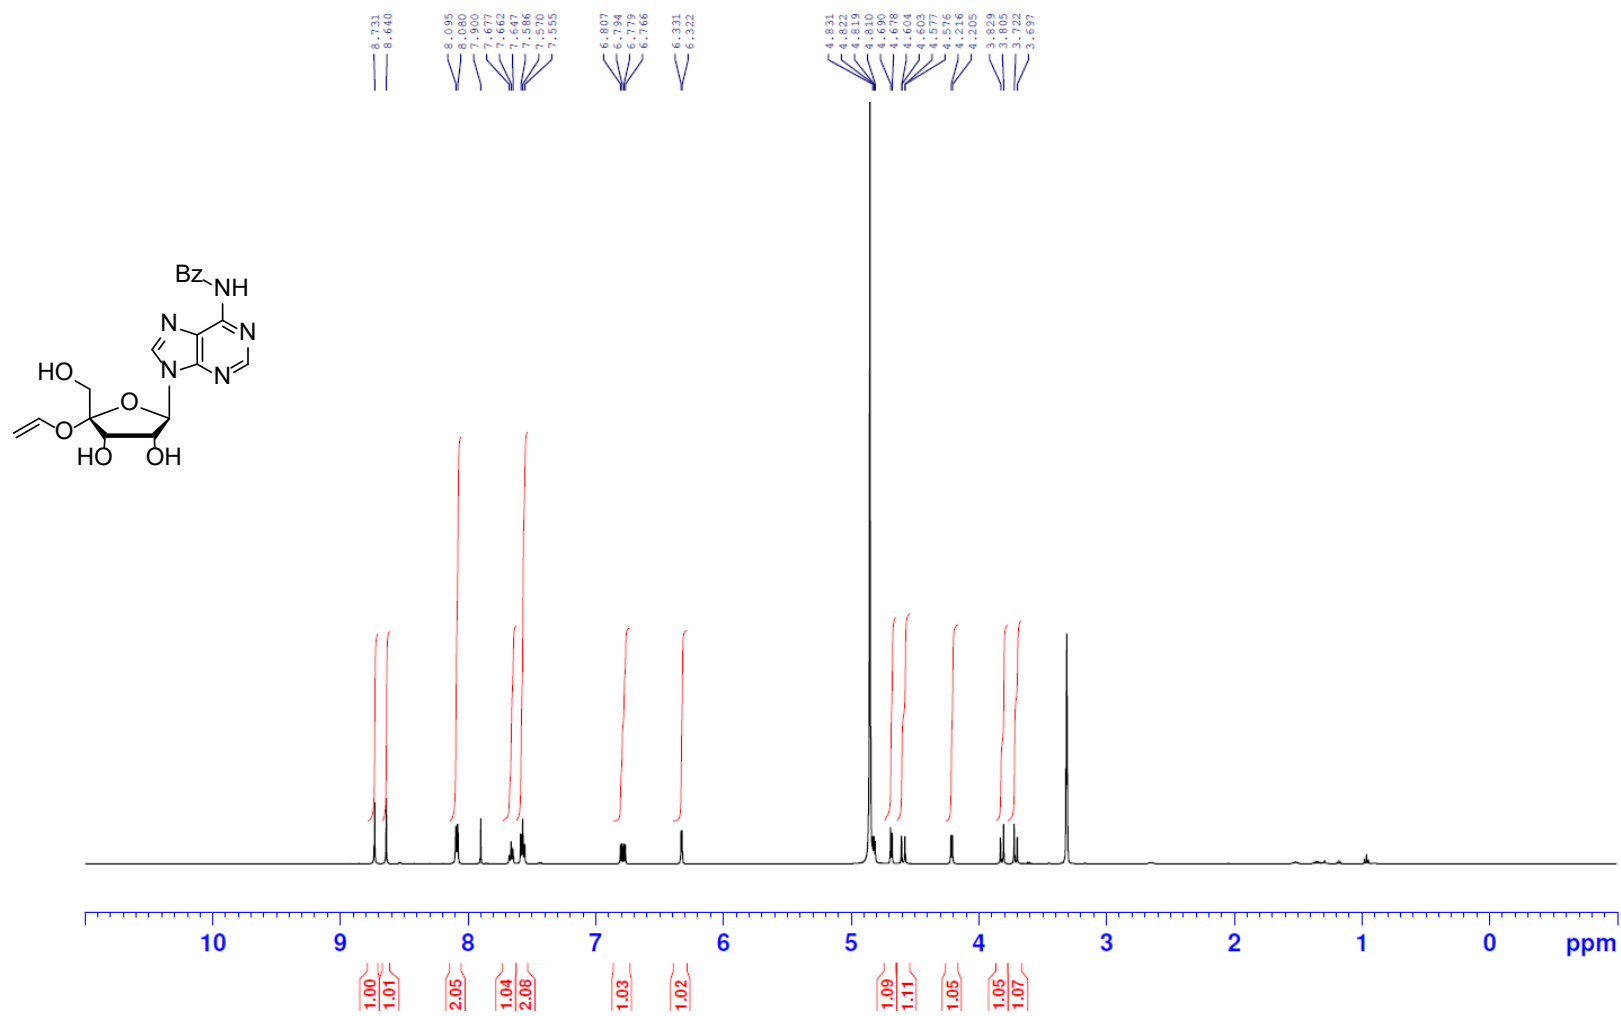

Compound **10** (125 MHz  $^{13}\text{C}$  NMR in  $\text{CD}_3\text{OD}$ )

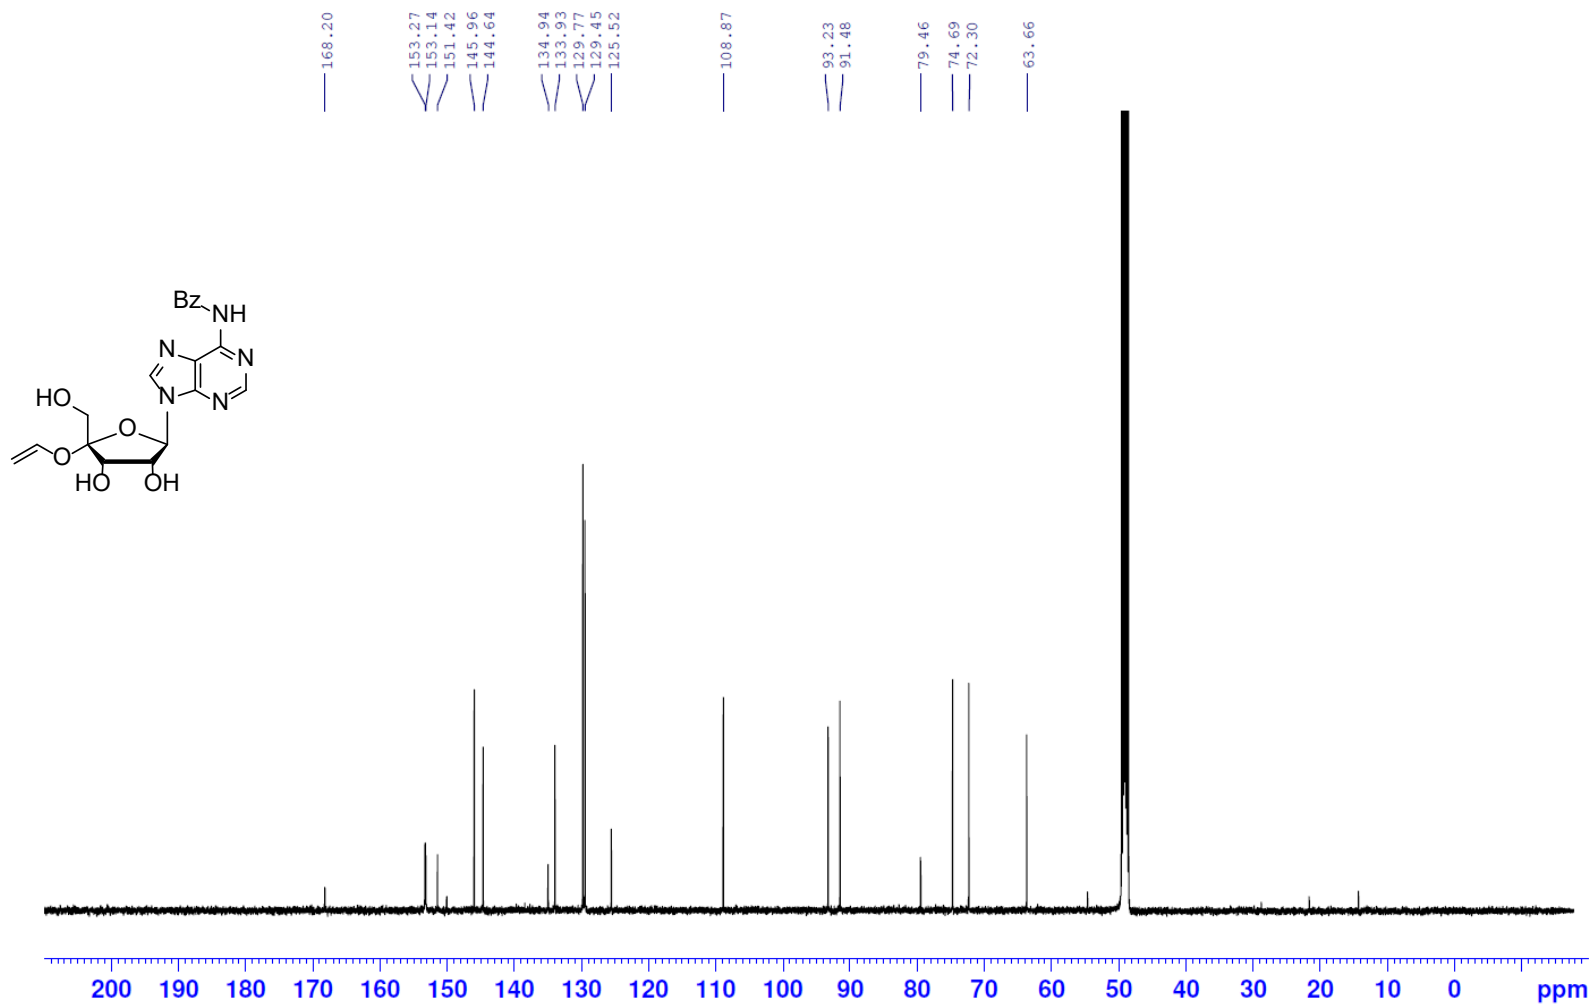



Compound **11** (500 MHz  $^1\text{H}$  NMR in  $\text{CDCl}_3$ )

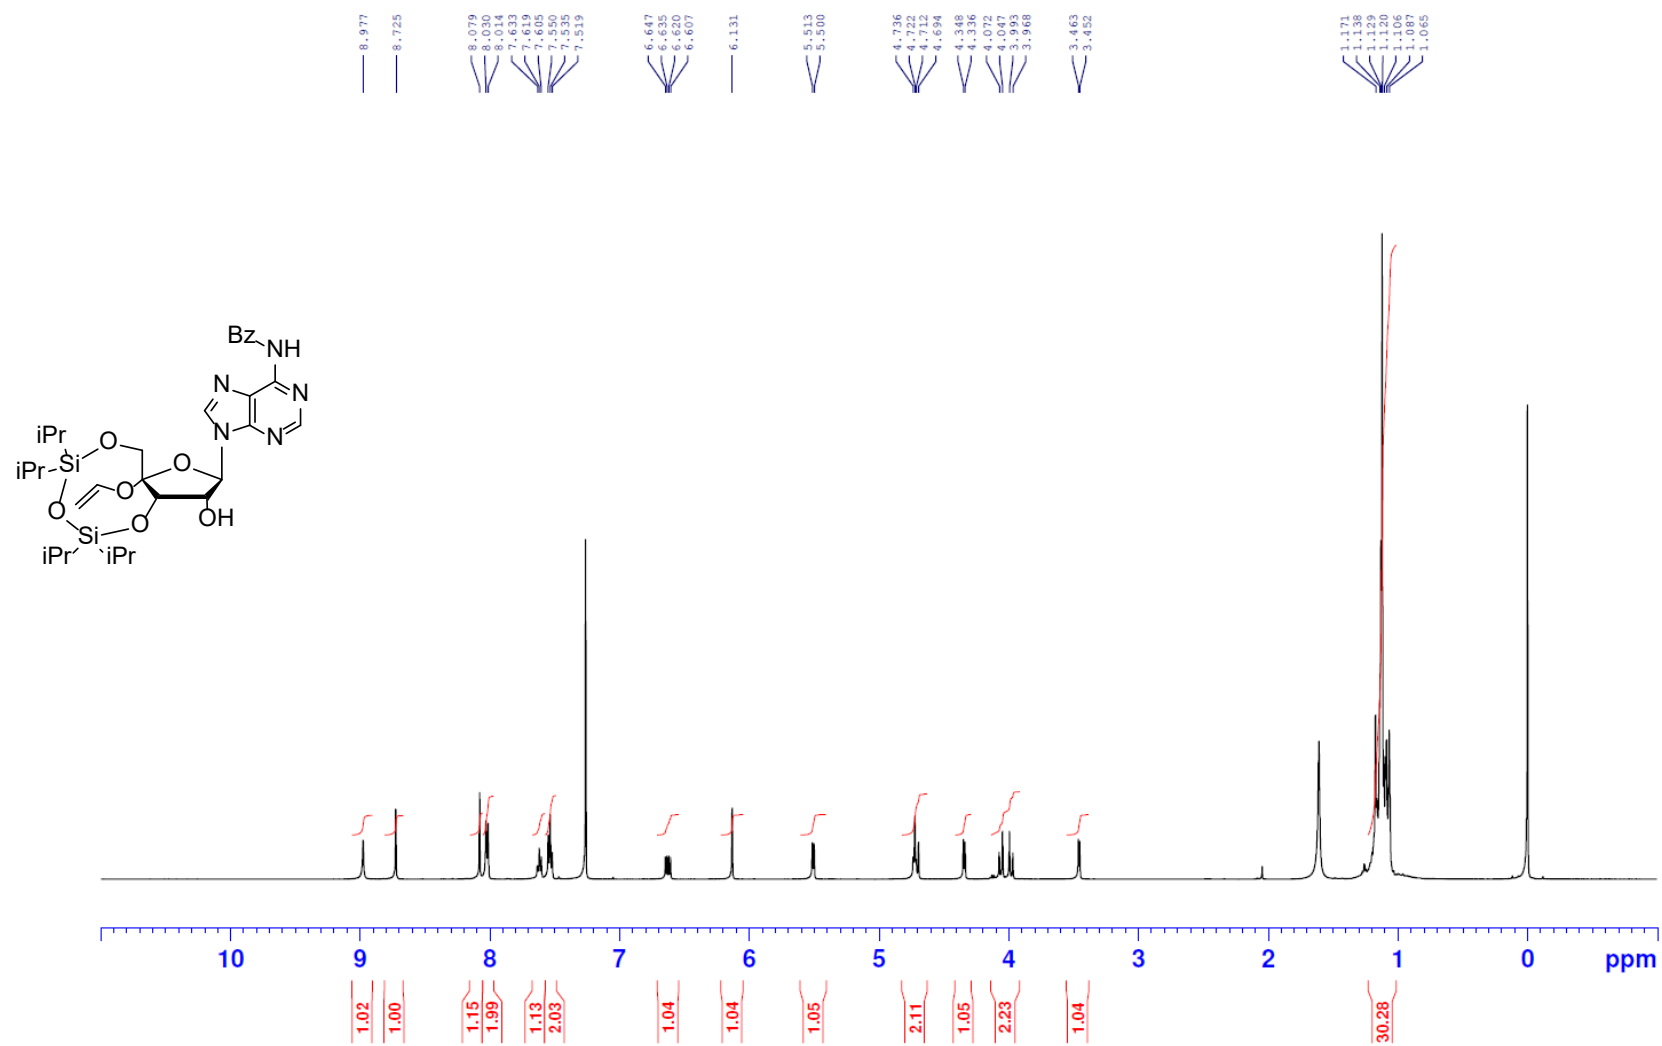

Compound **11** (125 MHz  $^{13}\text{C}$  NMR in  $\text{CDCl}_3$ )

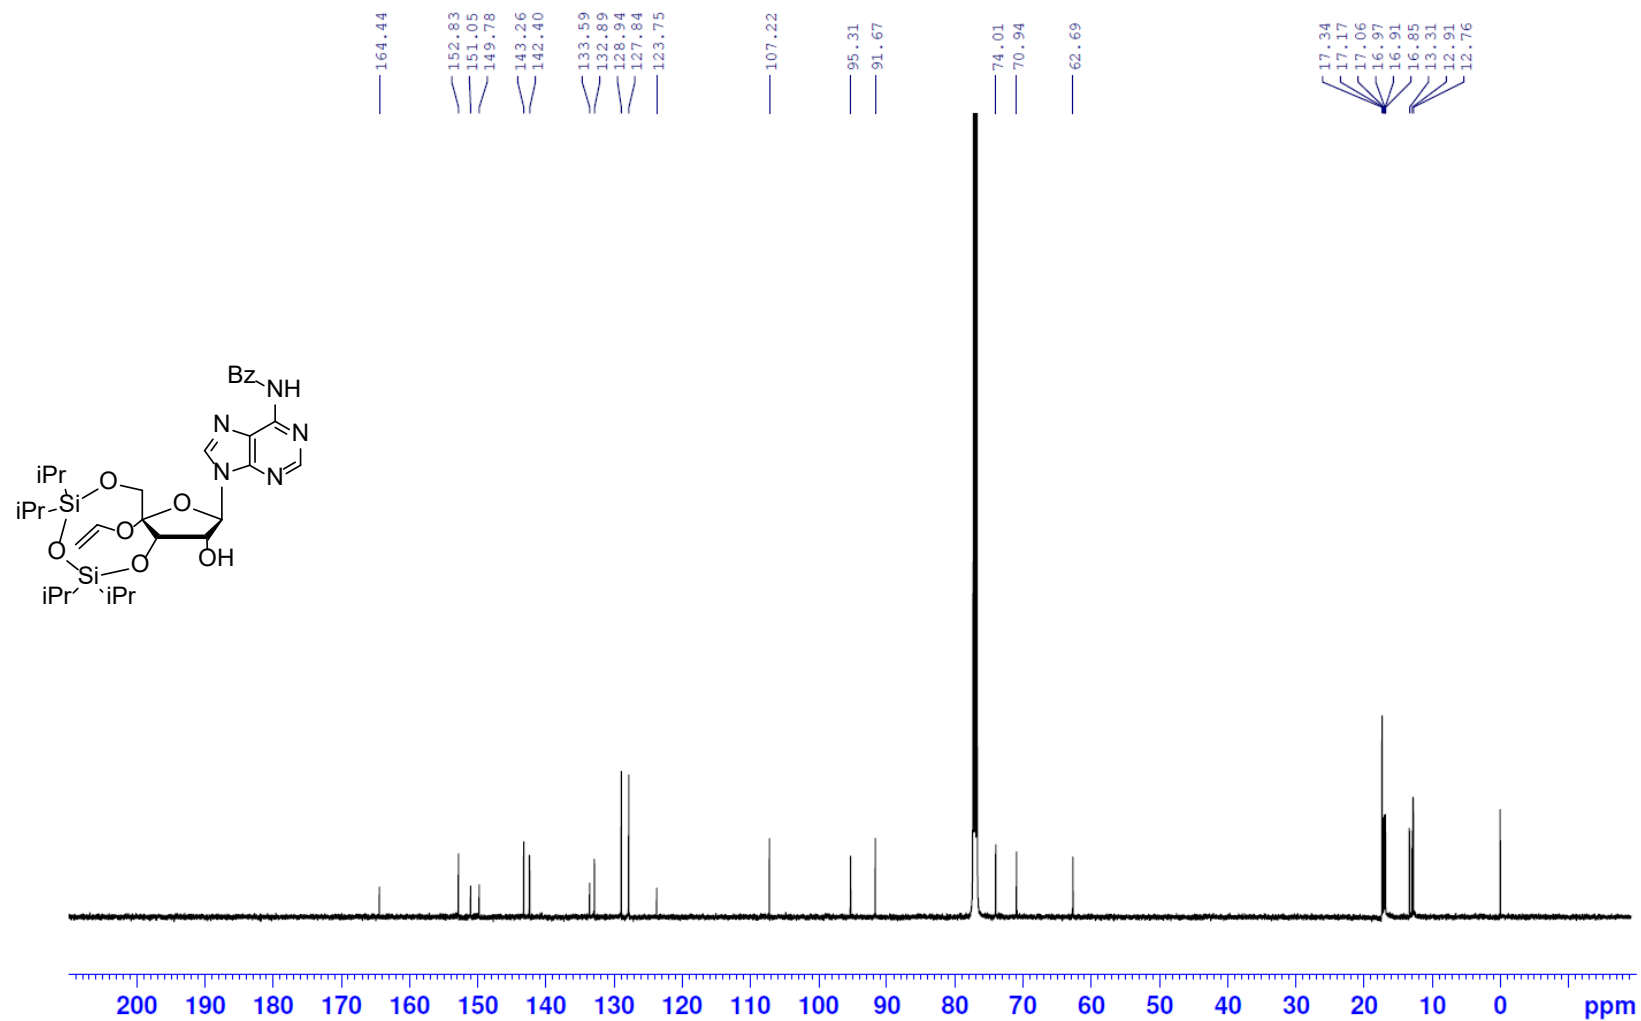

Compound **12** (500 MHz  $^1\text{H}$  NMR in  $\text{DMSO-}d_6$ )

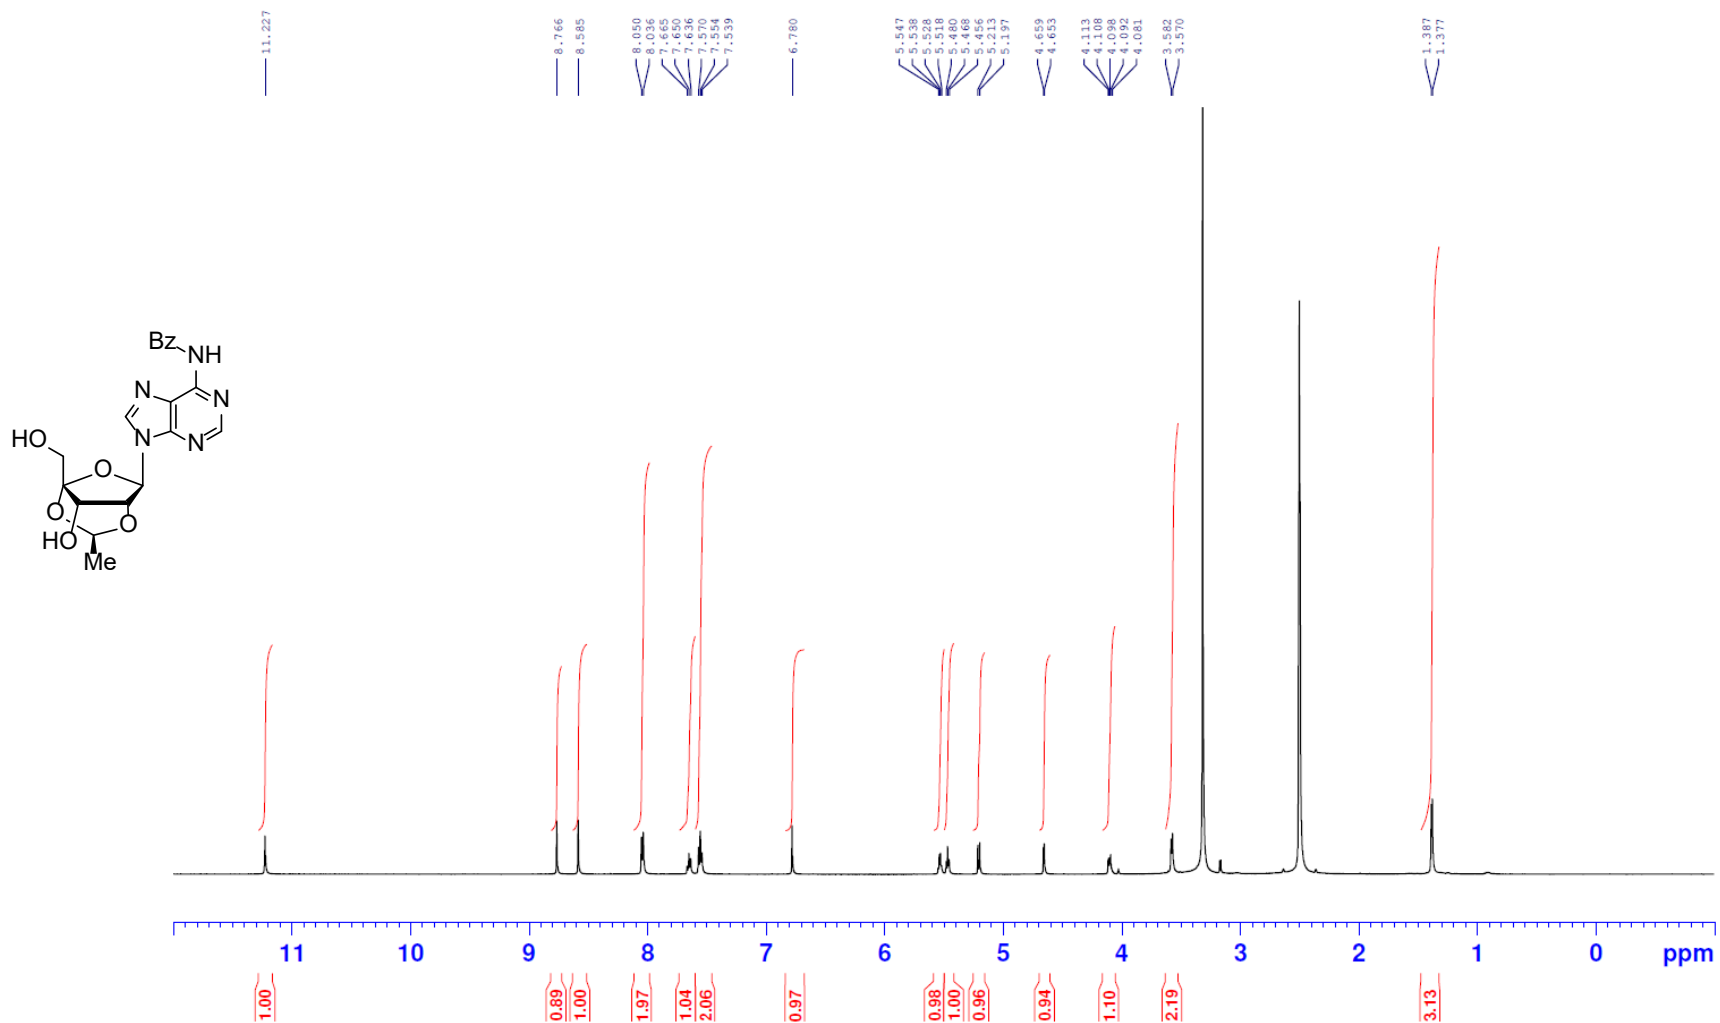

Compound **12** (125 MHz  $^{13}\text{C}$  NMR in  $\text{DMSO-}d_6$ )

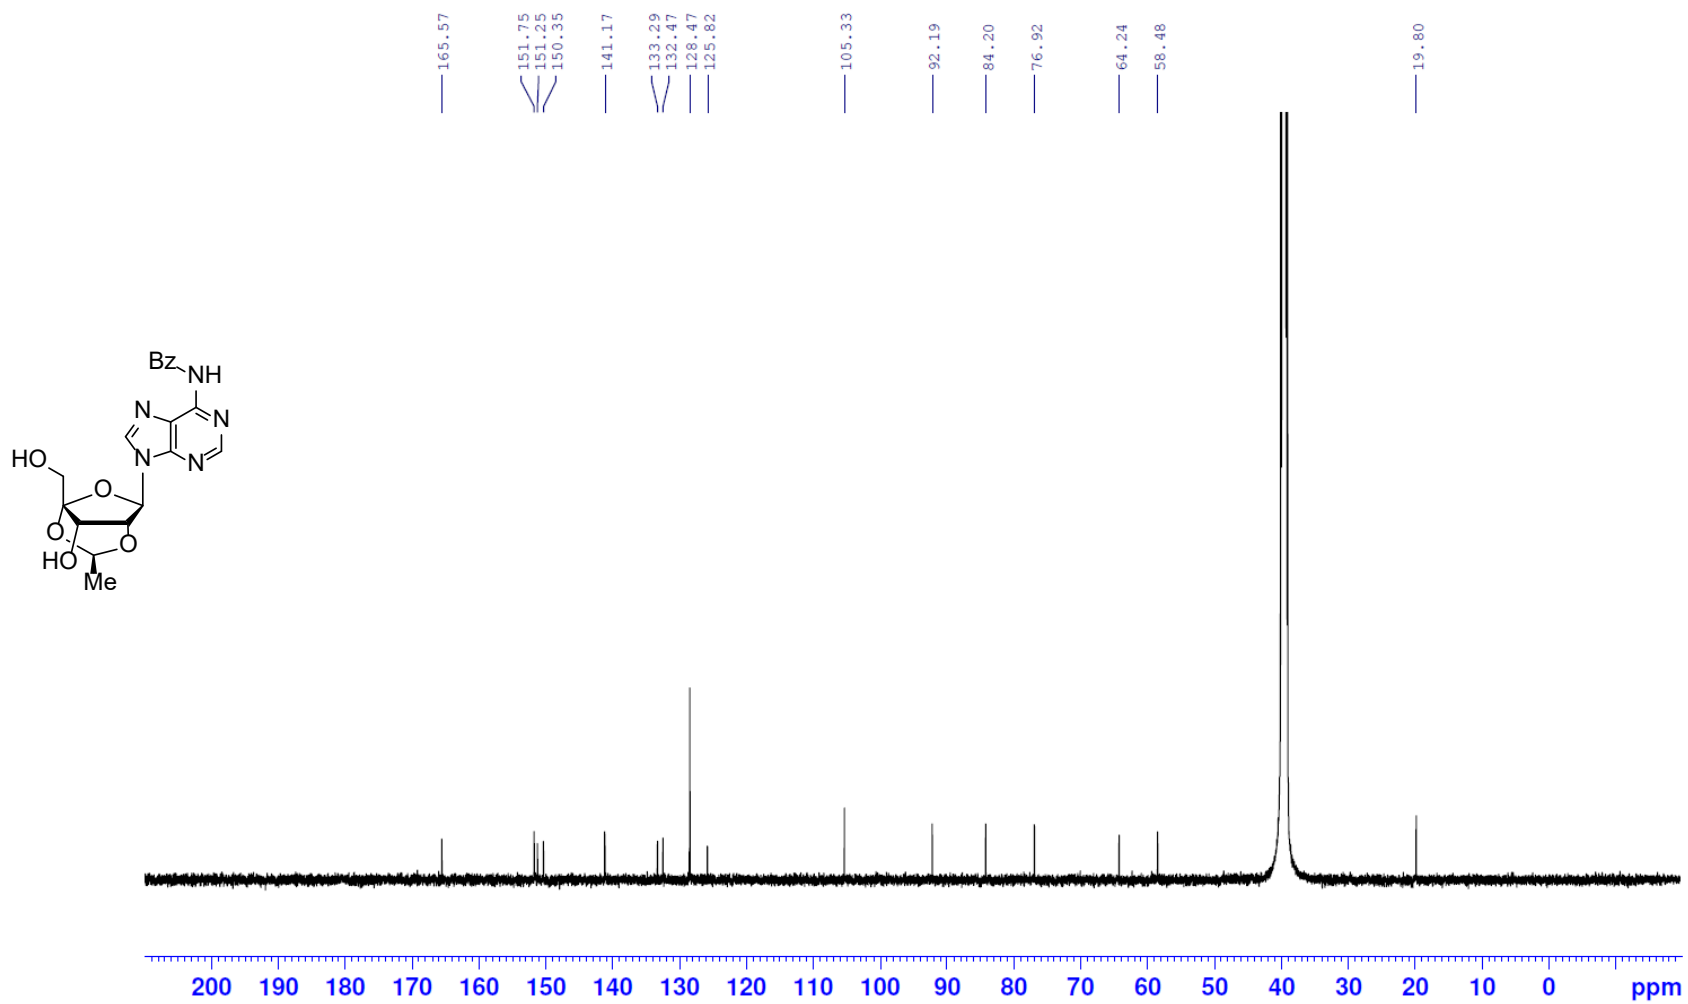

5'-O-DMTr-intermediate of adenosine compound (500 MHz <sup>1</sup>H NMR in CDCl<sub>3</sub>)

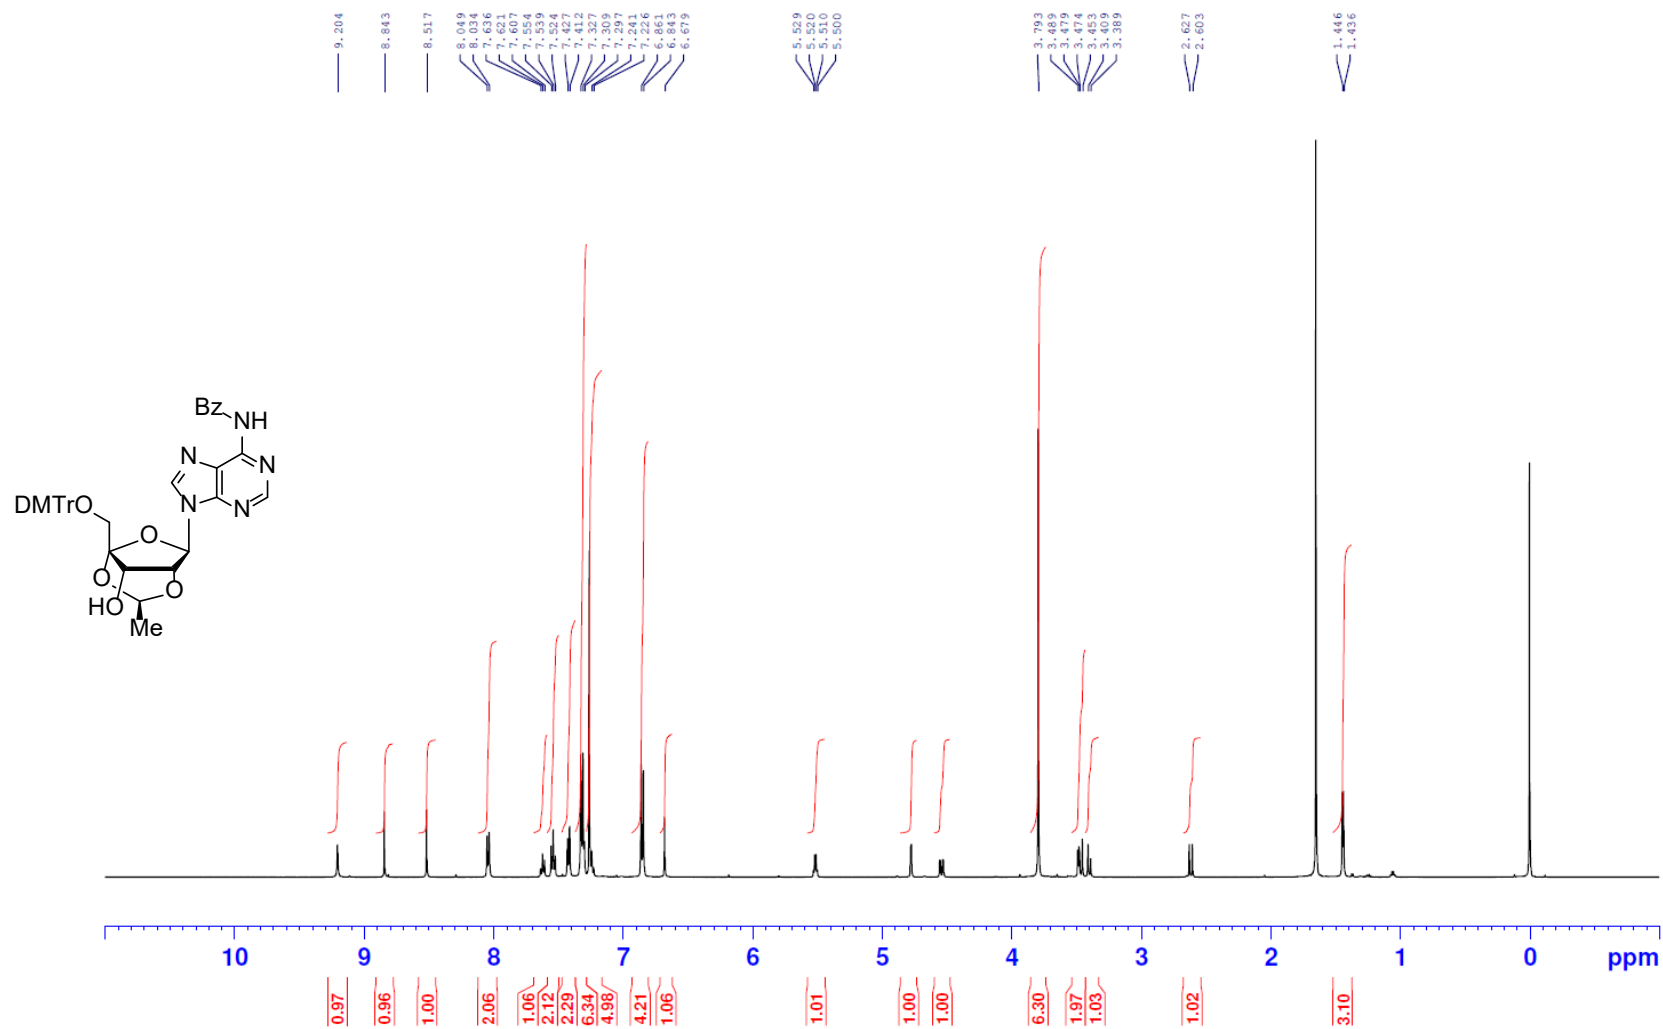

5'-O-DMTr-intermediate of adenosine compound (125 MHz  $^{13}\text{C}$  NMR in  $\text{CDCl}_3$ )

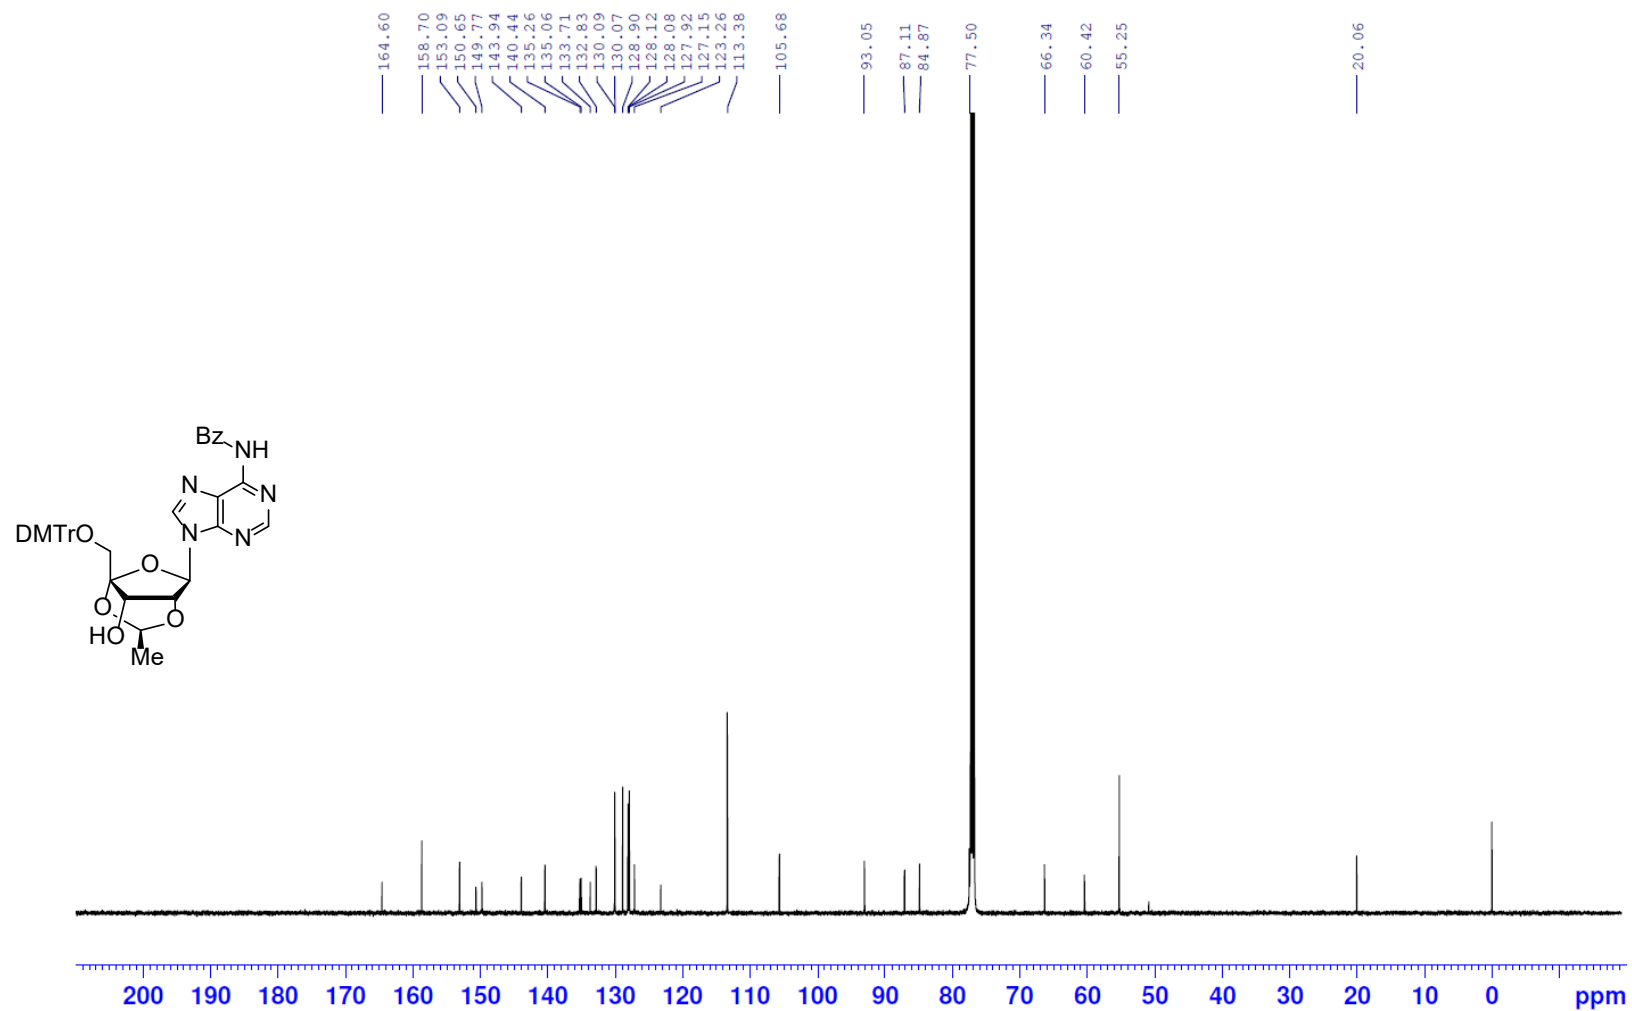

Compound **13** (500 MHz  $^1\text{H}$  NMR in  $\text{CDCl}_3$ )

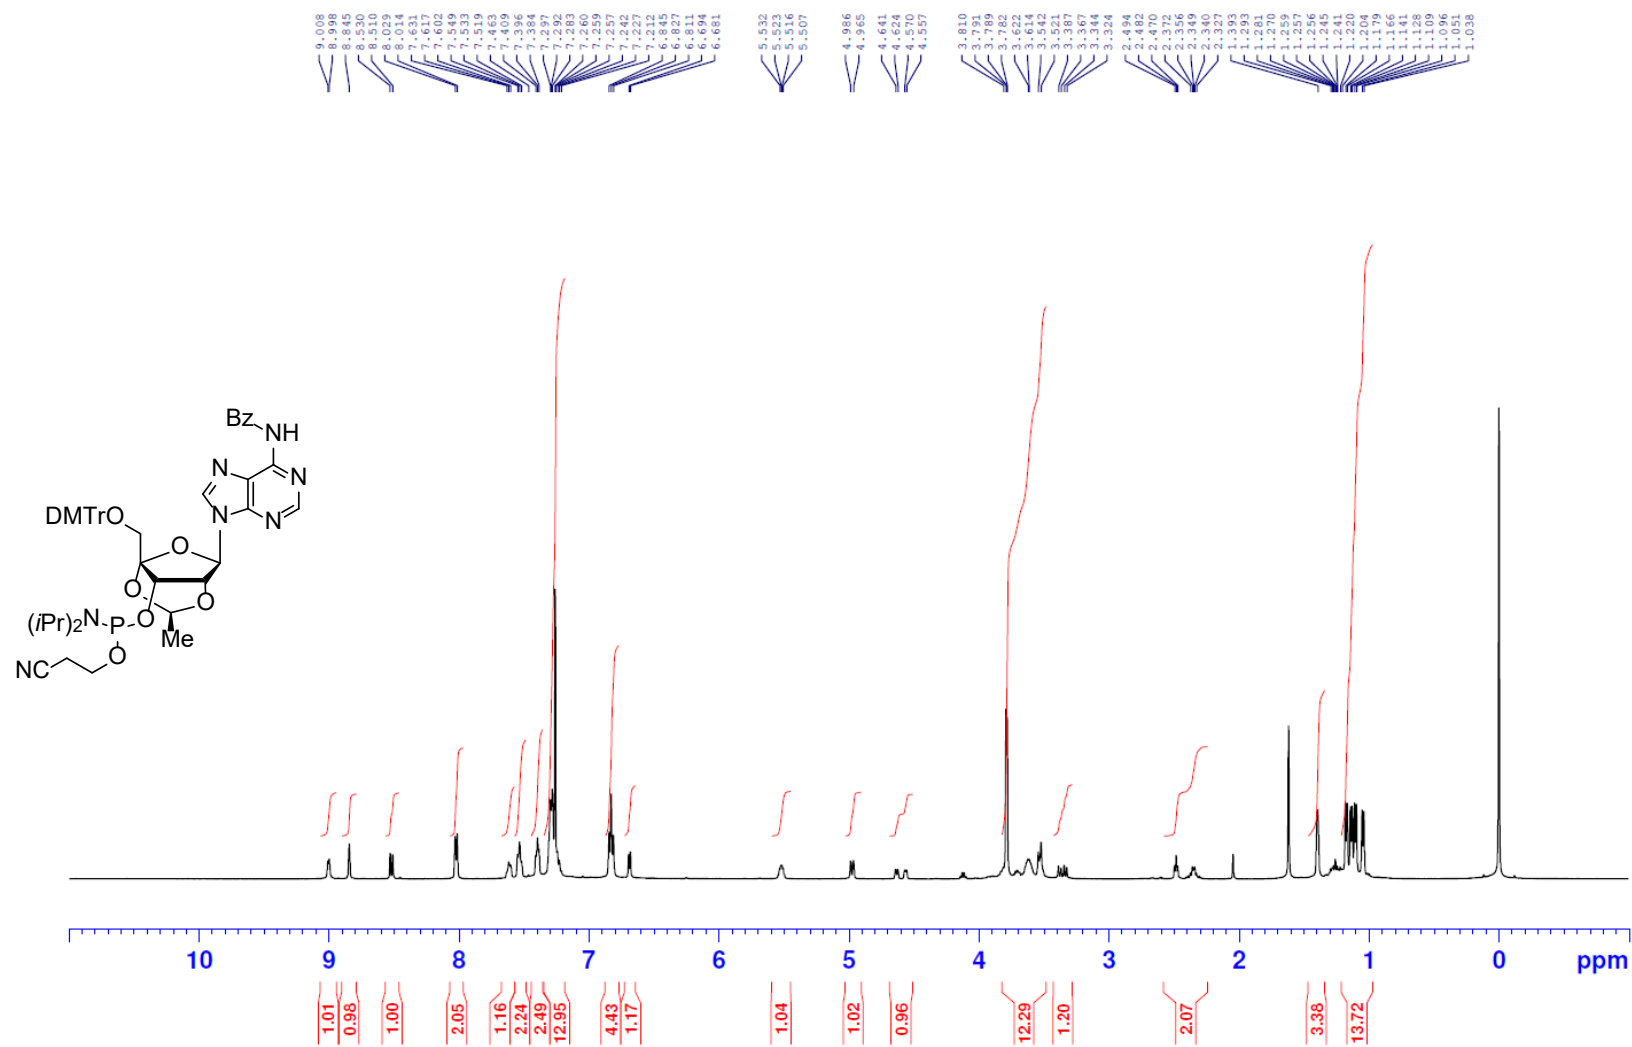

Compound **13** (202 MHz  $^{31}\text{P}$  NMR in  $\text{CDCl}_3$ )

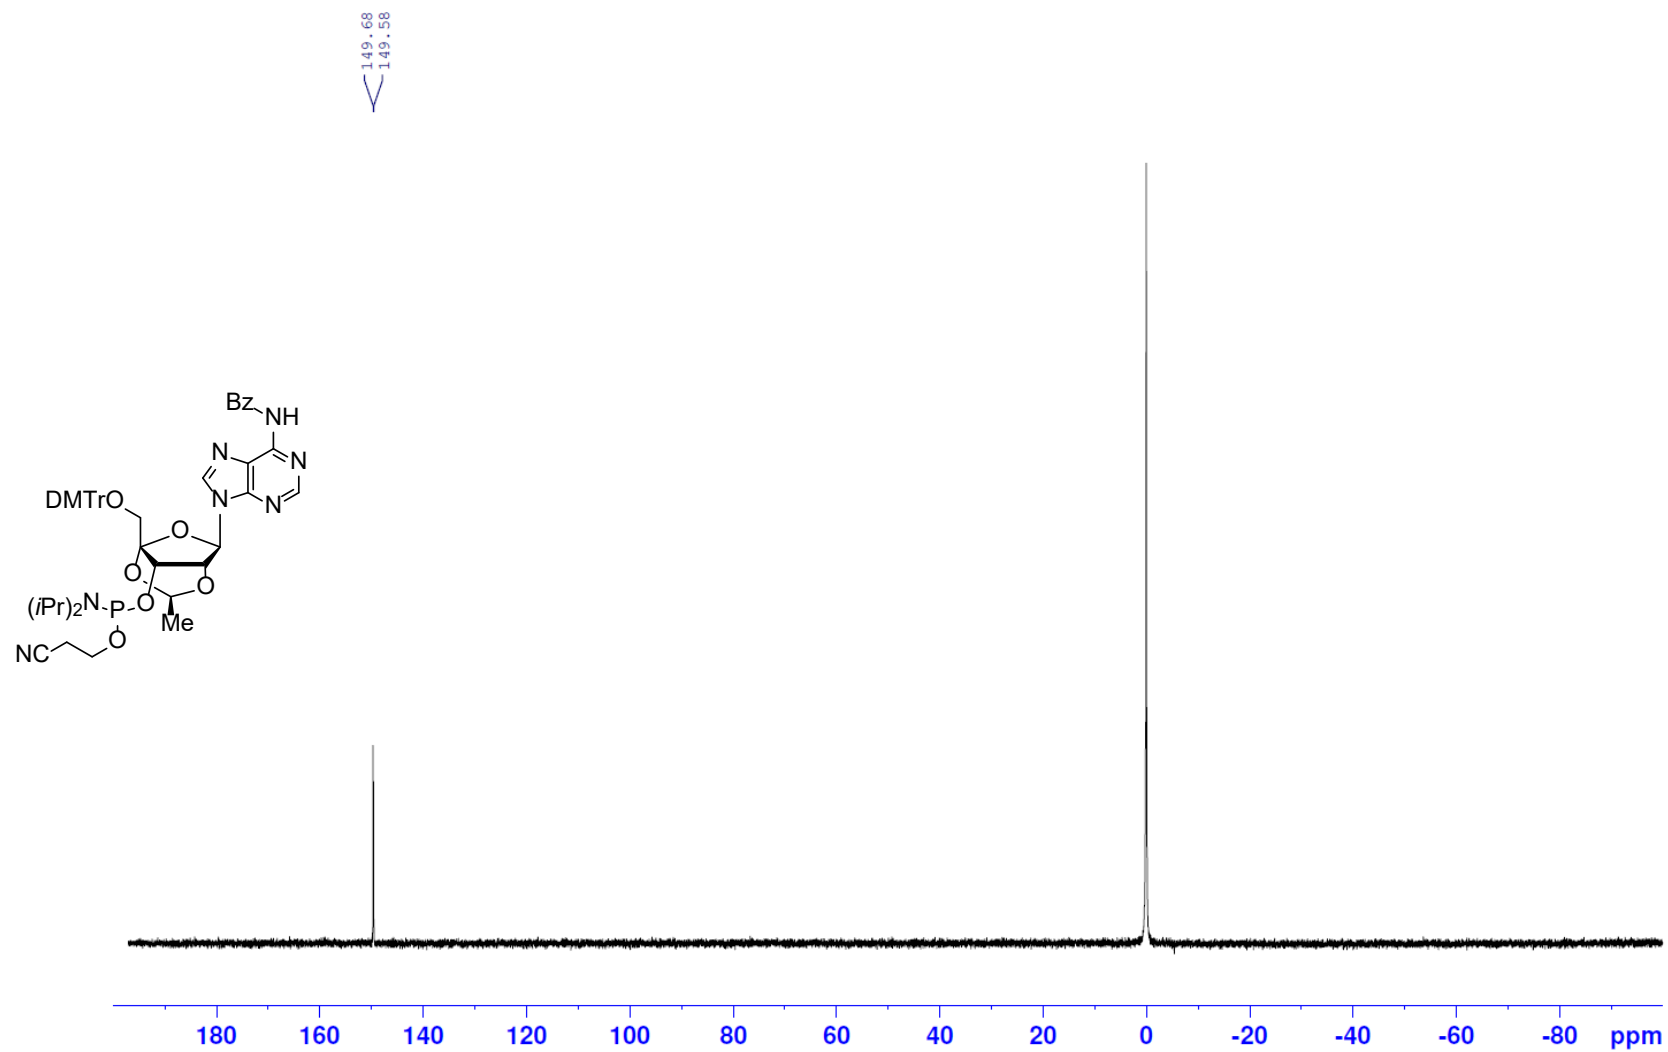



Compound **15** (500 MHz  $^1\text{H}$  NMR in  $\text{DMSO-}d_6$ )

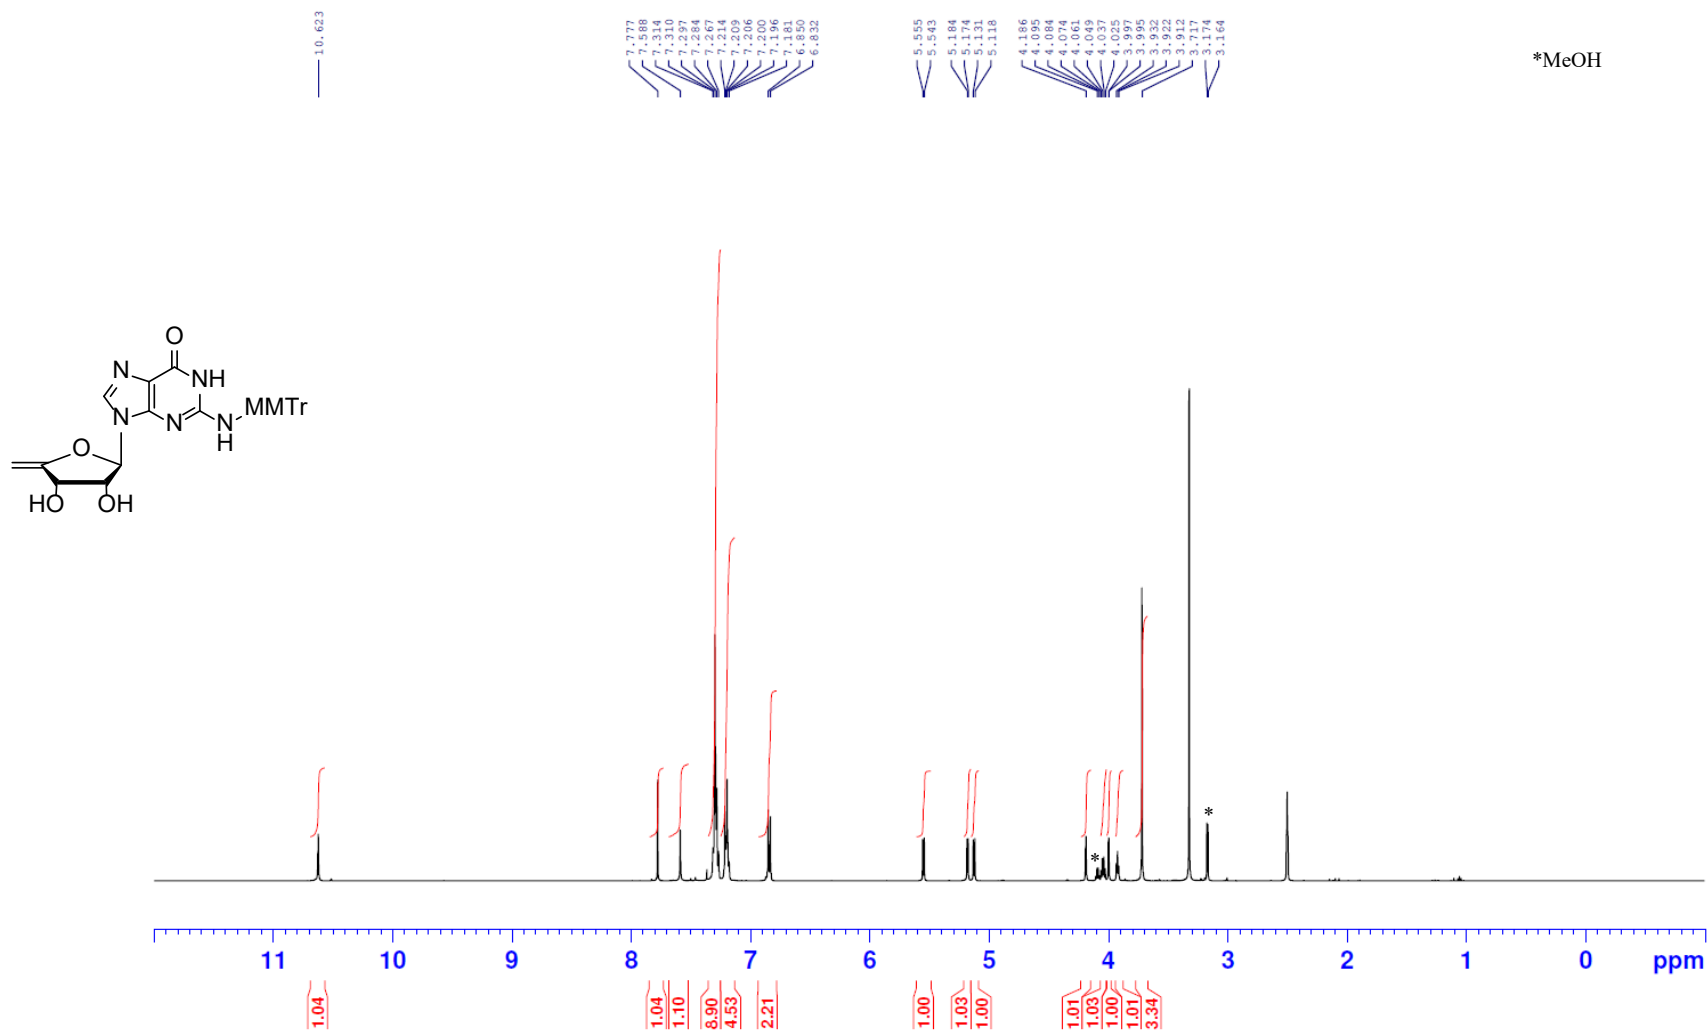

Compound **15** (125 MHz  $^{13}\text{C}$  NMR in  $\text{DMSO-}d_6$ )

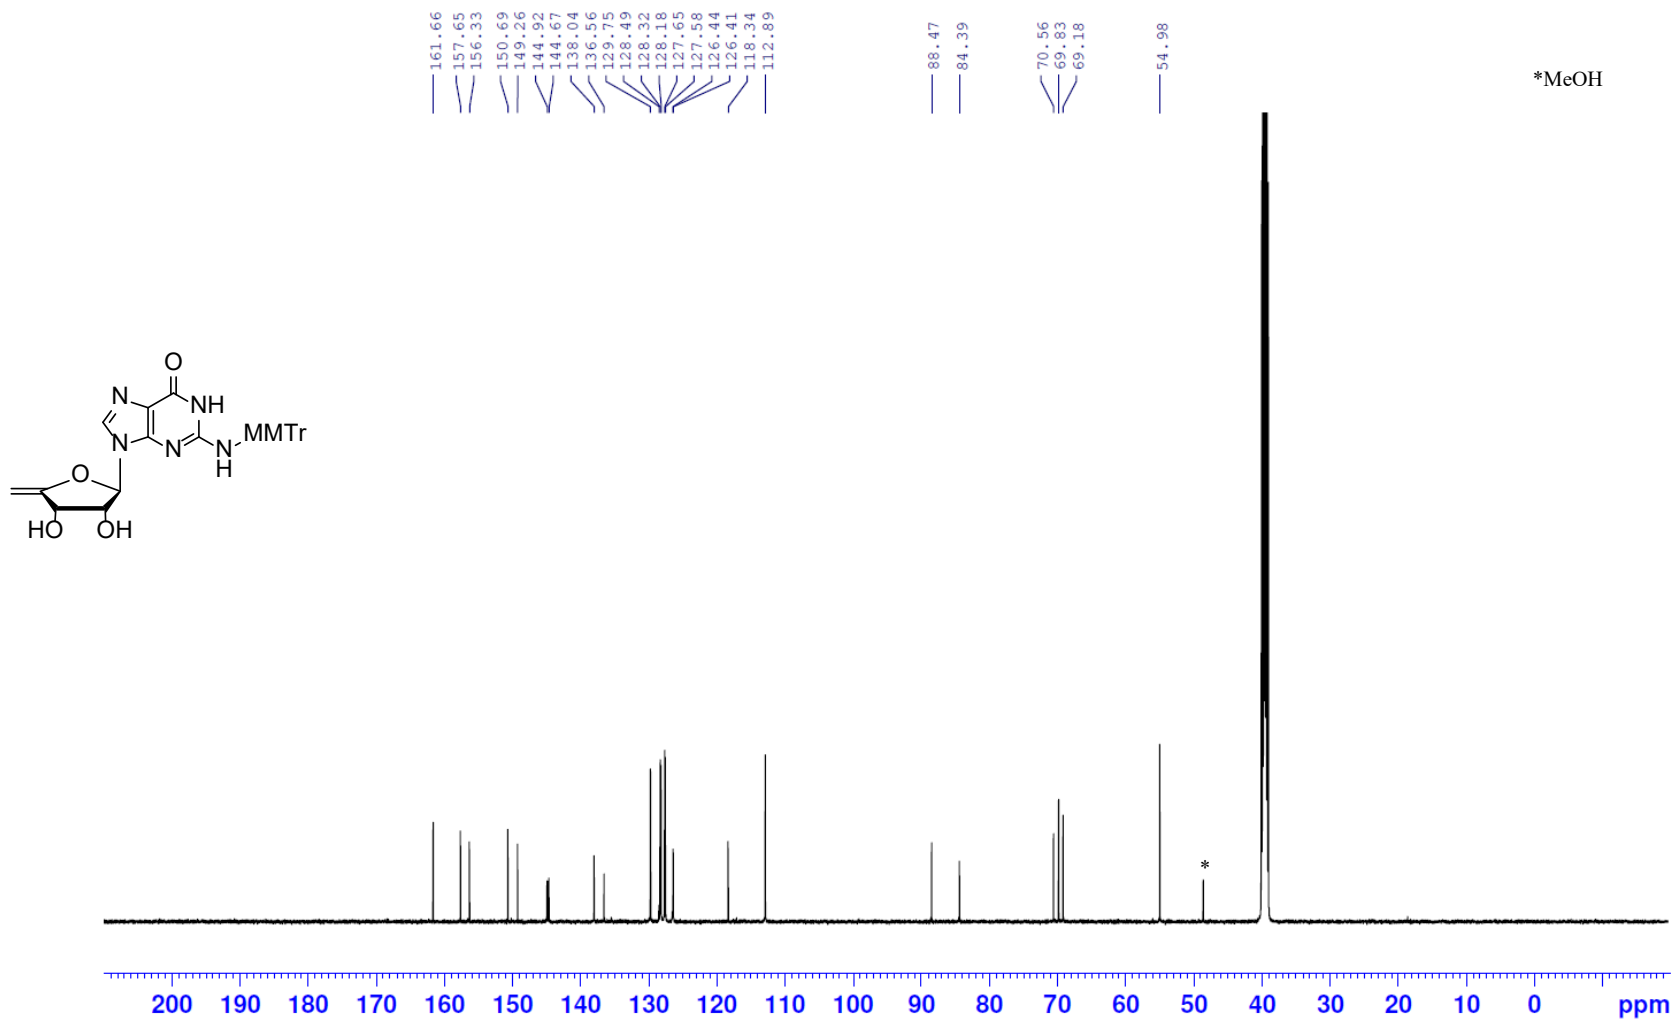

Compound **16** (500 MHz  $^1\text{H}$  NMR in  $\text{DMSO-}d_6$ )

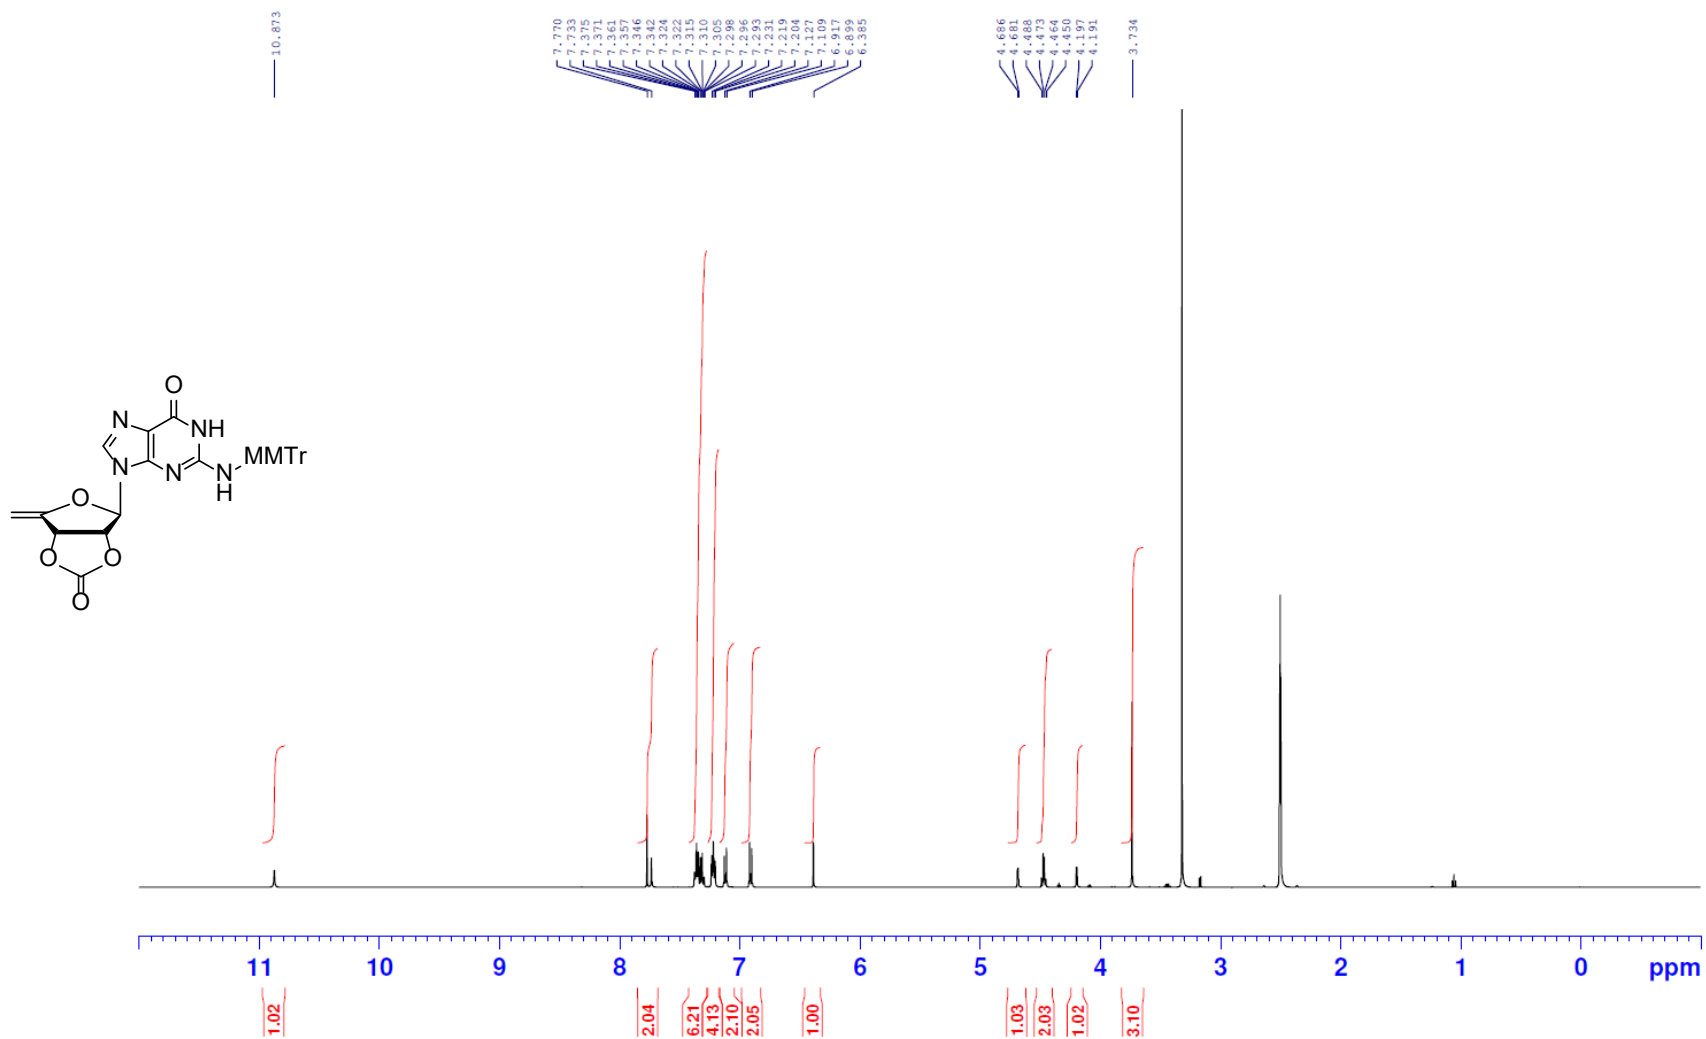

Compound **16** (125 MHz  $^{13}\text{C}$  NMR in  $\text{DMSO-}d_6$ )

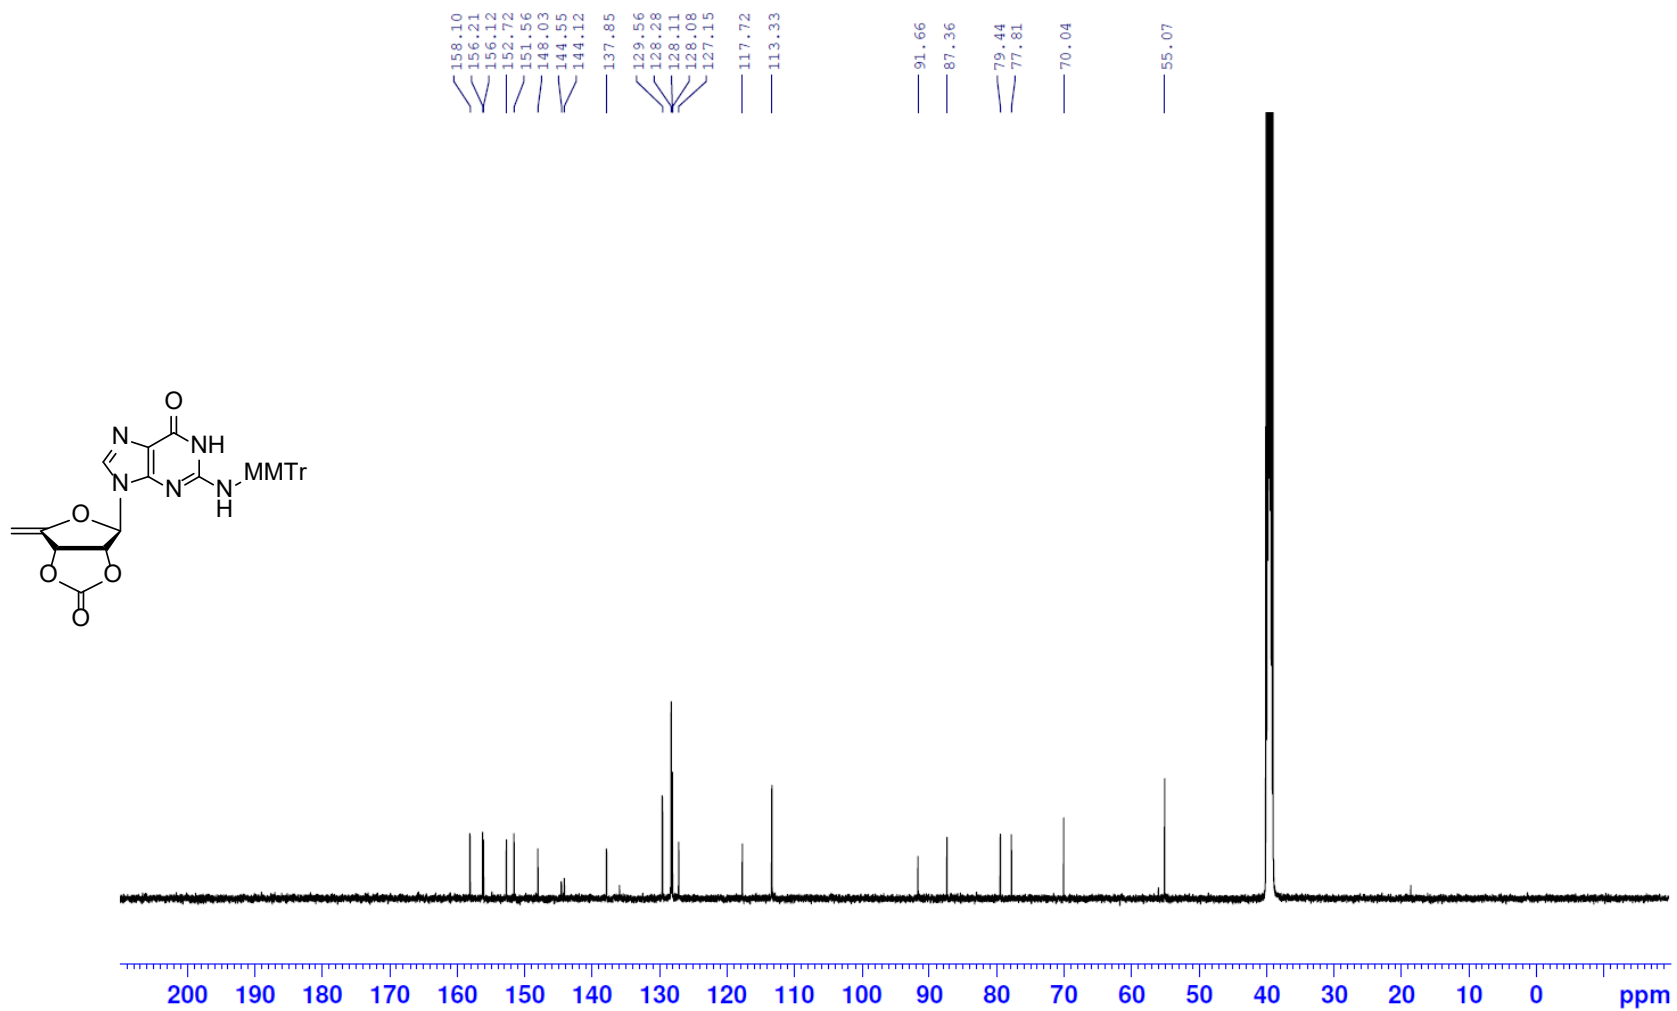

Compound 17 (500 MHz  $^1\text{H}$  NMR in  $\text{DMSO-}d_6$ )

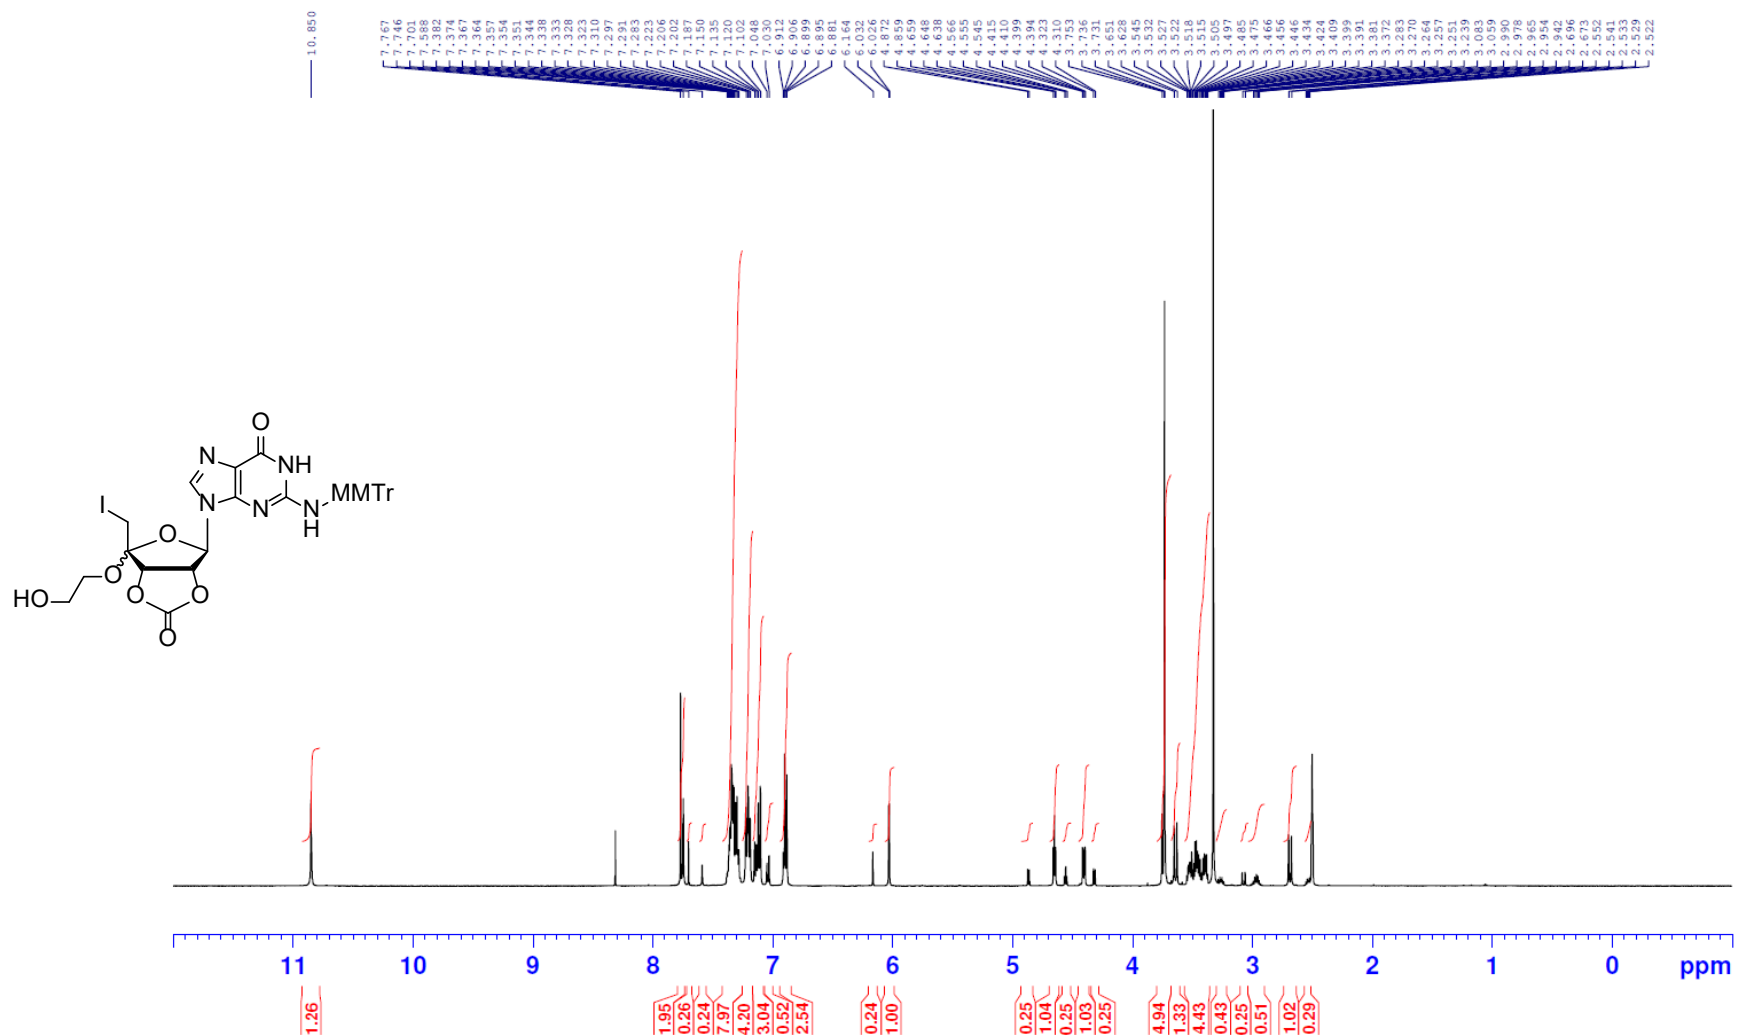

Compound 17 (125 MHz  $^{13}\text{C}$  NMR in  $\text{DMSO-}d_6$ )

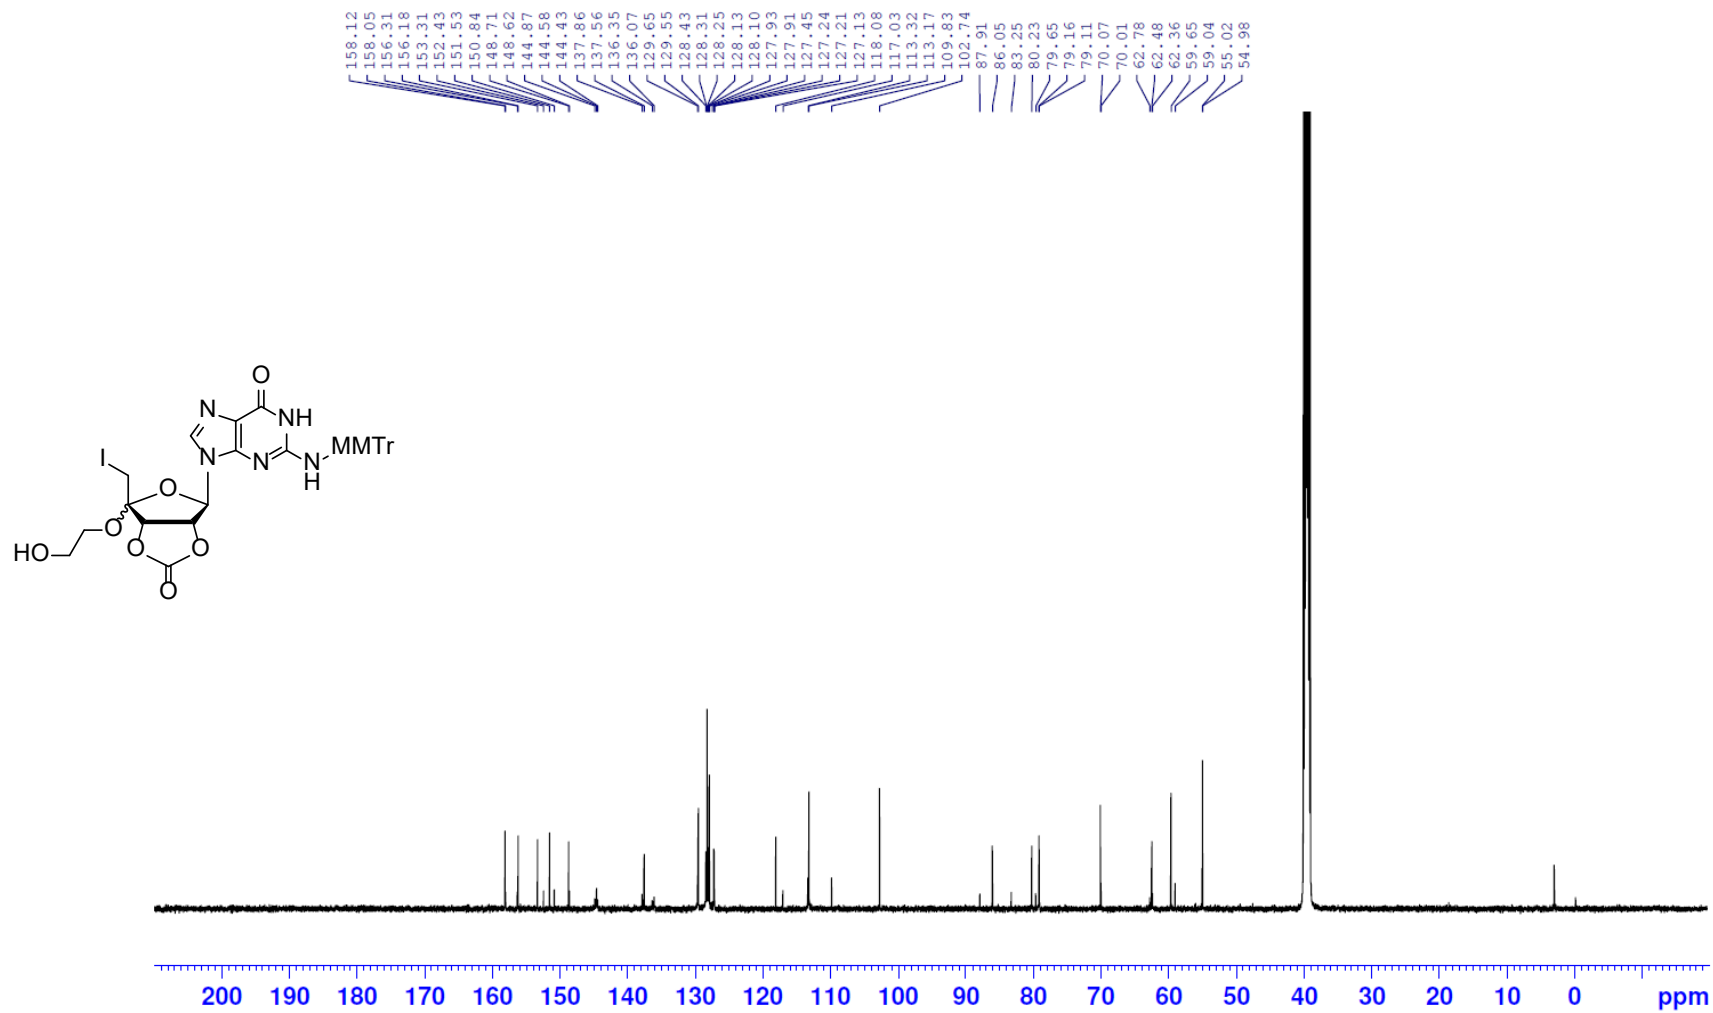

Compound **18** (500 MHz  $^1\text{H}$  NMR in  $\text{DMSO-}d_6$ )

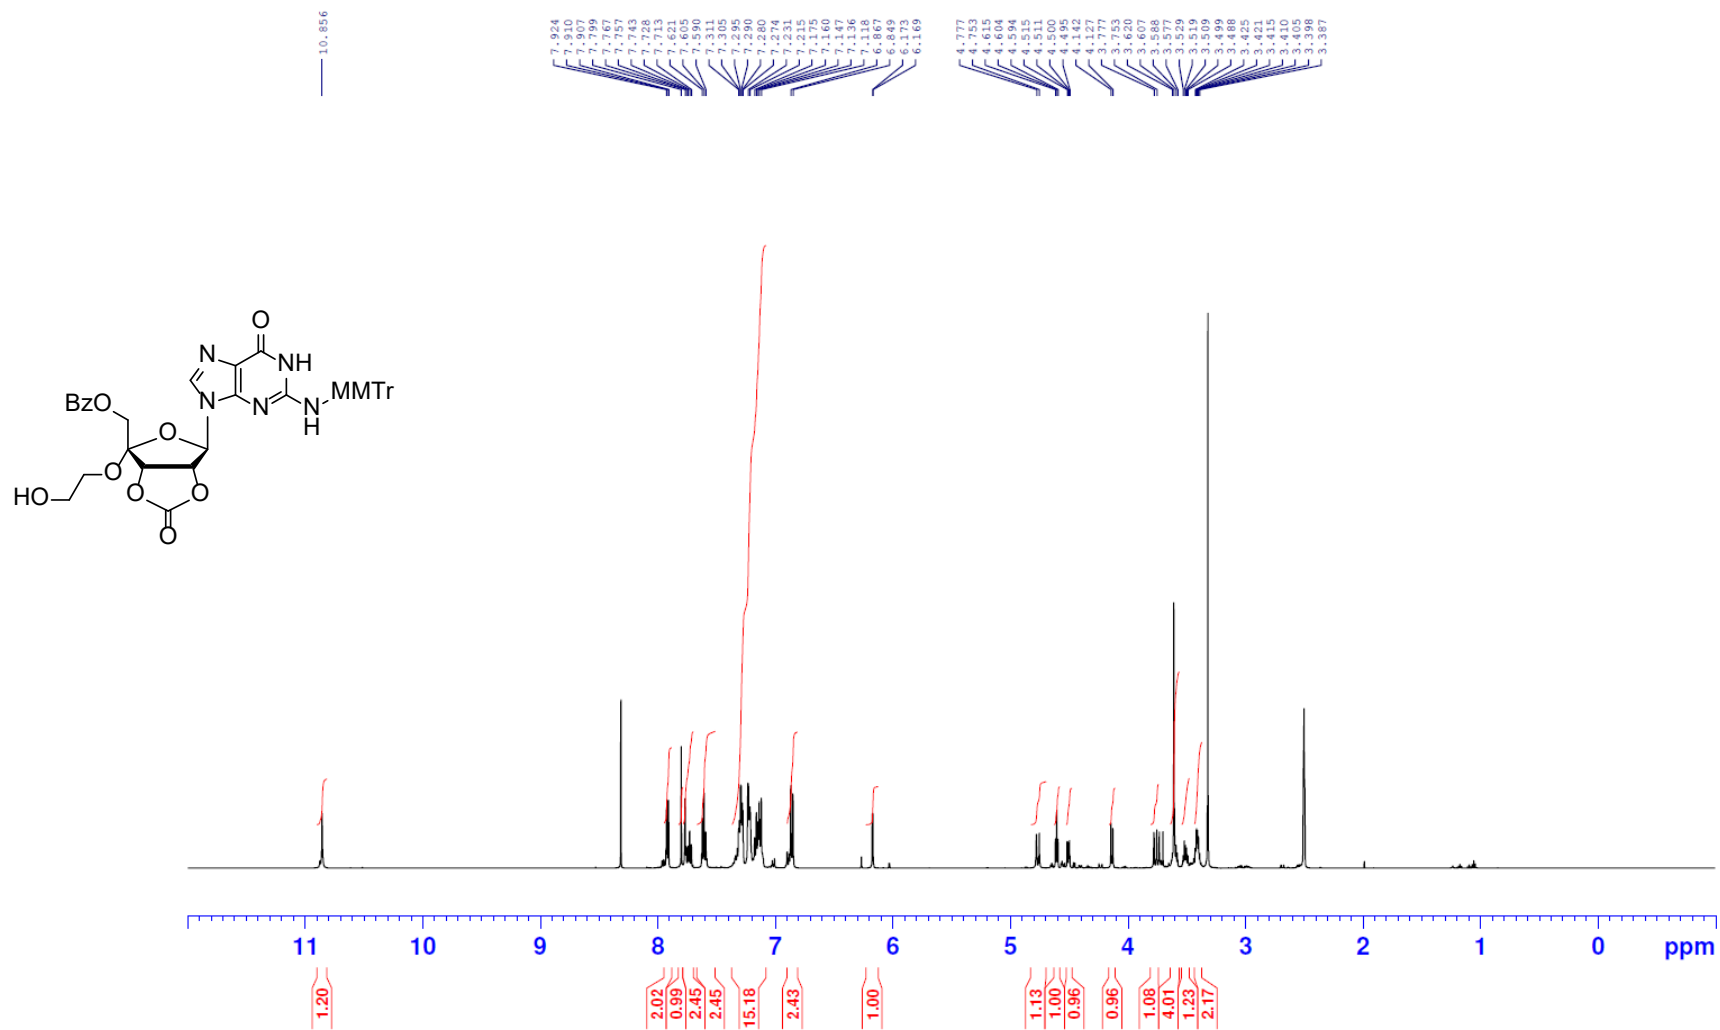

Compound **18** (125 MHz  $^{13}\text{C}$  NMR in  $\text{DMSO-}d_6$ )

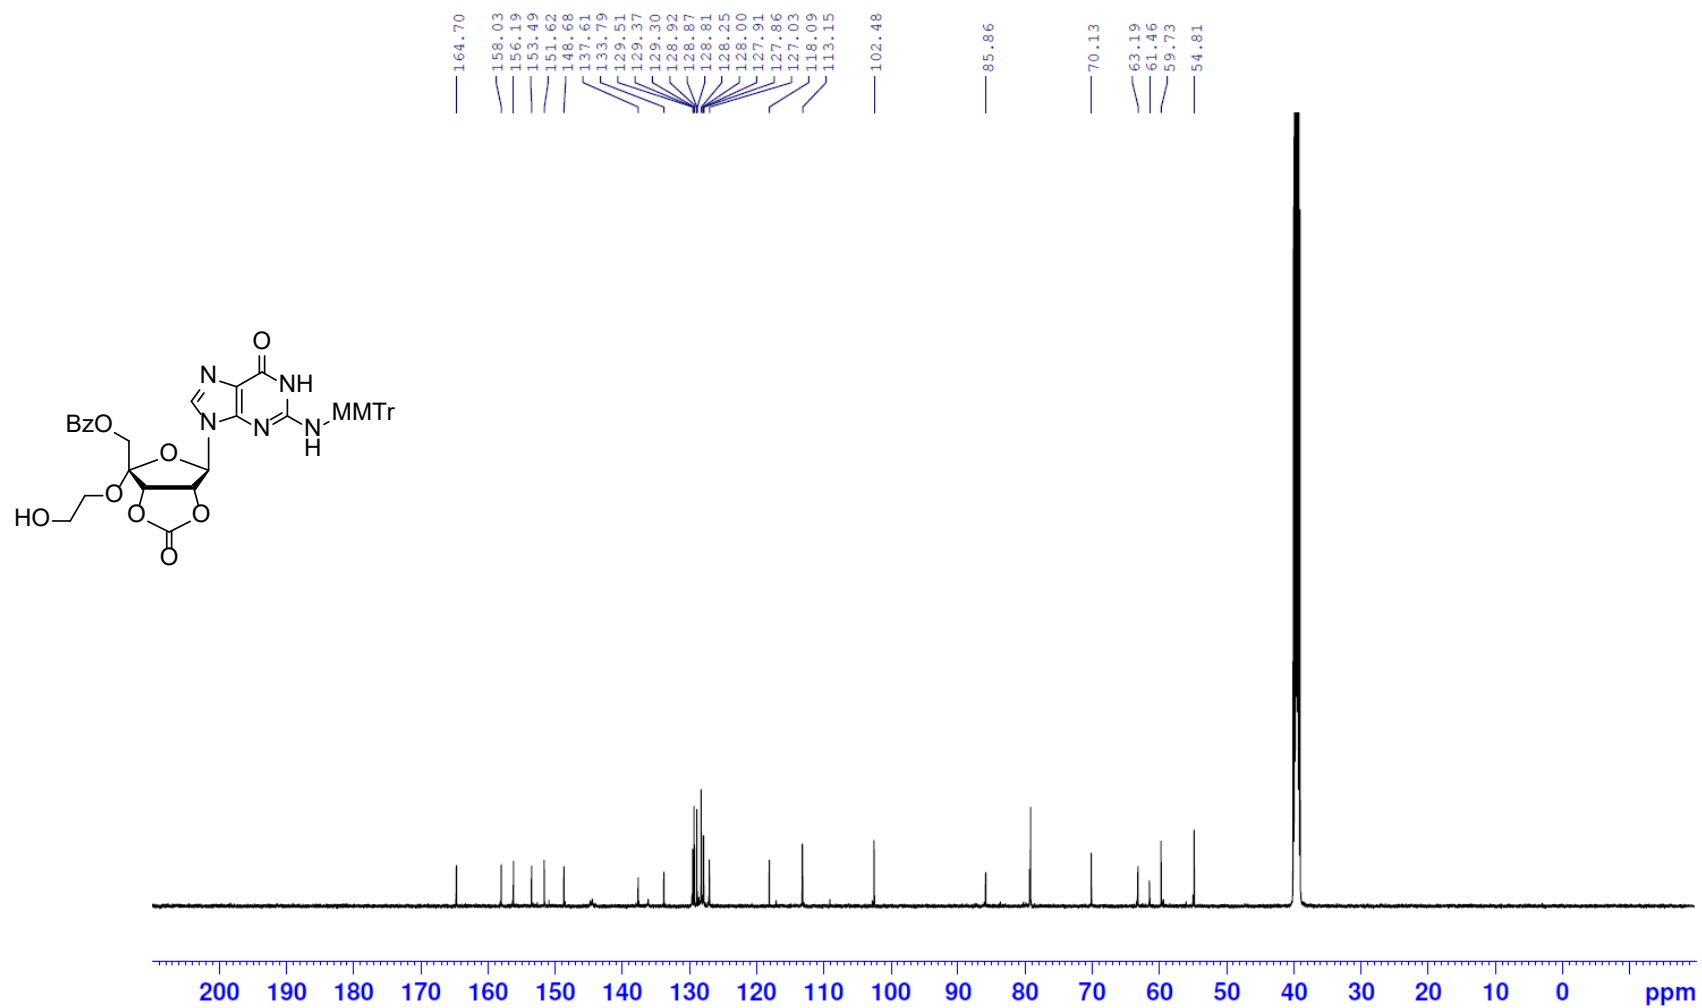



Compound **19** (500 MHz  $^1\text{H}$  NMR in  $\text{CDCl}_3$ )

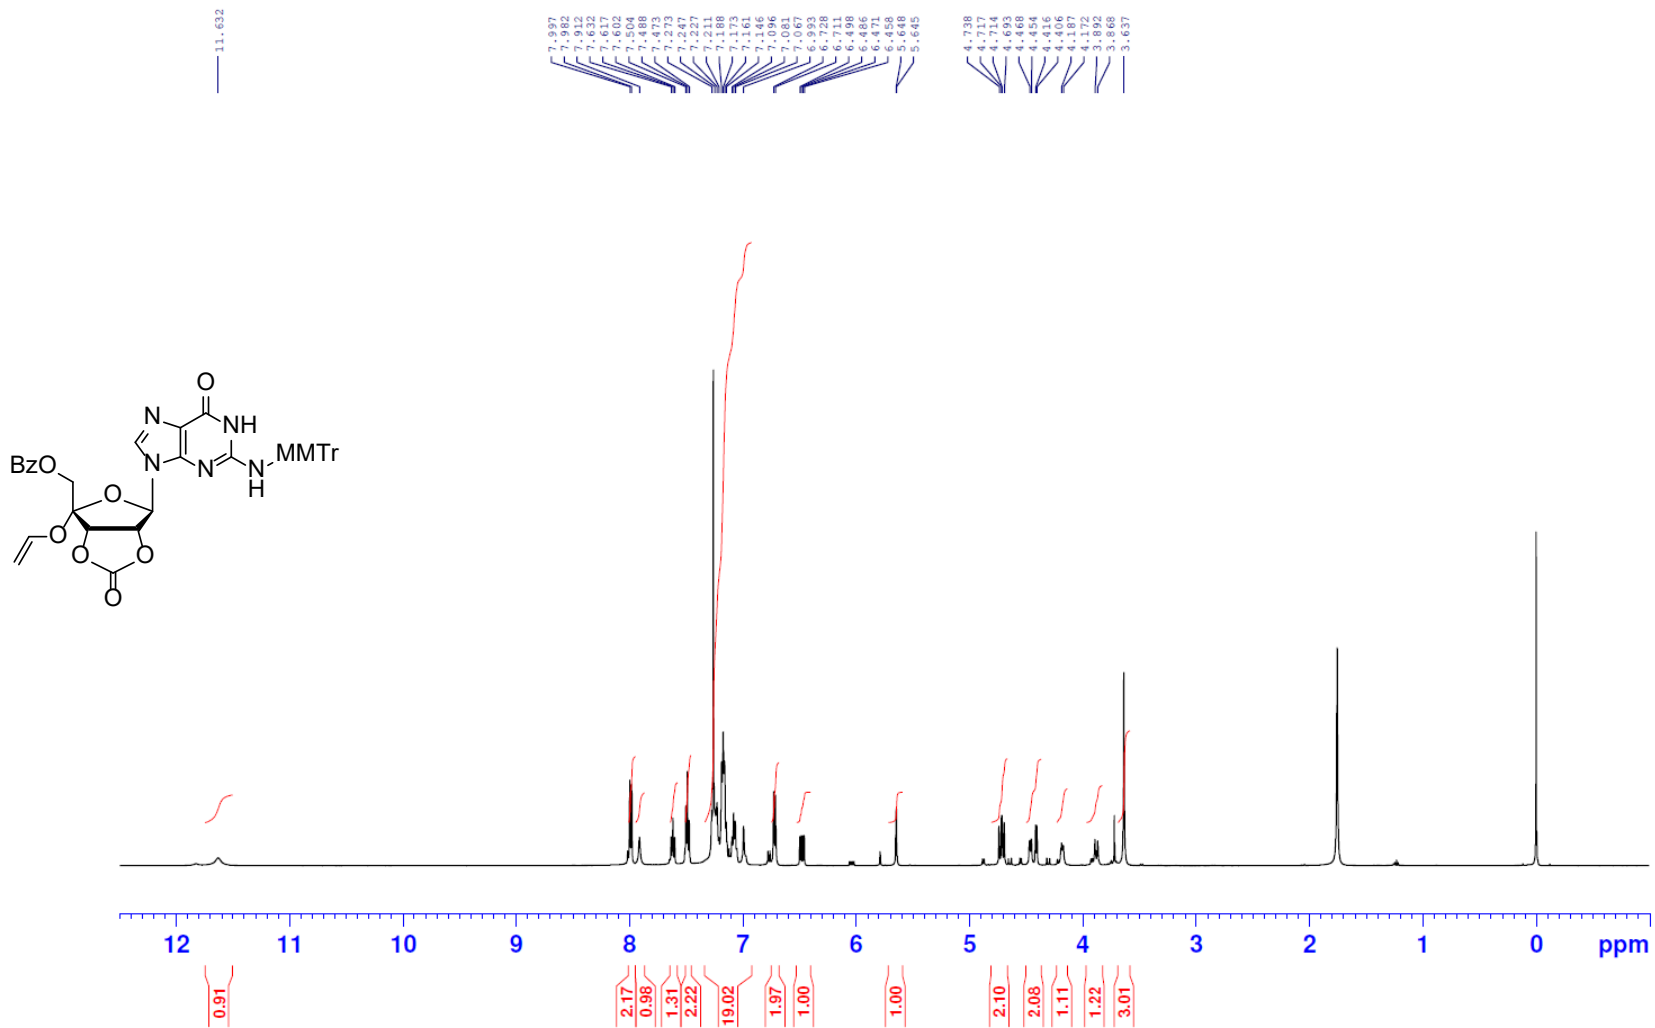

Compound **19** (125 MHz  $^{13}\text{C}$  NMR in  $\text{CDCl}_3$ )

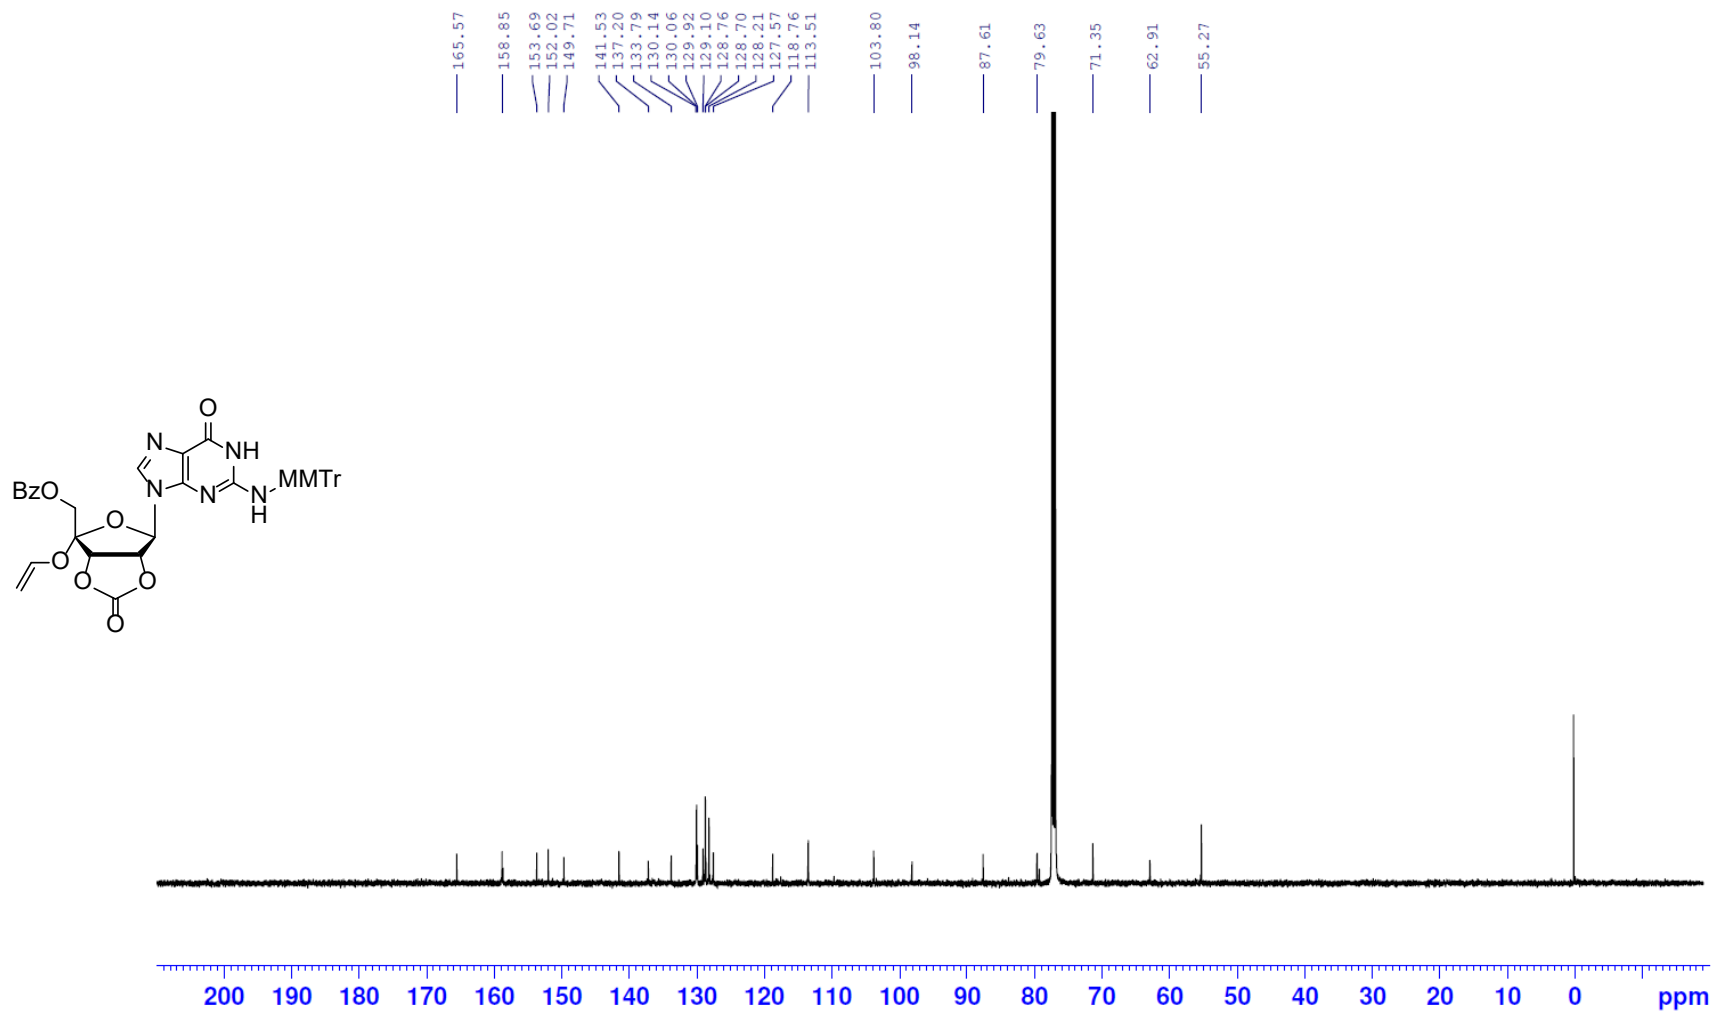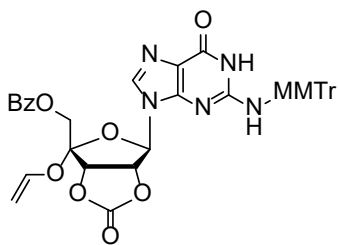

Compound **20** (500 MHz  $^1\text{H}$  NMR in  $\text{CDCl}_3$ )

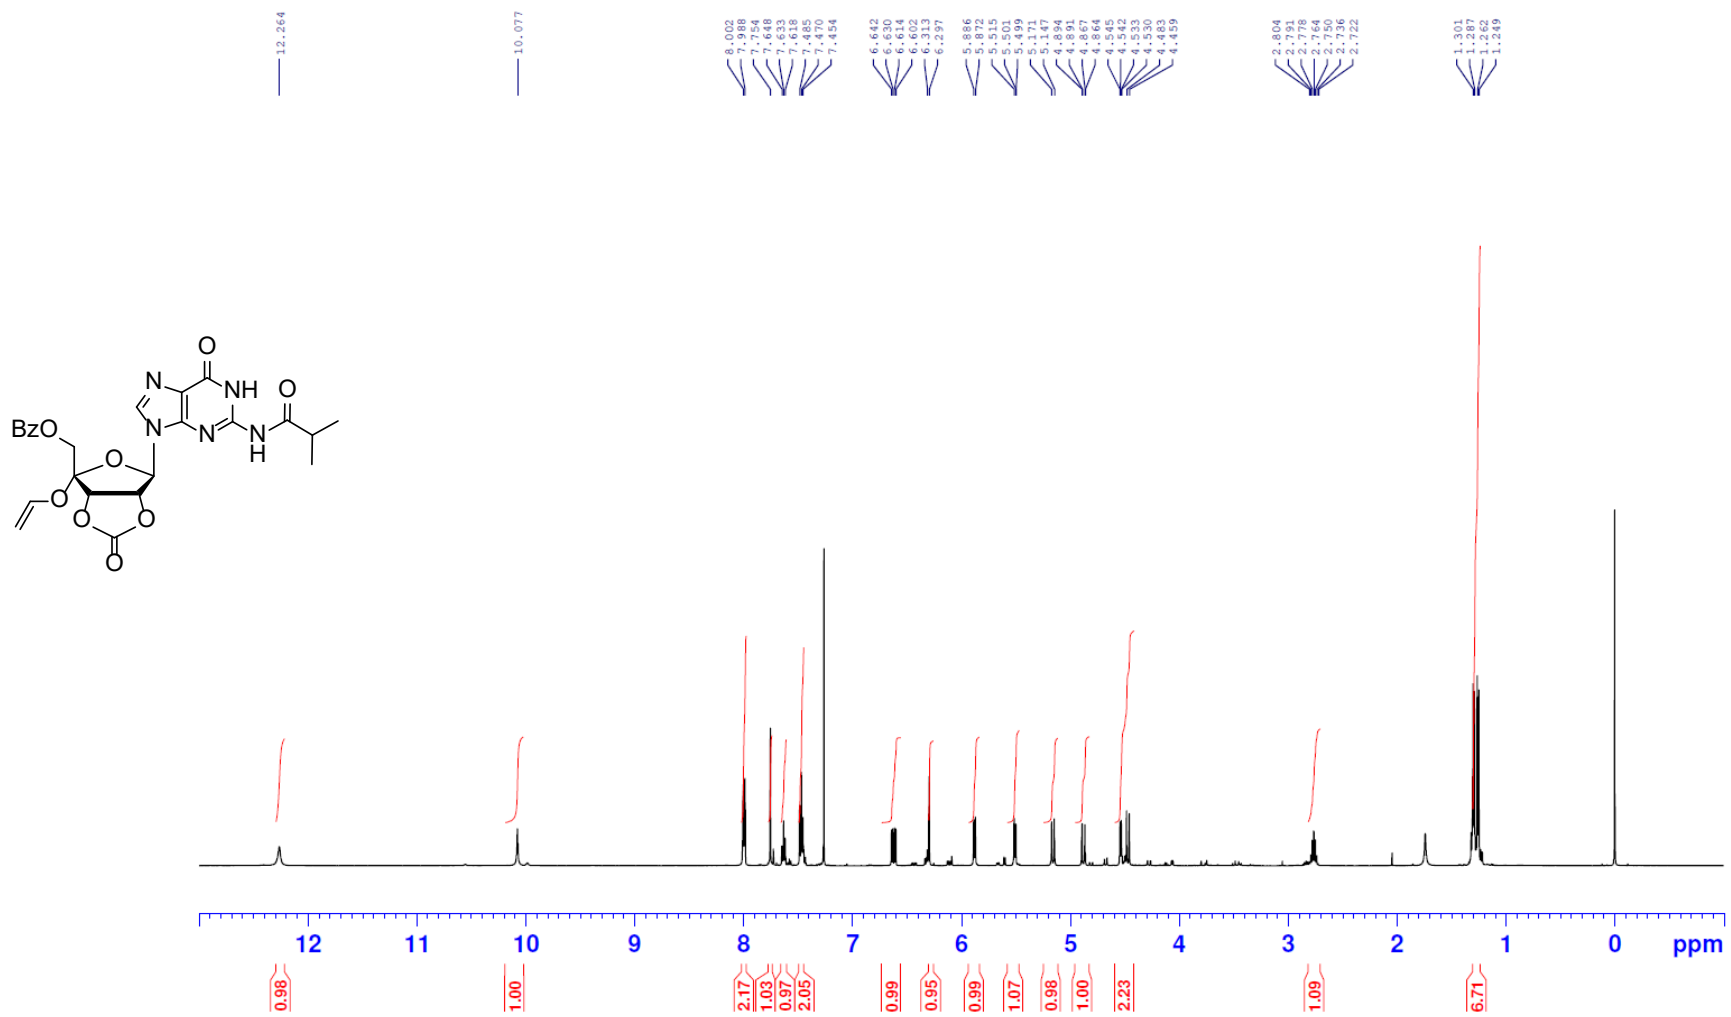

Compound **20** (125 MHz  $^{13}\text{C}$  NMR in  $\text{CDCl}_3$ )

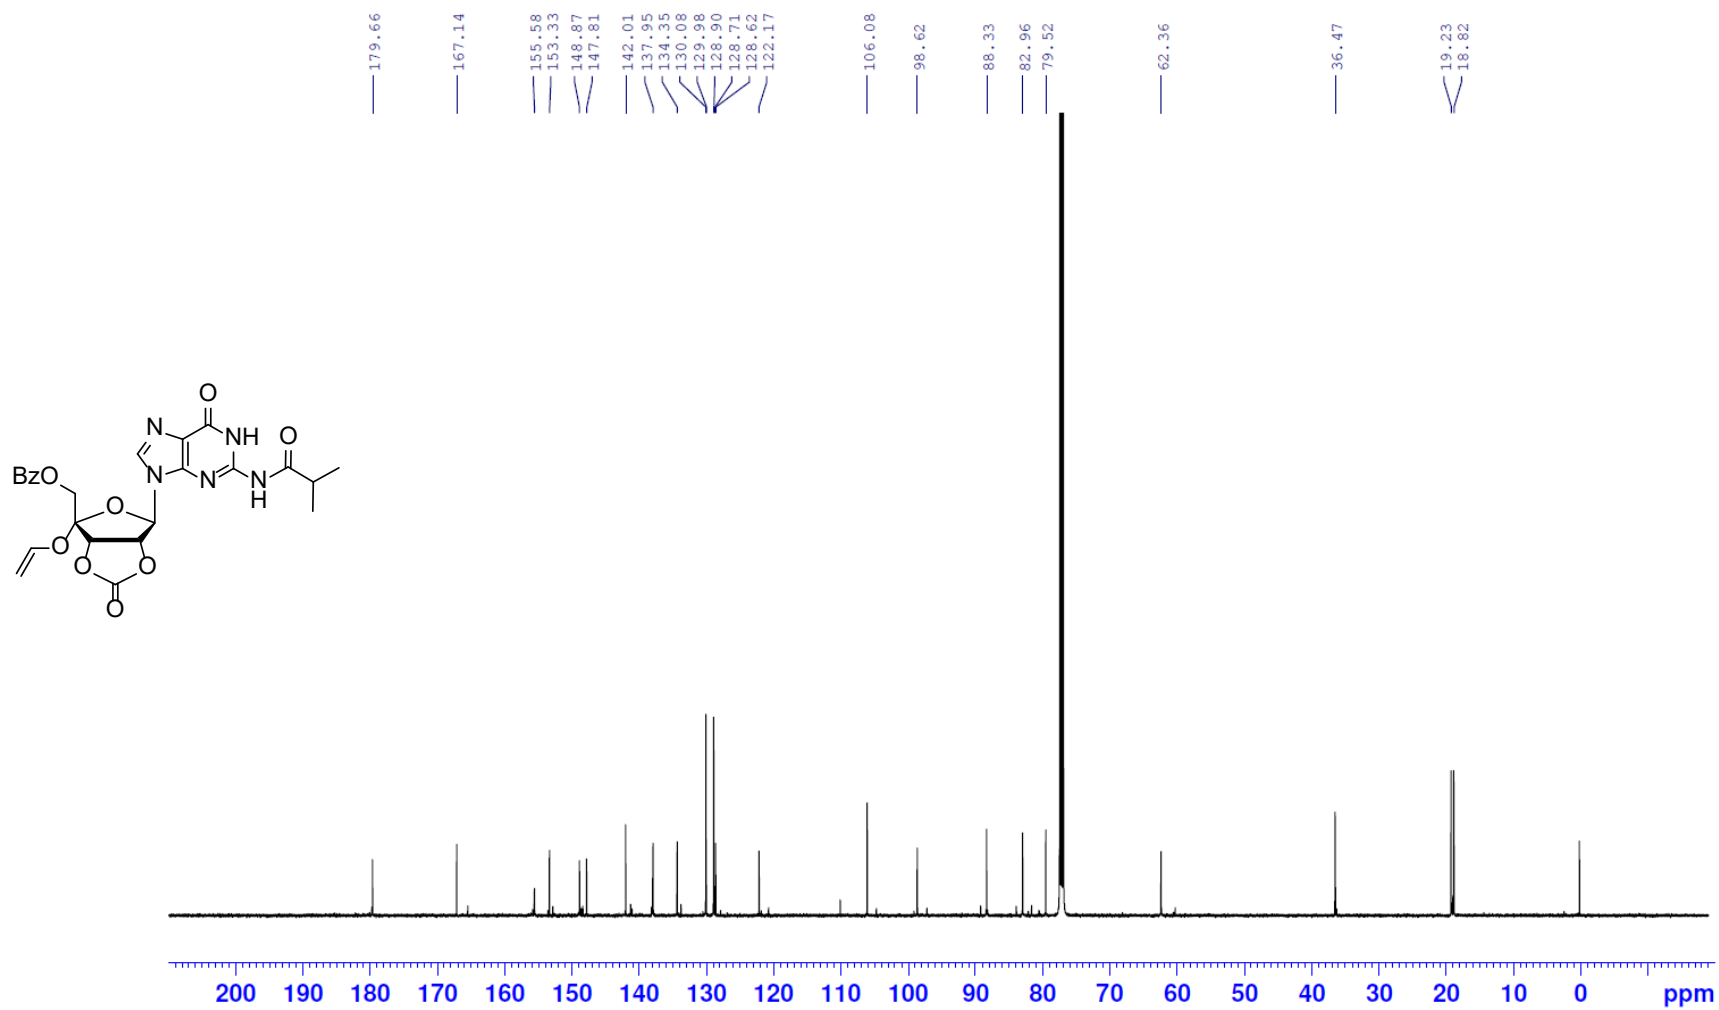

Compound **21** (500 MHz  $^1\text{H}$  NMR in  $\text{CD}_3\text{OD}$ )

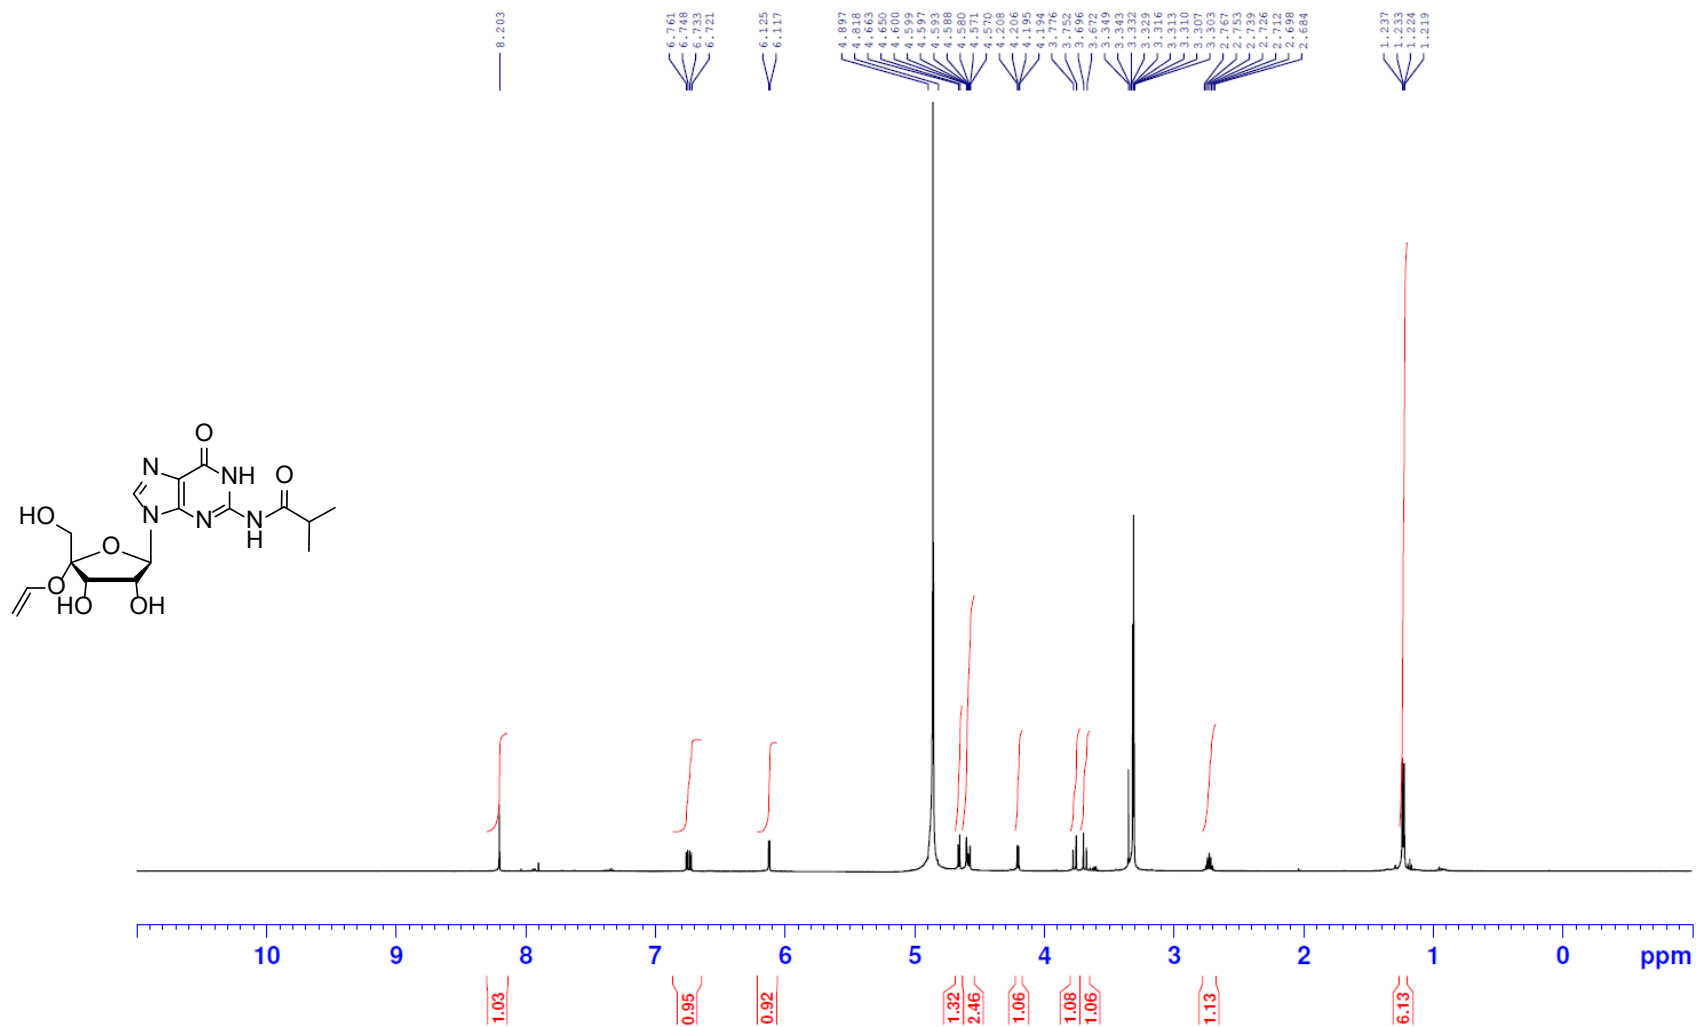

Compound **21** (125 MHz  $^{13}\text{C}$  NMR in  $\text{CD}_3\text{OD}$ )

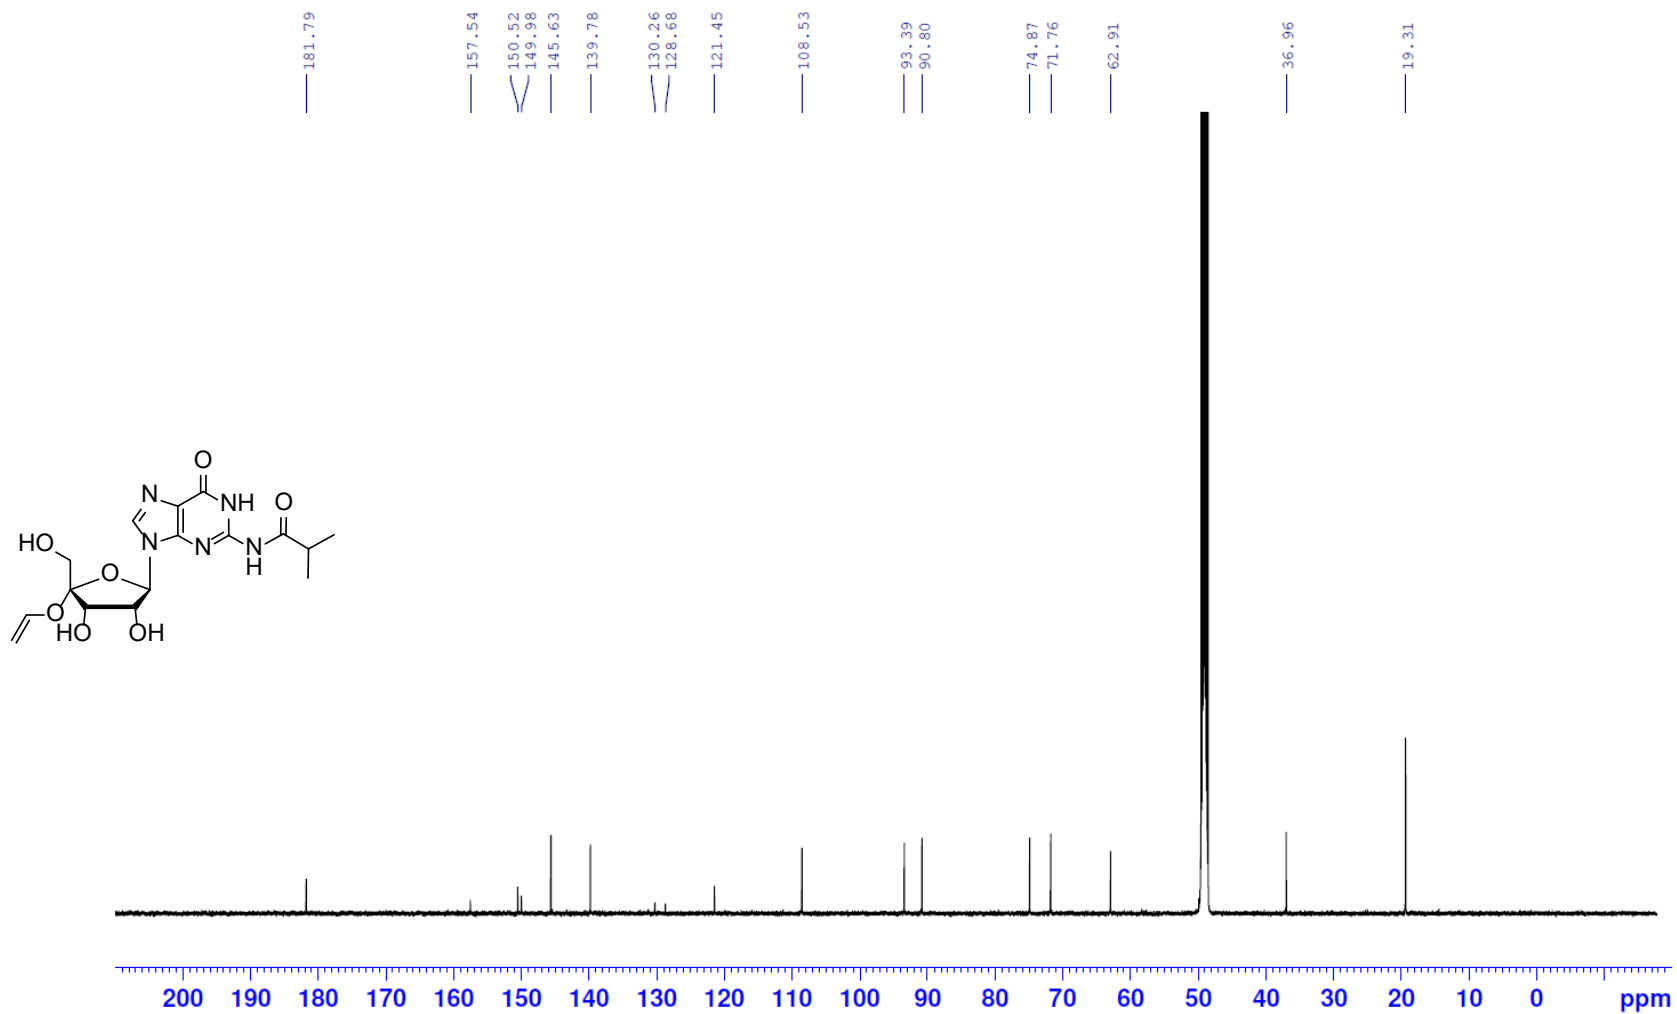

Compound 22 (500 MHz <sup>1</sup>H NMR in CD<sub>3</sub>OD)

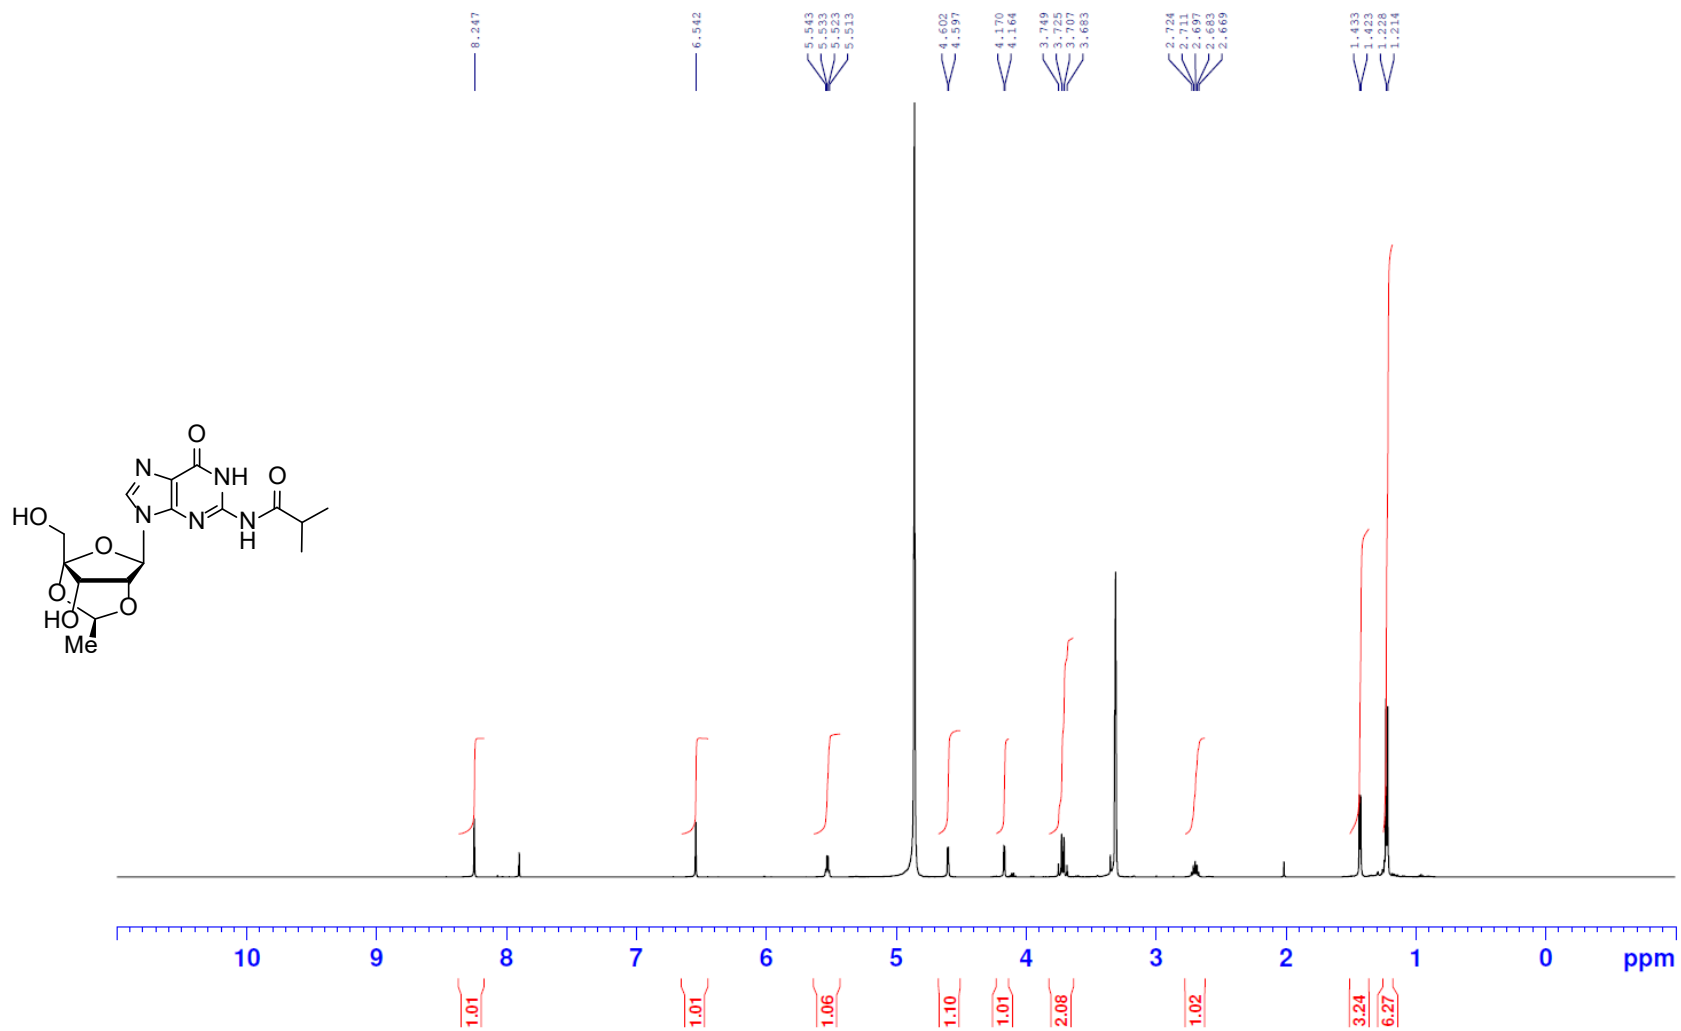

Compound **22** (125 MHz  $^{13}\text{C}$  NMR in  $\text{CD}_3\text{OD}$ )

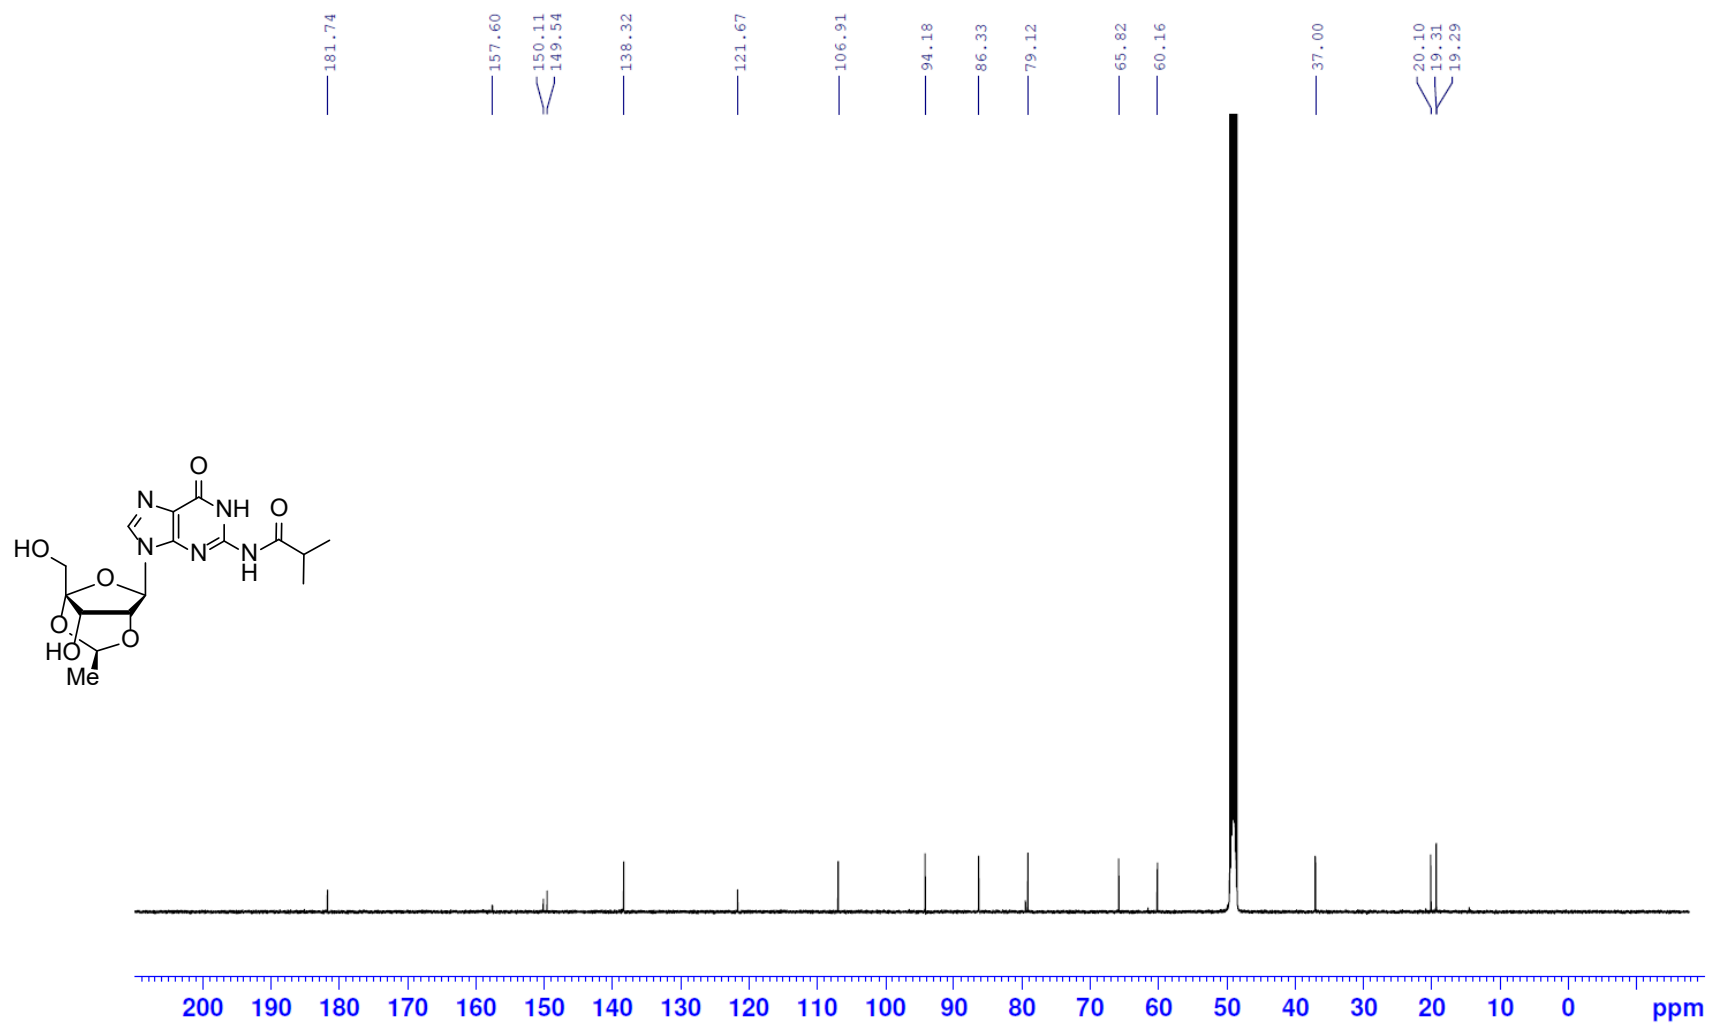



5'-O-DMTr-intermediate of guanosine compound (500 MHz <sup>1</sup>H NMR in CDCl<sub>3</sub>)

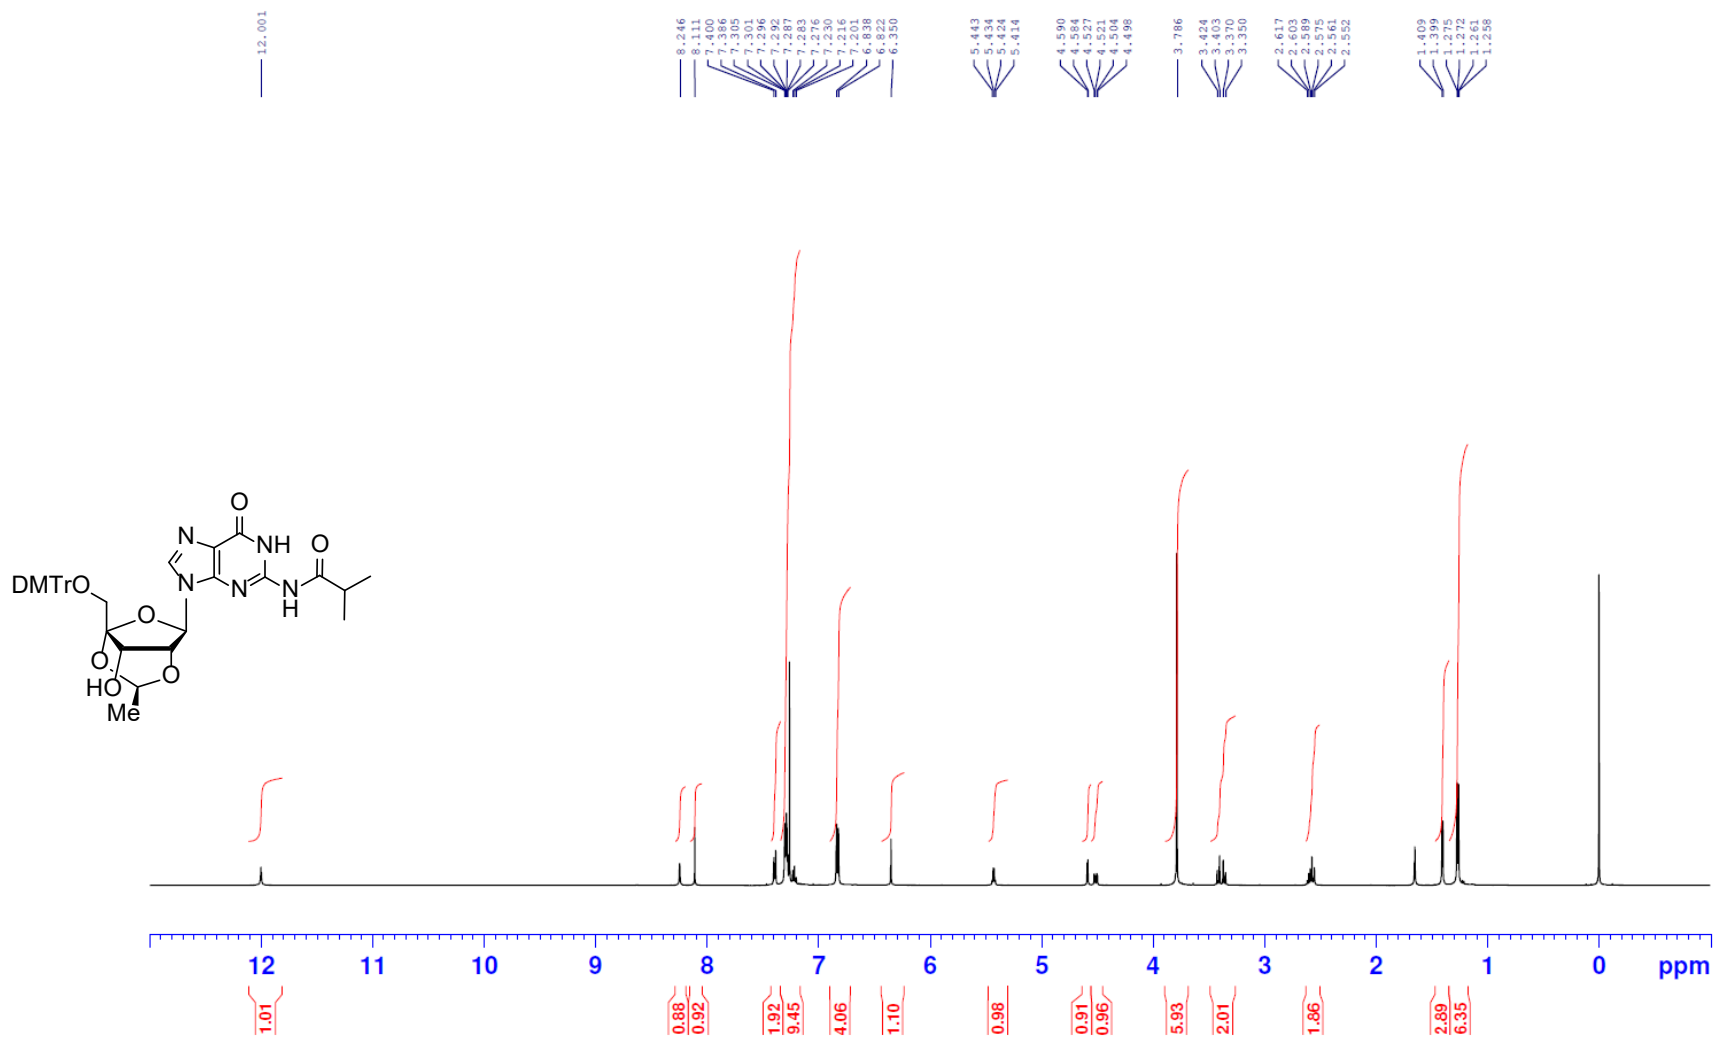

5'-O-DMTr-intermediate of guanosine compound (125 MHz  $^{13}\text{C}$  NMR in  $\text{CDCl}_3$ )

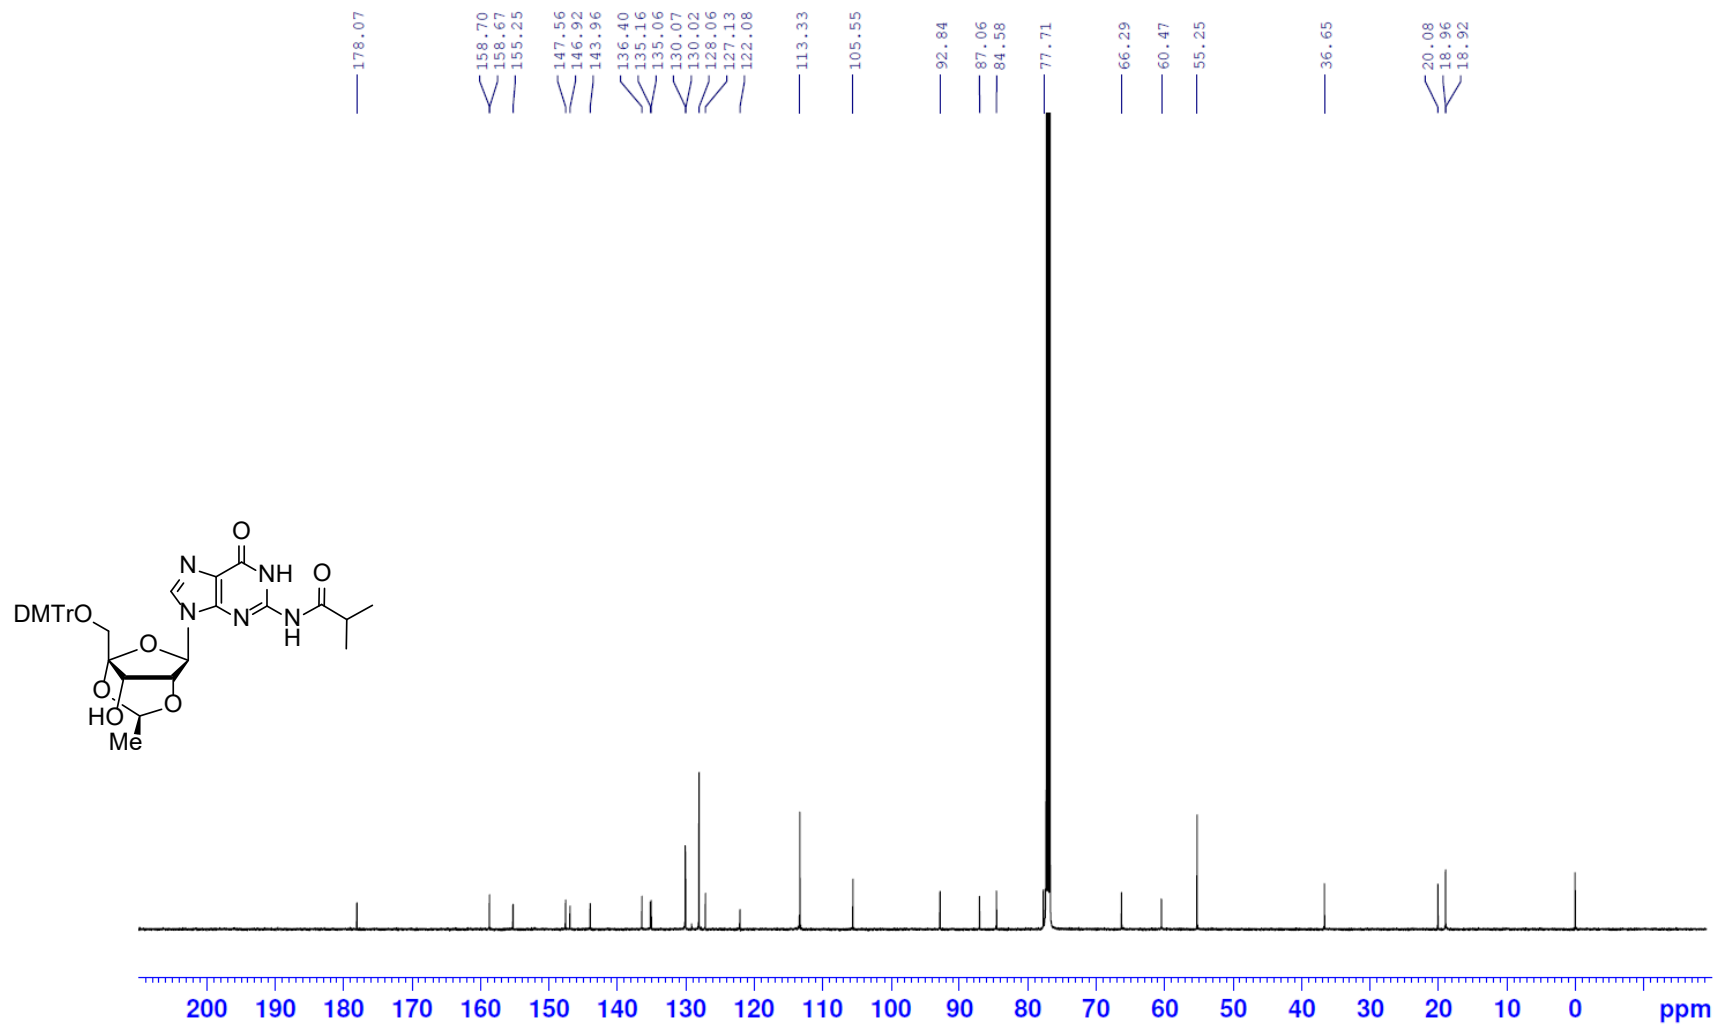

Compound 23 (500 MHz <sup>1</sup>H NMR in CDCl<sub>3</sub>)

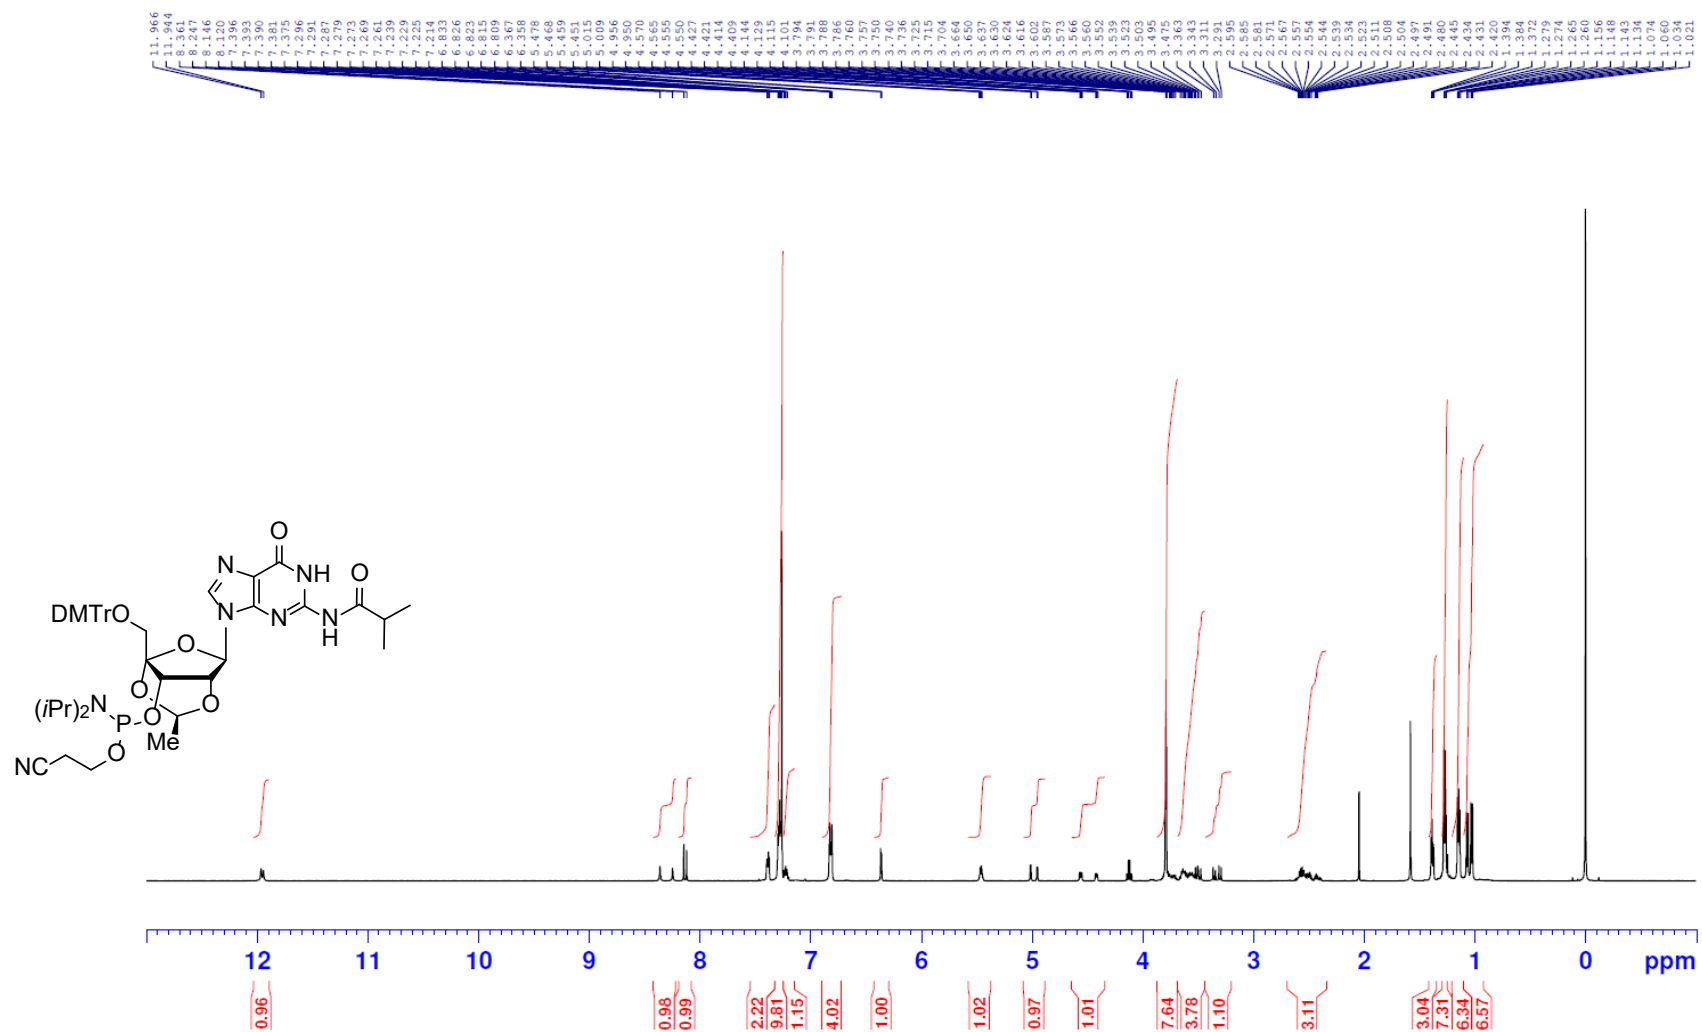

Compound **23** (202 MHz  $^{31}\text{P}$  NMR in  $\text{CDCl}_3$ )

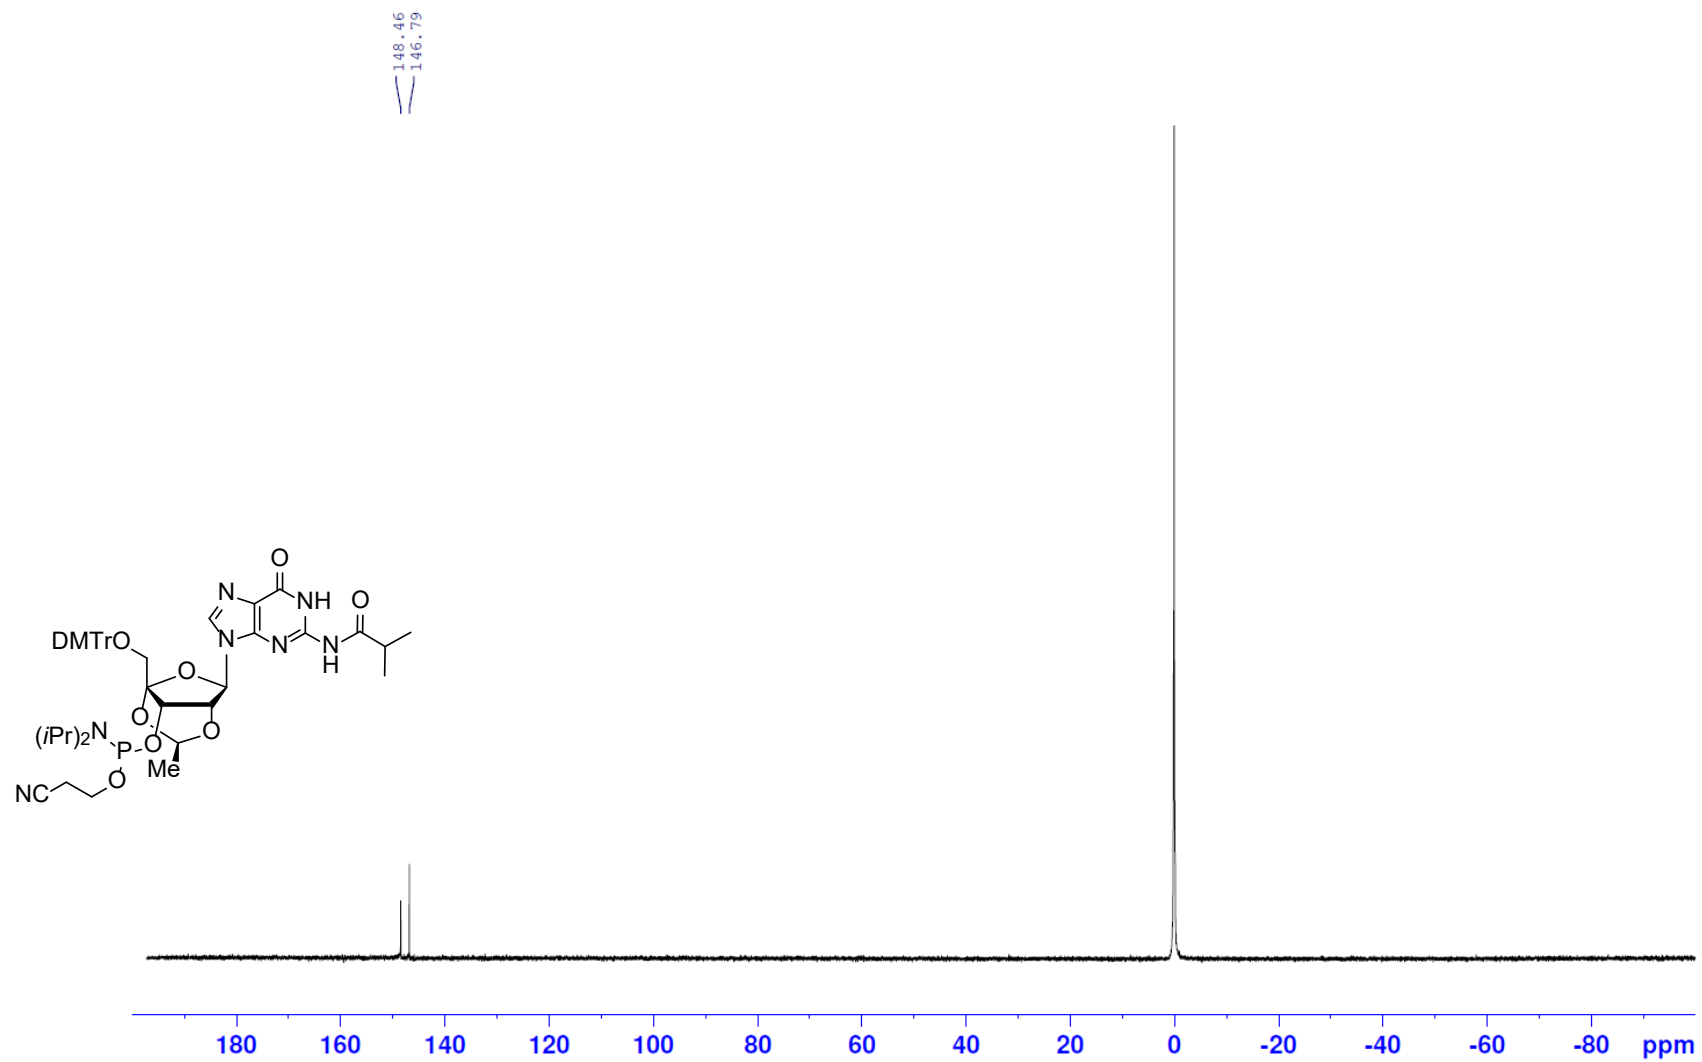

Compound S1 (500 MHz <sup>1</sup>H NMR in CD<sub>3</sub>OD)

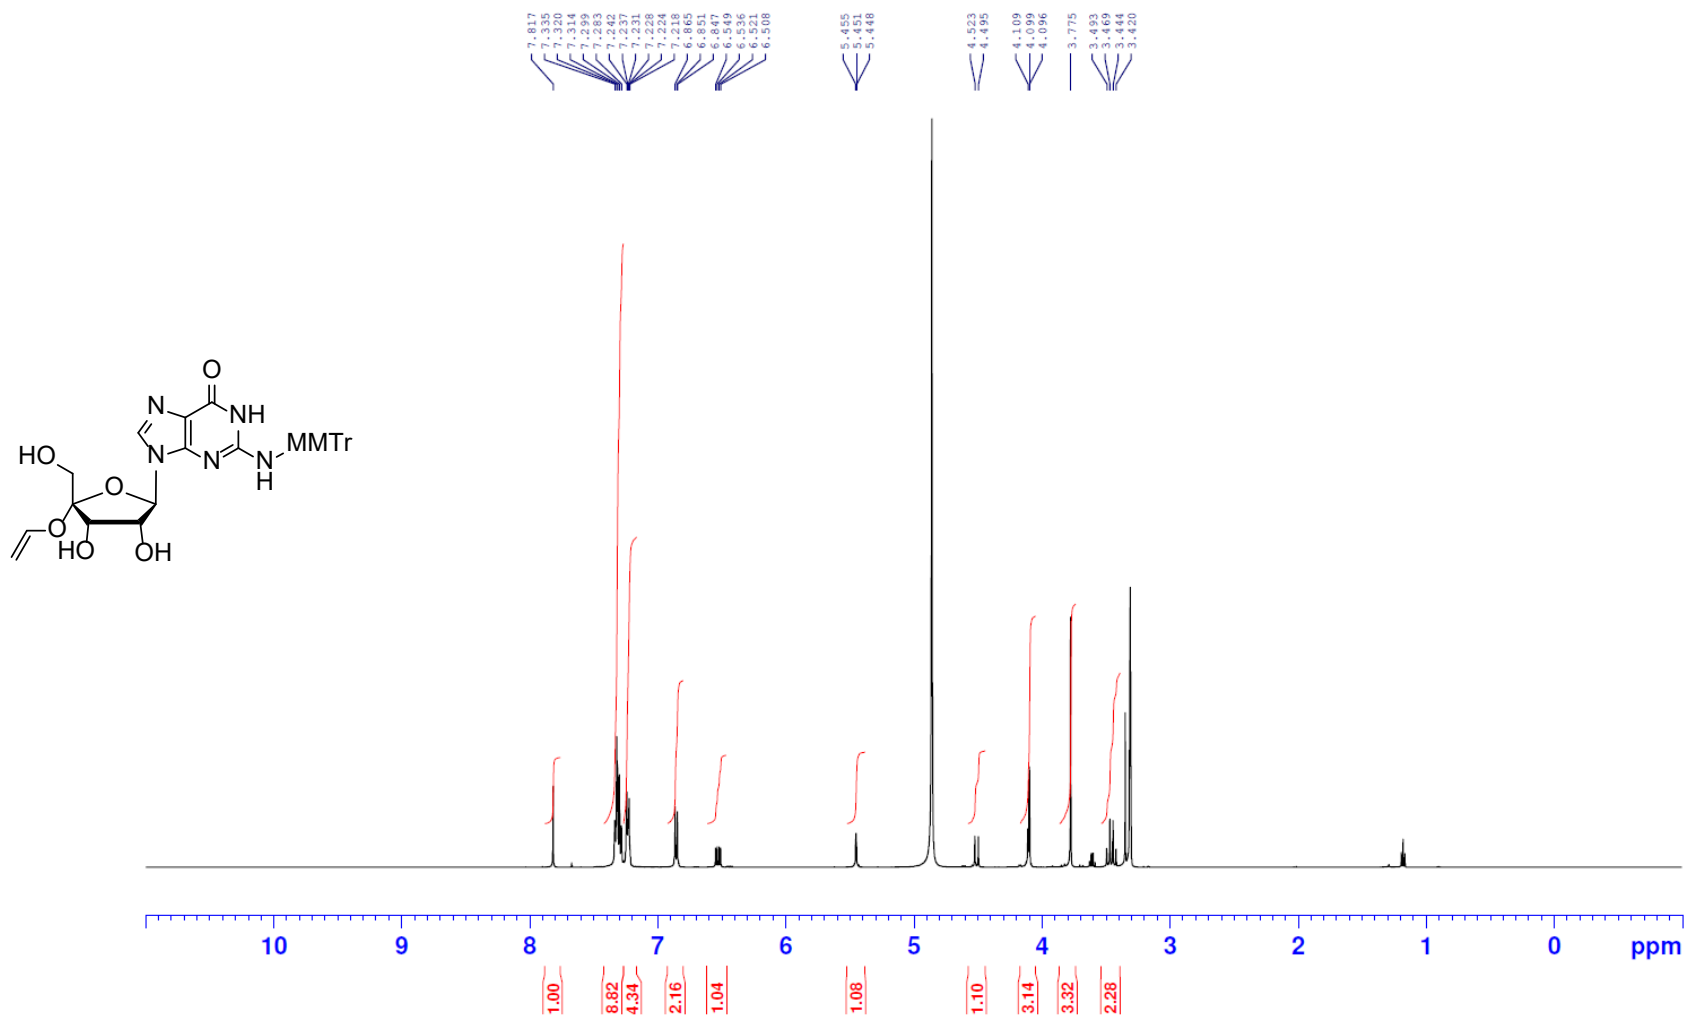

Compound **S1** (125 MHz  $^{13}\text{C}$  NMR in  $\text{CD}_3\text{OD}$ )

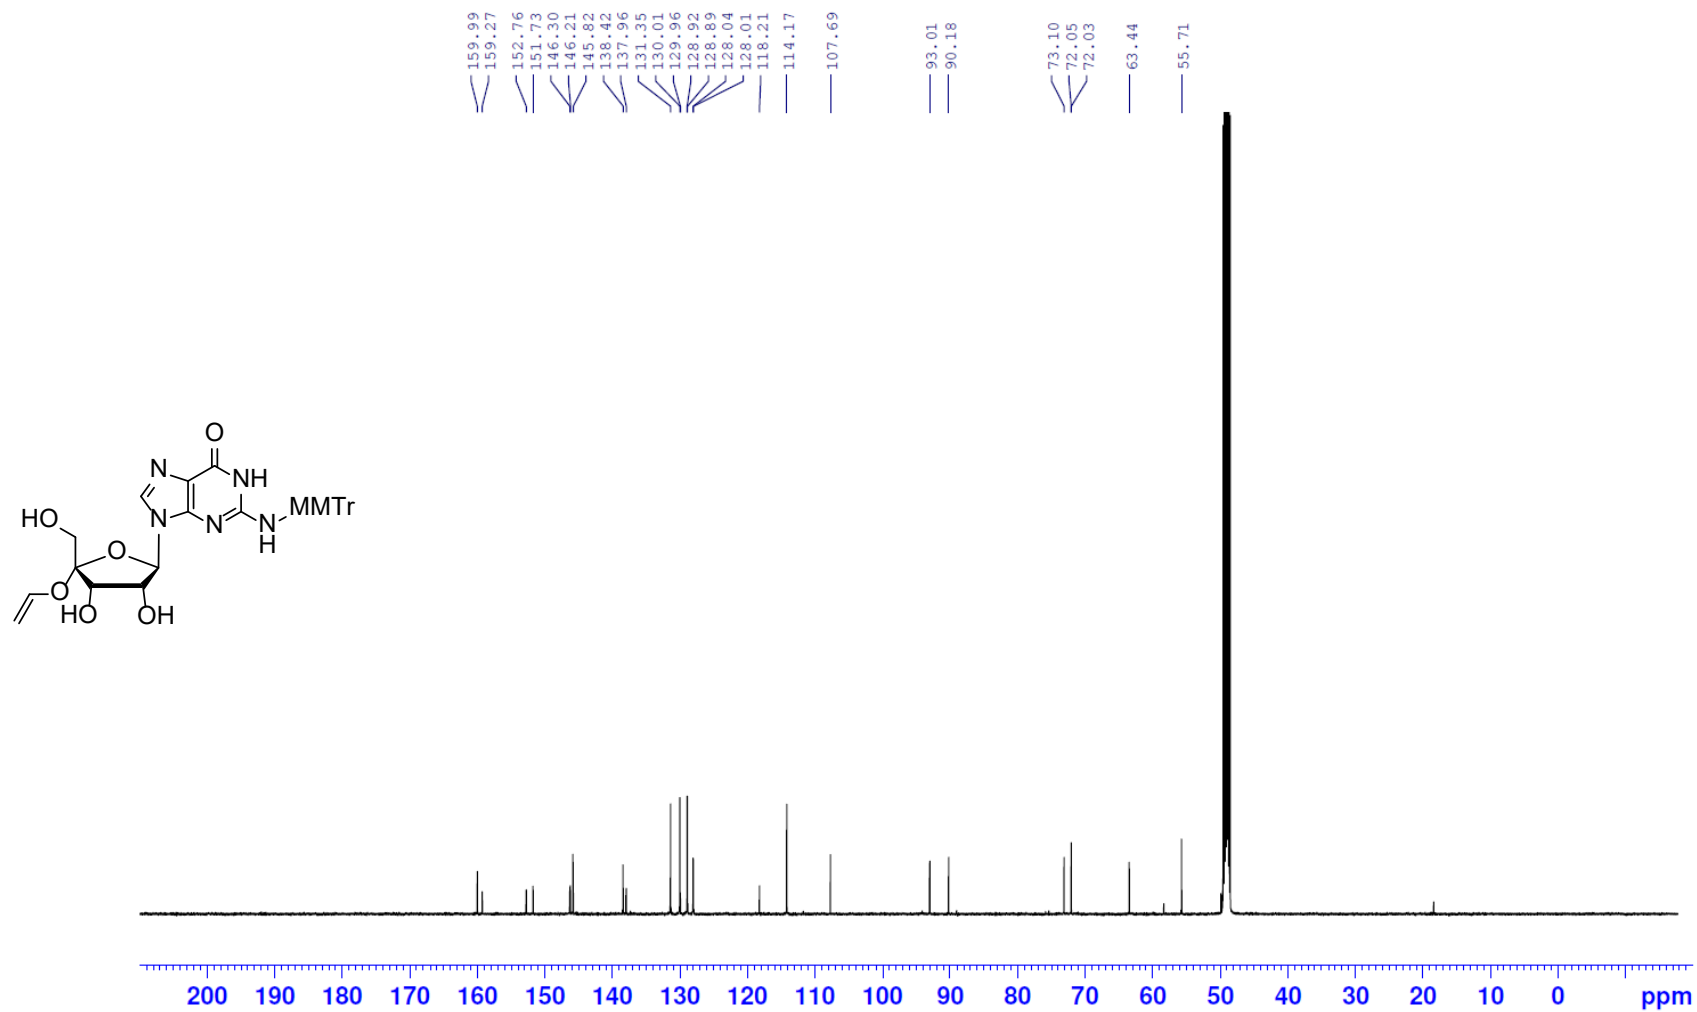

Compound **S2** (500 MHz  $^1\text{H}$  NMR in  $\text{DMSO-}d_6$ )

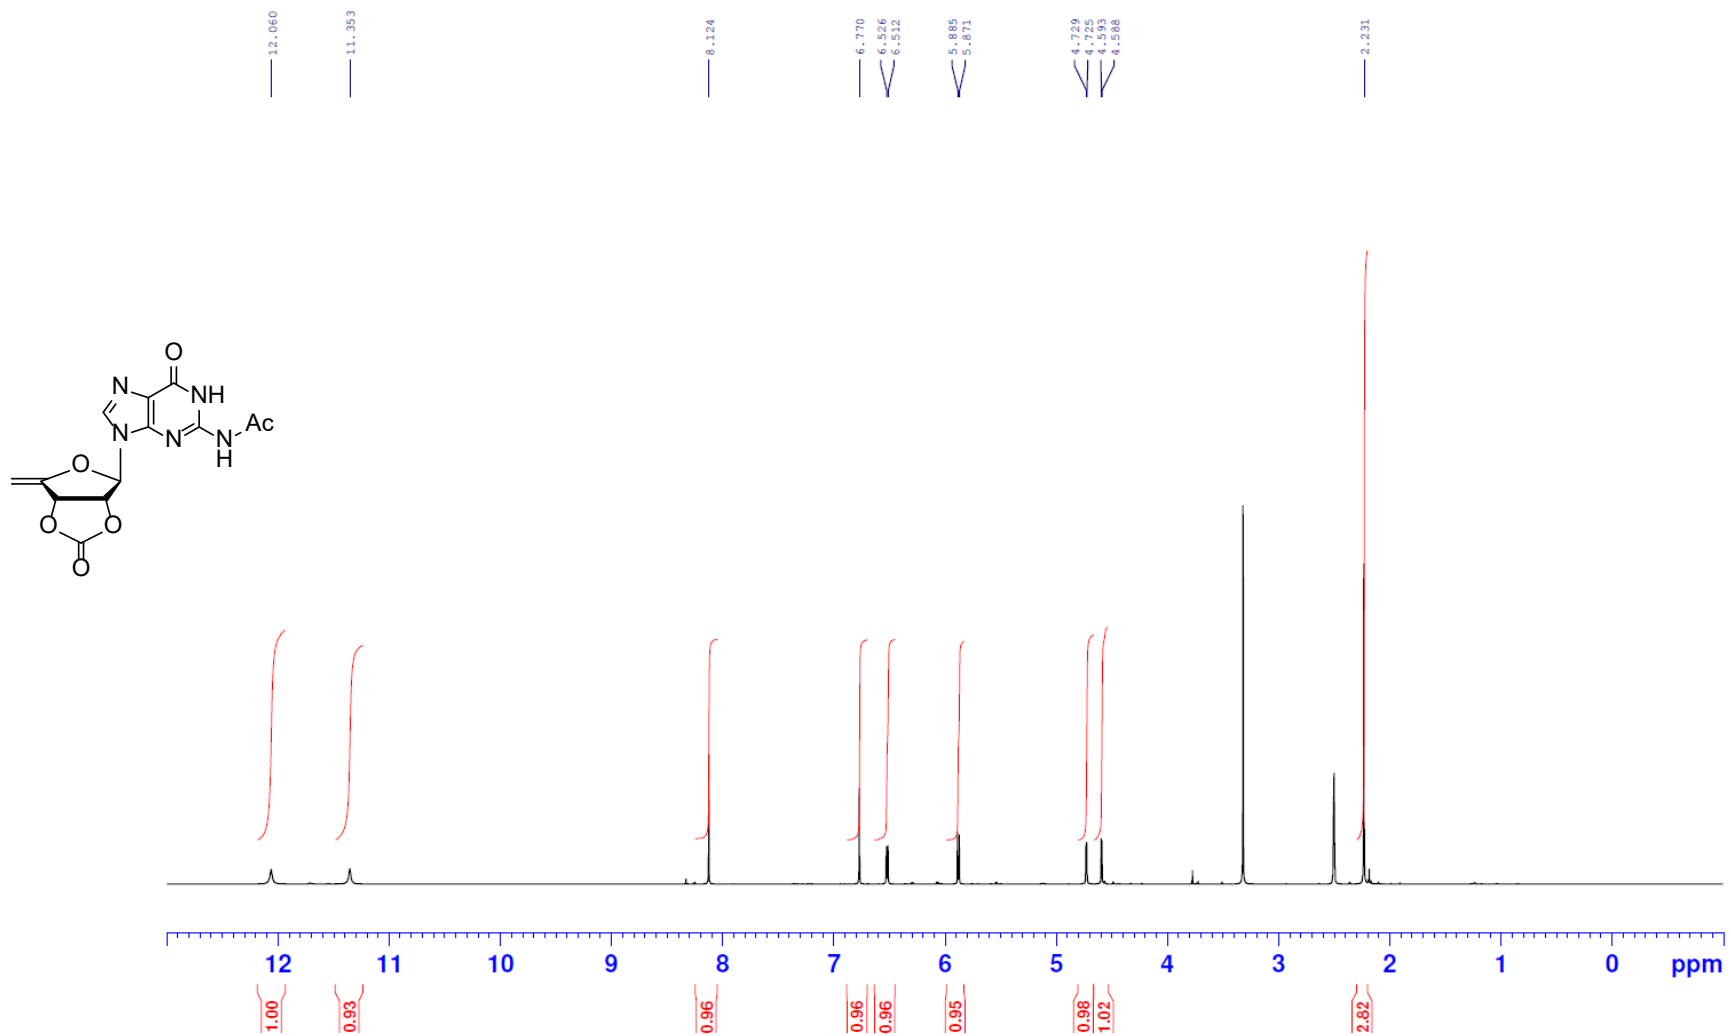

Compound **S2** (125 MHz  $^{13}\text{C}$  NMR in  $\text{DMSO-}d_6$ )

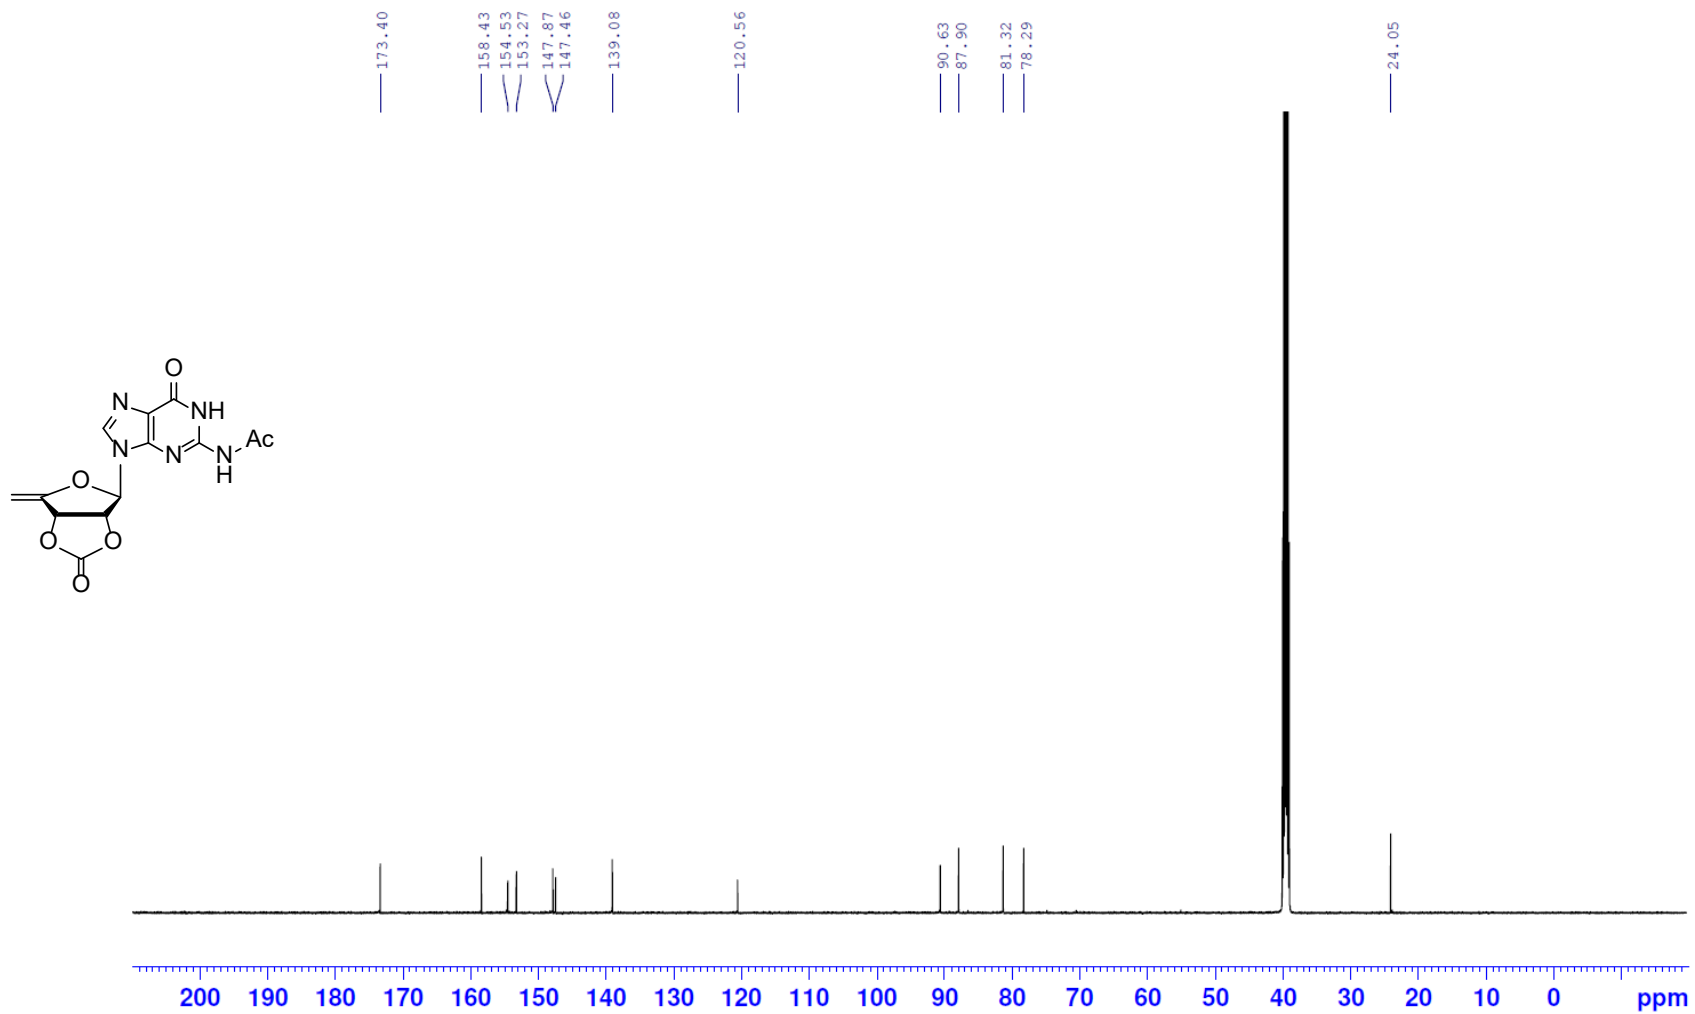



Compound **S3** (500 MHz <sup>1</sup>H NMR in CDCl<sub>3</sub>)

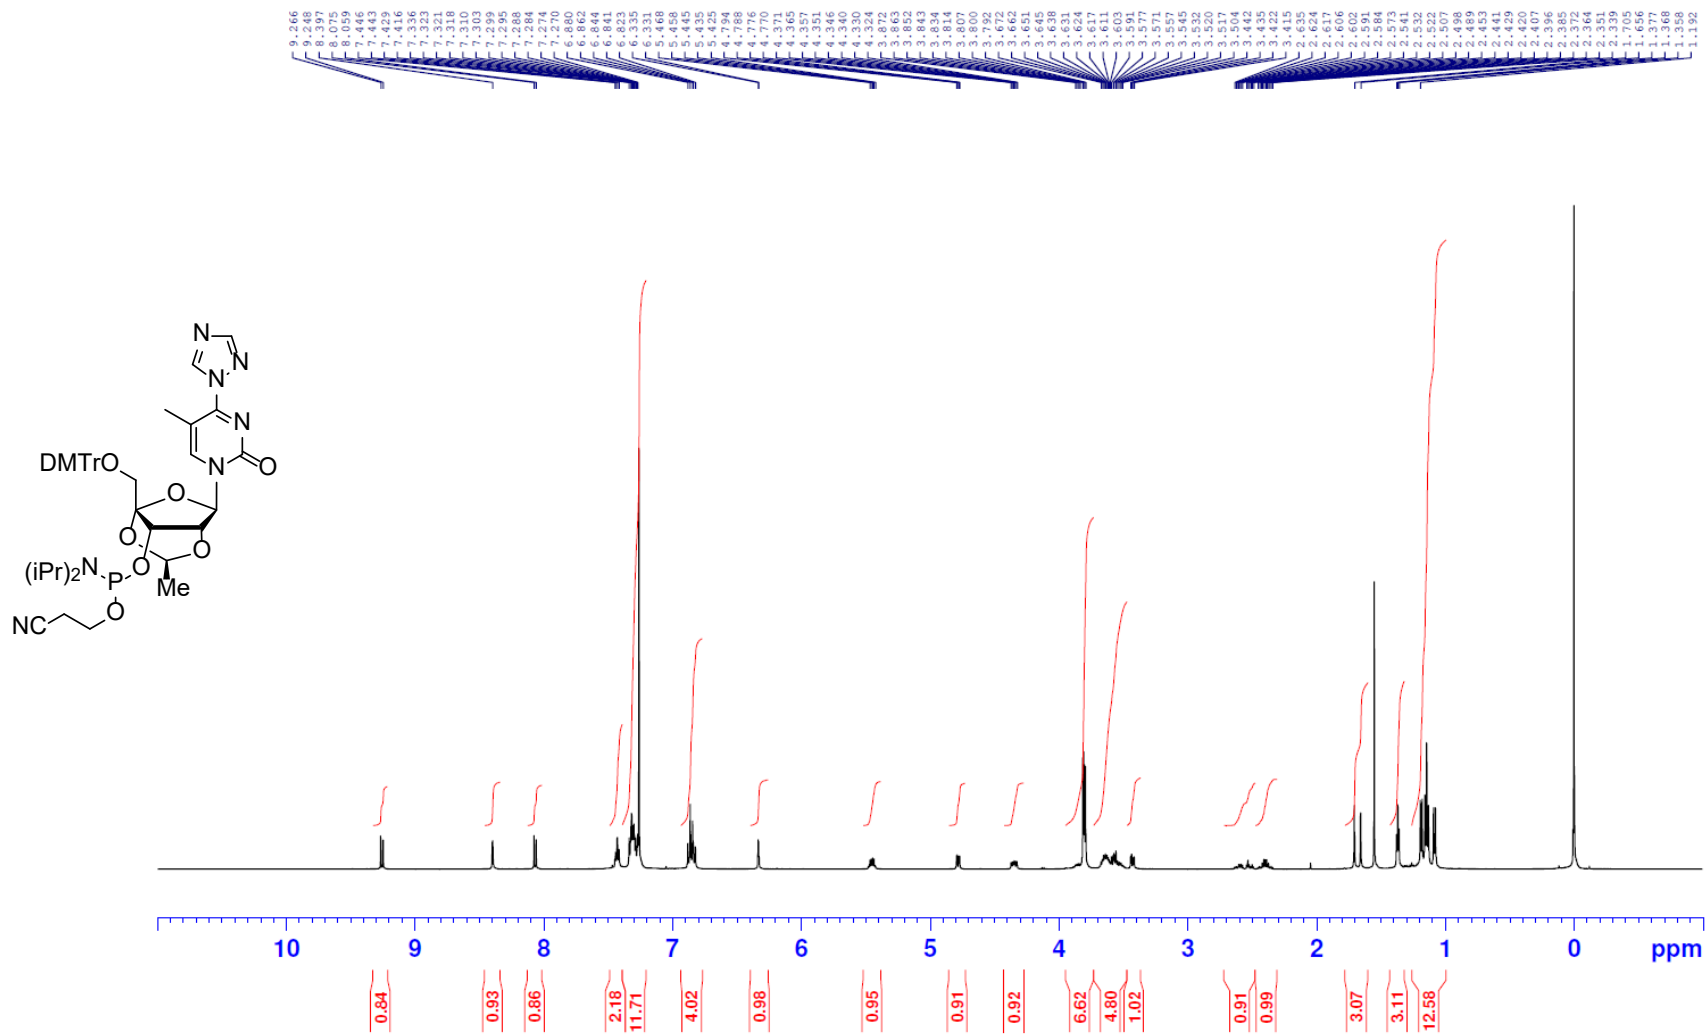

Compound **S3** (202 MHz  $^{31}\text{P}$  NMR in  $\text{CDCl}_3$ )

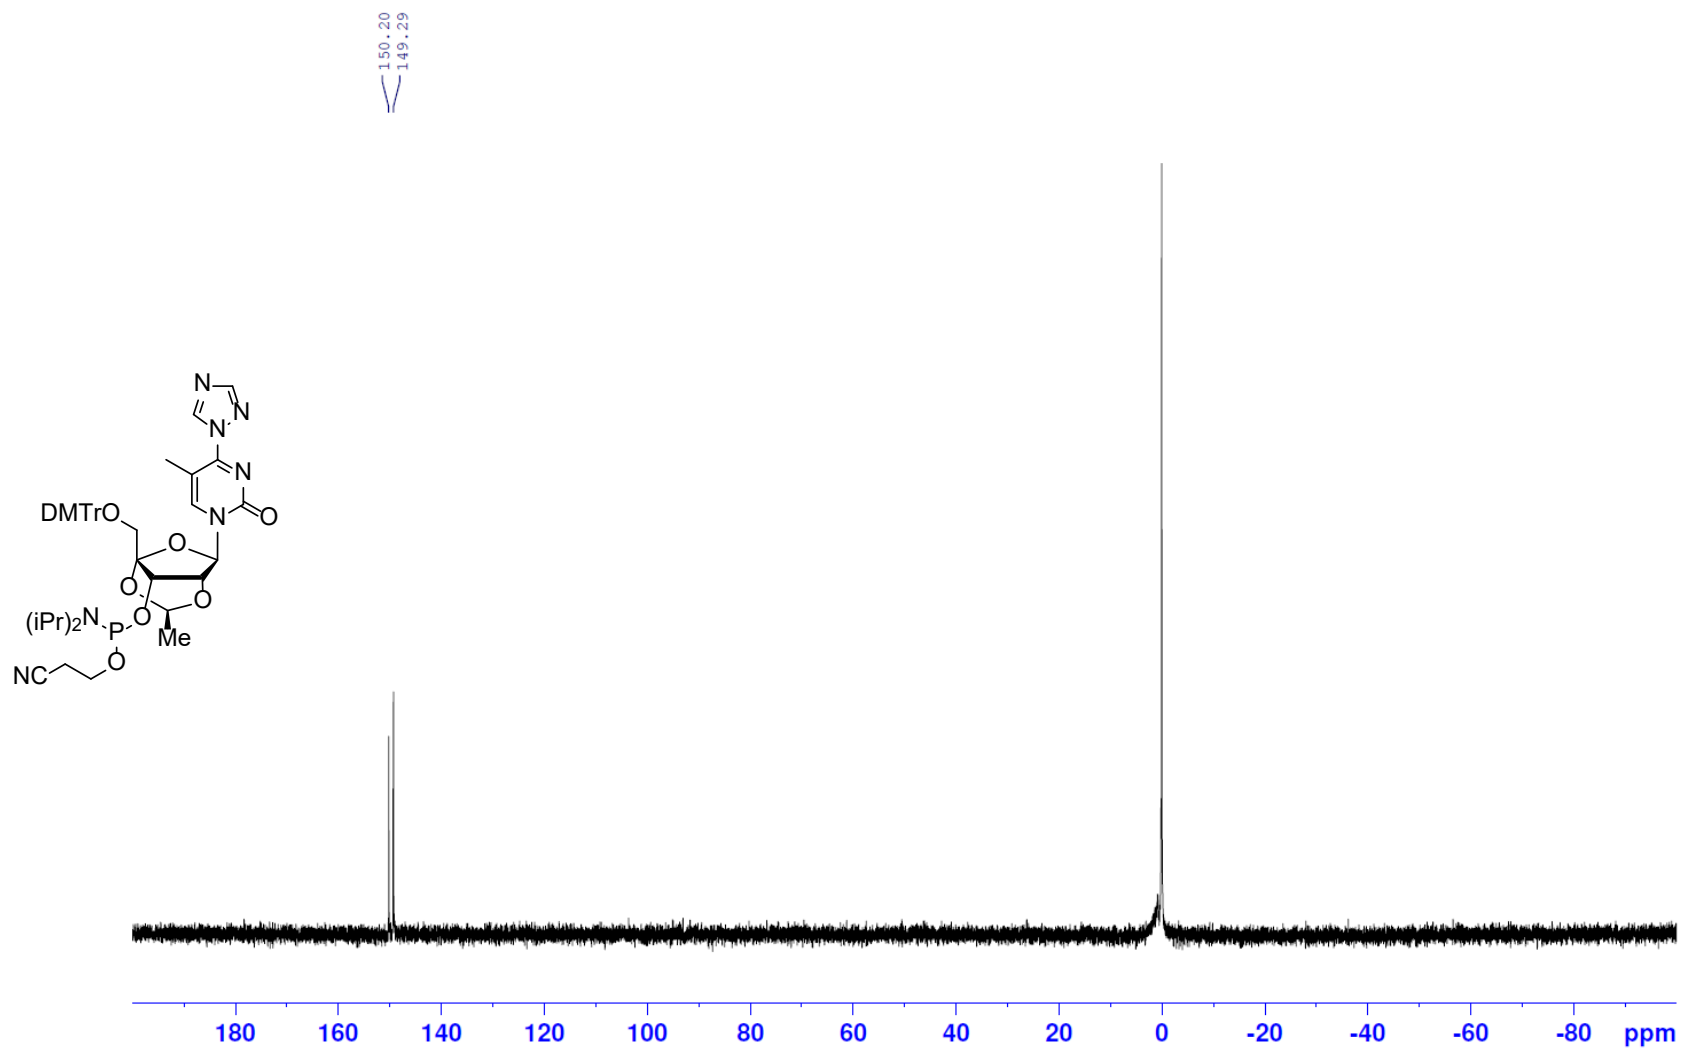

## ON1

Column : Waters XBridge® MS C<sub>18</sub> 5.0 μm, 4.6 × 50 mm.

Gradient : 5-15% MeCN in triethylammonium acetate (0.1 M, pH 7.0) buffer for 30 min.

Flow rate : 1.0 mL/min.

Column temp. : 40 °C.

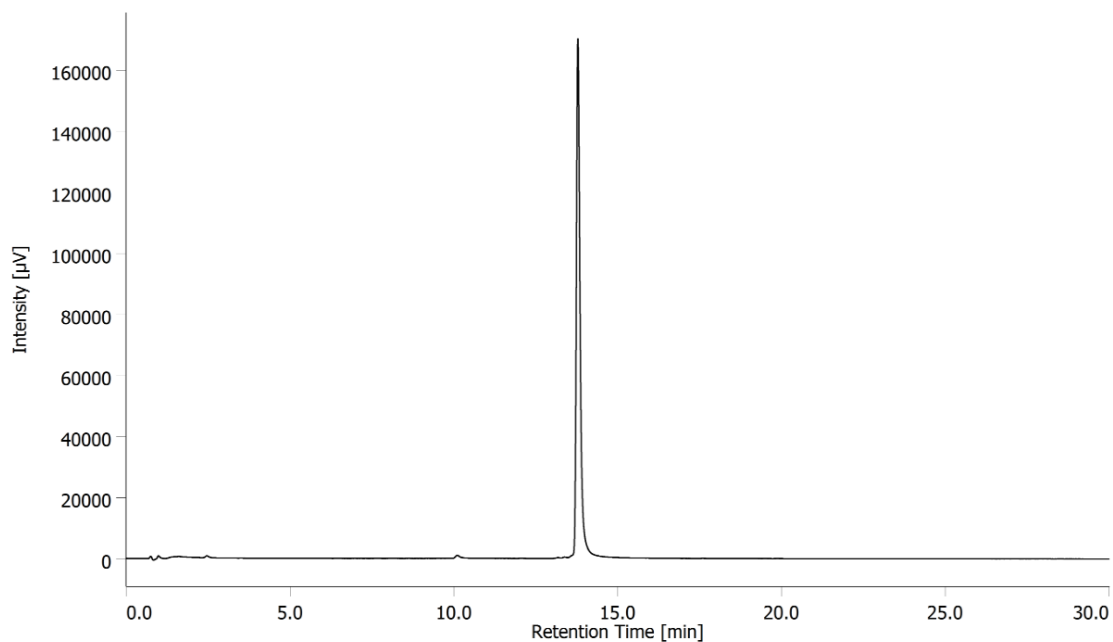

## ESI-MS spectrum of ON1

KW-ON2 (Fuchi)  
Hosha20220707\_05 115 (1.037) M1 [Ev-212029,It12] (Sp,0.500,550:1299,0.10,L33,R33); Cm (105:133)

1: TOF MS ES-  
1.44e5

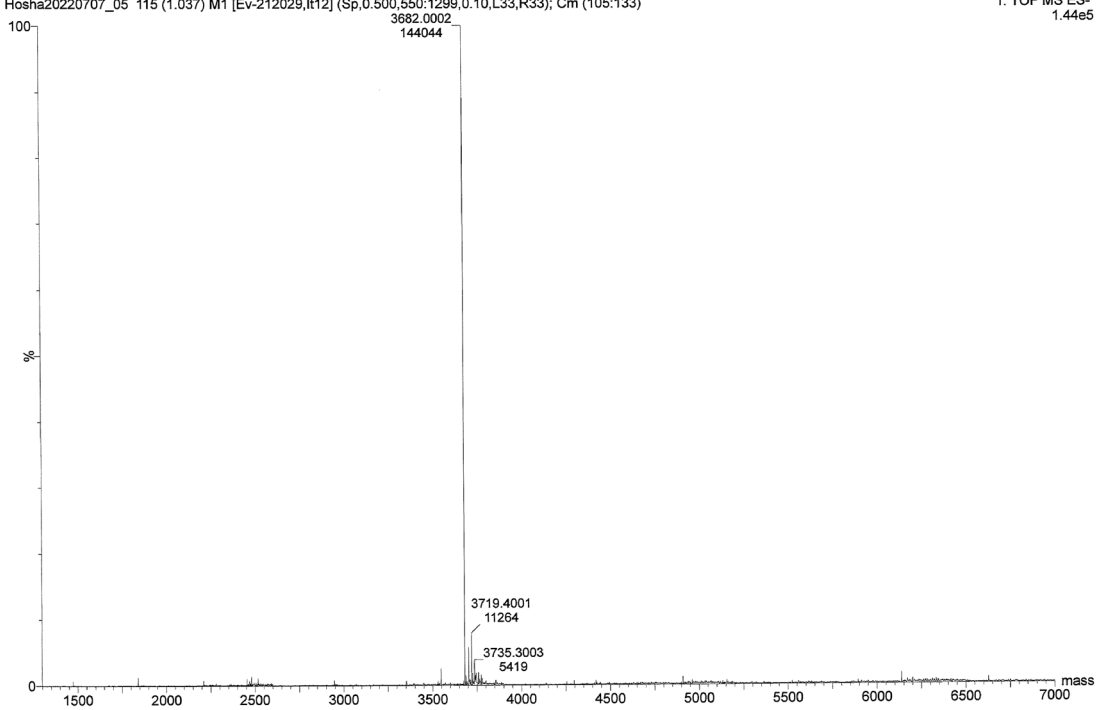

## ON2

Column : Waters XBridge® MS C<sub>18</sub> 5.0 μm, 4.6 × 50 mm.

Gradient : 5-15% MeCN in triethylammonium acetate (0.1 M, pH 7.0) buffer for 30 min.

Flow rate : 1.0 mL/min.

Column temp. : 40 °C.

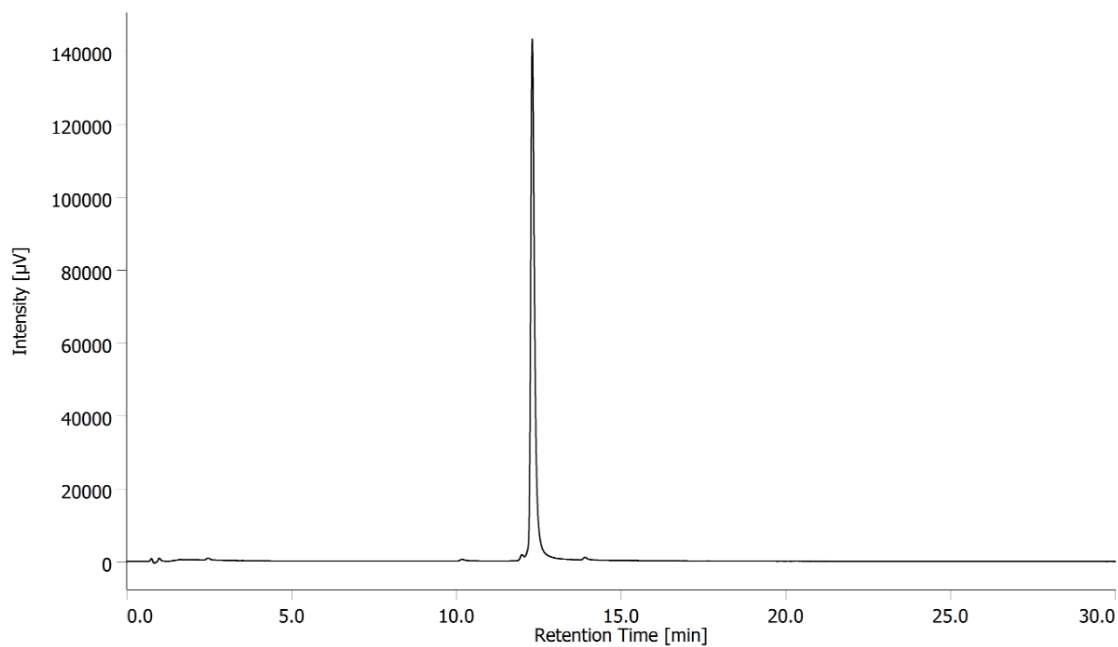

## ESI-MS spectrum of ON2

KW-ON3 (Fuchi)  
Hosha20220707\_06 97 (0.872) M1 [Ev-213558,It13] (Sp,0.500,550:1299.0.10,L33,R33); Cm (73:118)

1: TOF MS ES-  
1.09e5

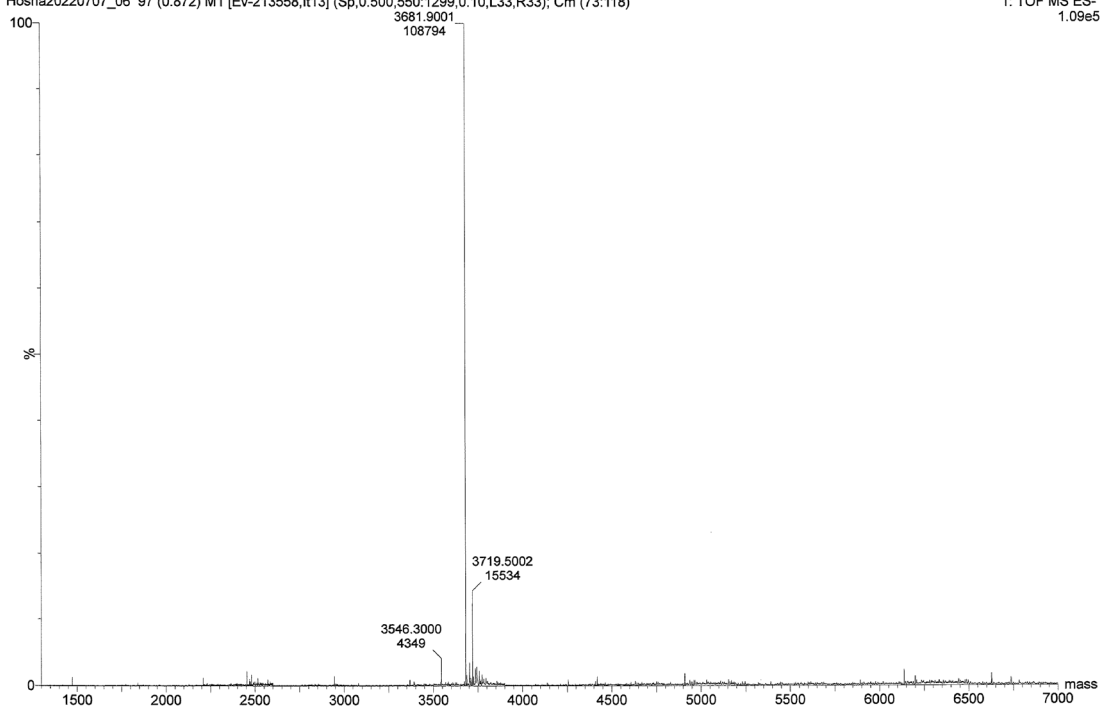

### ON3

Column : Waters XBridge® MS C<sub>18</sub> 5.0 μm, 4.6 × 50 mm.

Gradient : 5-15% MeCN in triethylammonium acetate (0.1 M, pH 7.0) buffer for 30 min.

Flow rate : 1.0 mL/min.

Column temp. : 40 °C.

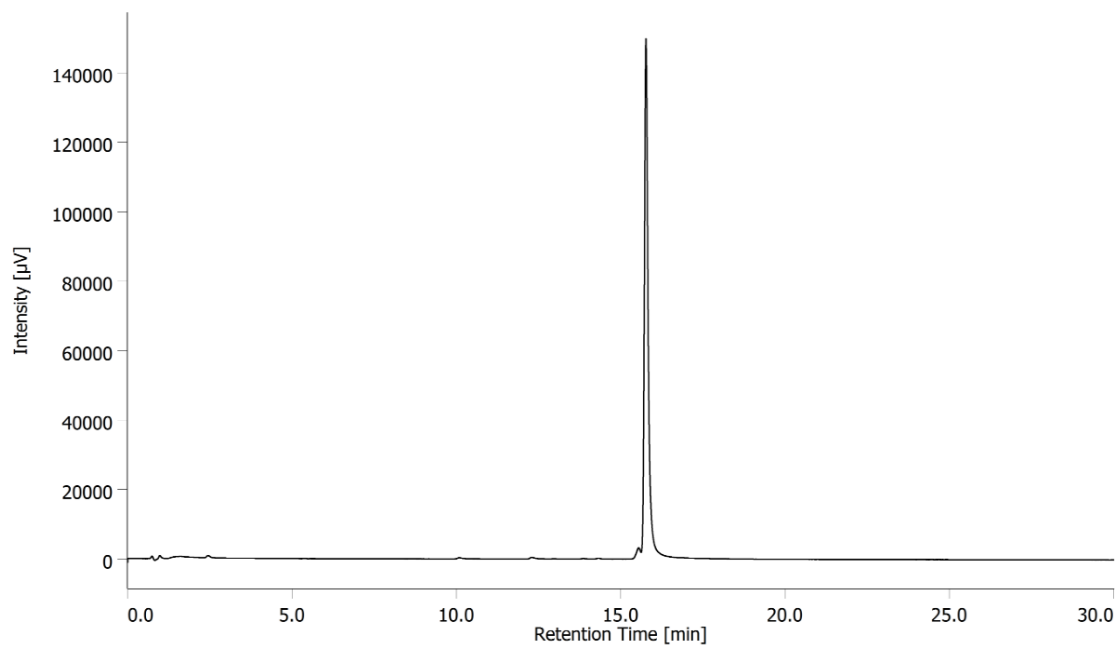

### ESI-MS spectrum of ON3

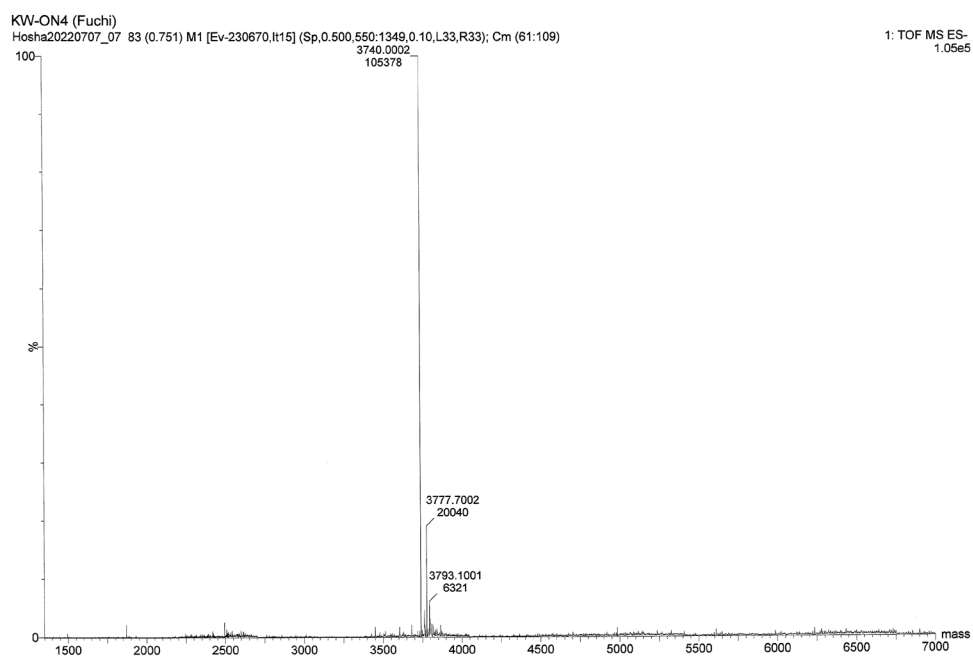

## ON4

Column : Waters XBridge® MS C<sub>18</sub> 5.0 μm, 4.6 × 50 mm.

Gradient : 5-15% MeCN in triethylammonium acetate (0.1 M, pH 7.0) buffer for 30 min.

Flow rate : 1.0 mL/min.

Column temp. : 40 °C.

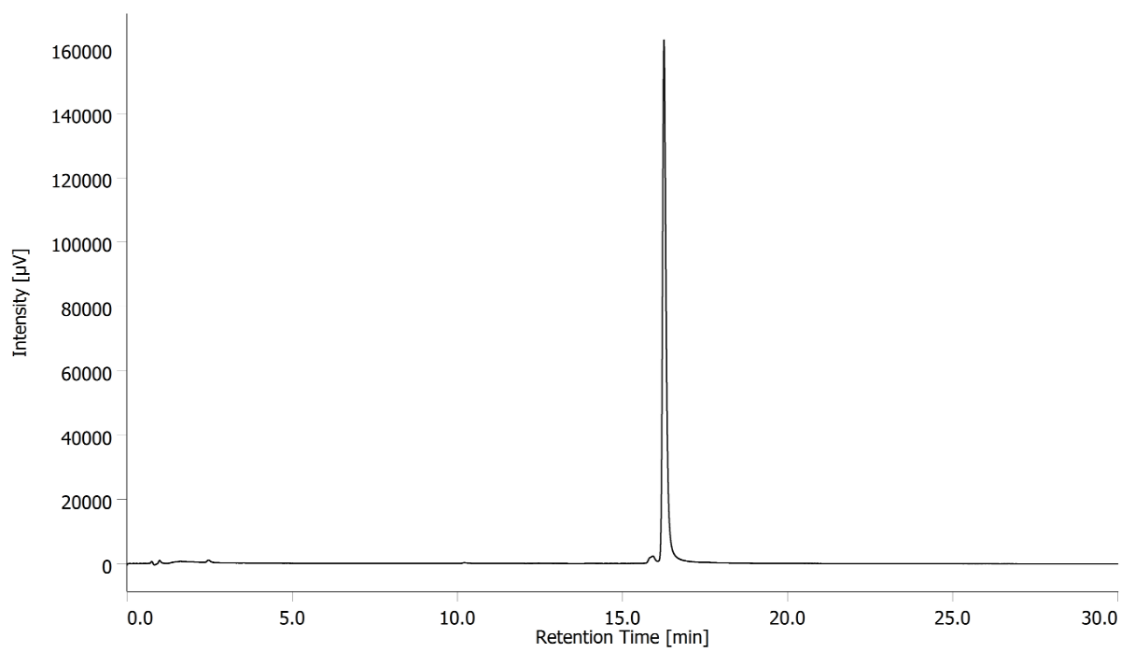

## ESI-MS spectrum of ON4

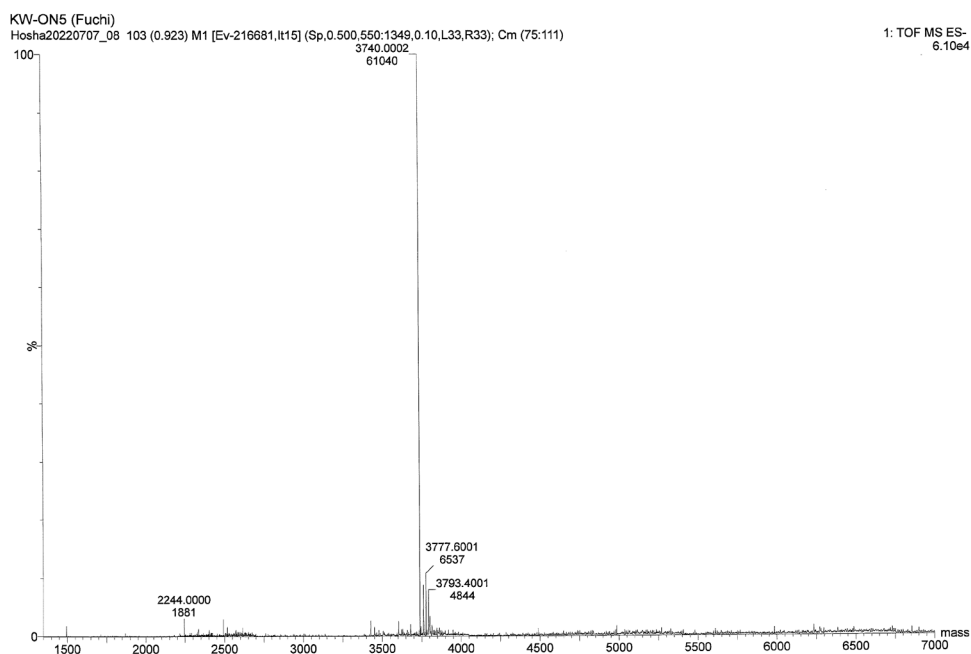

## ON5

Column : Waters XBridge® MS C<sub>18</sub> 5.0 μm, 4.6 × 50 mm.

Gradient : 5-25% MeCN in triethylammonium acetate (0.1 M, pH 7.0) buffer for 30 min.

Flow rate : 1.0 mL/min.

Column temp. : 60 °C.

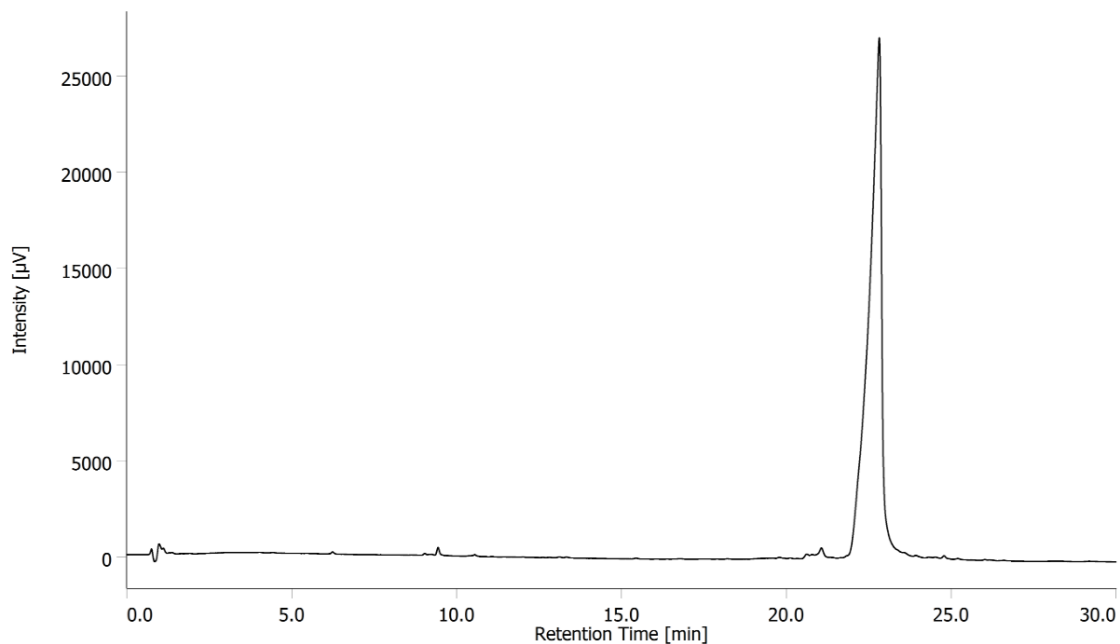

## ESI-MS spectrum of ON5

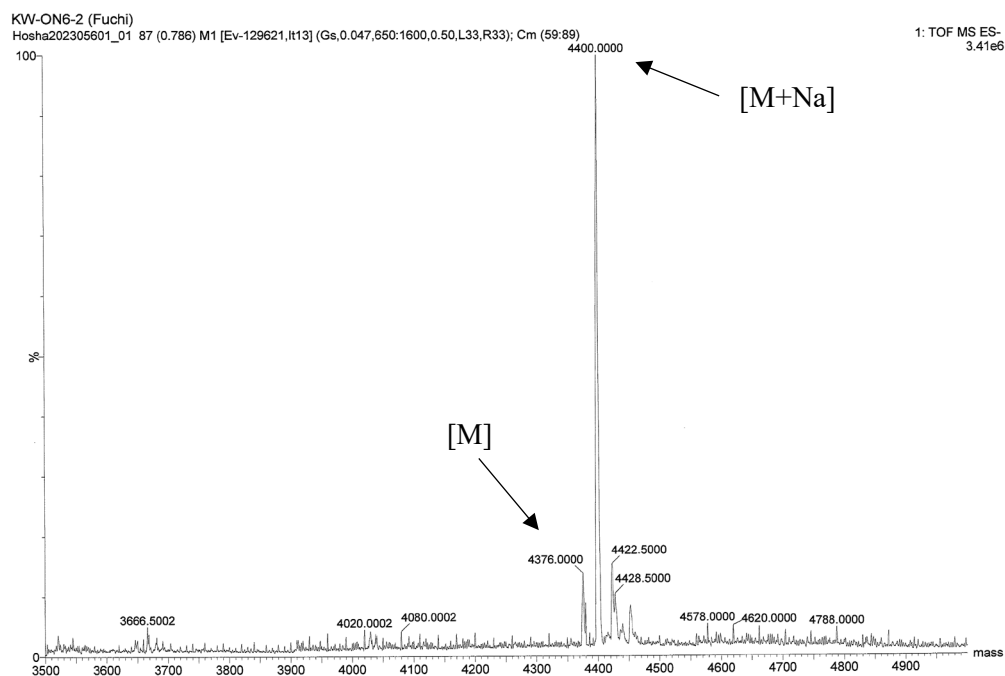

Supplement: d3ob00745f1.pdf [file d3ob00745f1.pdf]
